# Supplementary material for: Niche-Neutral Continuum Seems to Explain the Global Niche Differentiation and Local Drift of the Human Digestive Tract Microbiome
Source: Front Microbiol. 2022 Jul 22;13:912240. doi: 10.3389/fmicb.2022.912240 (PMC9400020; doi:10.3389/fmicb.2022.912240)
Supplement: Supplementary file 2 [file Data_Sheet_2.xlsx]

## Sheet: TableS1
Table S1. The results of fitting the HDP-MSN (hierarchical Dirichlet process approximated, multi-site neutral) model with 1000 times of re-sampling to the DT datasets
ID	LO	θ	M-value	m	Metacommunity					Local community
					LM	NMS	N	PMS	PM=1-PMS	LL	NLS	N	PLS	PL=1-PLS
1	-2413.84	30.4424	21.7879	0.00530491	-2990.26	34	2500	0.0136	0.986	-2592.32	95	2500	0.038	0.962
2	-2637.7	35.4937	17.5726	0.00196724	-3090.54	98	2500	0.0392	0.961	-2823.23	121	2500	0.0484	0.952
3	-2953.5	33.7508	27.7853	0.00383999	-3469.28	107	2500	0.0428	0.957	-3152.17	78	2500	0.0312	0.969
4	-2615.04	34.4116	22.7846	0.00405063	-3238.2	35	2500	0.014	0.986	-2750.44	254	2500	0.1016	0.898
5	-2390.03	30.7061	24.1198	0.00441543	-2869.51	90	2500	0.036	0.964	-2502.92	282	2500	0.1128	0.887
6	-2858.06	34.6821	18.6331	0.000539891	-3339.45	102	2500	0.0408	0.959	-3032.2	158	2500	0.0632	0.937
7	-2706.55	33.8711	24.307	0.00314415	-3215.26	76	2500	0.0304	0.97	-2830.75	282	2500	0.1128	0.887
8	-2966.55	42.0225	20.7569	0.00182627	-3649.01	15	2500	0.006	0.994	-3085.4	414	2500	0.1656	0.834
9	-3385.53	43.5921	19.6236	0.000851128	-4020.58	48	2500	0.0192	0.981	-3587.98	155	2500	0.062	0.938
10	-2863.92	43.6117	17.6891	0.00189767	-3423.71	40	2500	0.016	0.984	-3085.27	67	2500	0.0268	0.973
11	-2821.42	29.1961	30.6991	0.00181999	-3451.06	61	2500	0.0244	0.976	-2972.68	219	2500	0.0876	0.912
12	-2699.13	31.1263	26.7914	0.00343539	-3174.29	127	2500	0.0508	0.949	-2860.54	113	2500	0.0452	0.955
13	-2643.92	37.9739	16.6894	0.00217415	-3155.07	48	2500	0.0192	0.981	-2866.64	62	2500	0.0248	0.975
14	-2687.64	30.1544	27.9547	0.00228044	-3202.08	80	2500	0.032	0.968	-2802.86	313	2500	0.1252	0.875
15	-2690.81	36.373	21.341	0.00219731	-3222.01	48	2500	0.0192	0.981	-2852.5	166	2500	0.0664	0.934
16	-2593.04	29.9978	32.1264	0.00323678	-3276.31	22	2500	0.0088	0.991	-2692.74	413	2500	0.1652	0.835
17	-2964.26	48.1878	15.5788	0.000712128	-3636.1	8	2500	0.0032	0.997	-3203.81	61	2500	0.0244	0.976
18	-2897.69	39.2345	19.4214	0.0015298	-3426.39	71	2500	0.0284	0.972	-3042.44	219	2500	0.0876	0.912
19	-2807.31	30.5605	31.9275	0.0027328	-3545.18	25	2500	0.01	0.99	-2941.68	259	2500	0.1036	0.896
20	-2694.81	34.521	17.4554	0.00179525	-3216.31	62	2500	0.0248	0.975	-2916.71	49	2500	0.0196	0.98
21	-2629.79	35.3441	22.1227	0.00367758	-3213.75	45	2500	0.018	0.982	-2798.4	142	2500	0.0568	0.943
22	-2962.87	41.0921	23.9144	0.00357719	-3682.68	19	2500	0.0076	0.992	-3143.54	124	2500	0.0496	0.95
23	-1993.82	26.2718	26.5376	0.00505386	-2449.41	55	2500	0.022	0.978	-2088.15	349	2500	0.1396	0.86
24	-2747.57	31.2485	32.0495	0.00418172	-3403.18	37	2500	0.0148	0.985	-2886.14	225	2500	0.09	0.91
25	-2889.1	36.9813	21.7424	0.00280472	-3473.98	51	2500	0.0204	0.98	-3067.43	171	2500	0.0684	0.932
26	-3090.04	36.8929	21.5014	0.00130678	-3595.53	96	2500	0.0384	0.962	-3250.69	204	2500	0.0816	0.918
27	-2472.9	38.5632	13.2399	0.00127023	-2889.21	74	2500	0.0296	0.97	-2655.56	98	2500	0.0392	0.961
28	-2809.97	41.1609	16.6644	0.00234385	-3364.92	38	2500	0.0152	0.985	-2993.28	150	2500	0.06	0.94
29	-2506.82	30.5422	22.601	0.00429009	-2857.69	222	2500	0.0888	0.911	-2677.99	91	2500	0.0364	0.964
30	-2702.17	31.275	26.0109	0.00242239	-3210.26	81	2500	0.0324	0.968	-2797.83	448	2500	0.1792	0.821
31	-2457.7	32.6386	20.5661	0.00227985	-2921.11	76	2500	0.0304	0.97	-2611.26	165	2500	0.066	0.934
32	-2510.71	27.95	20.977	0.00385793	-2800.94	341	2500	0.1364	0.864	-2659.48	127	2500	0.0508	0.949
33	-3166.19	50.0594	18.8373	0.000903442	-3820.34	14	2500	0.0056	0.994	-3416.39	64	2500	0.0256	0.974
34	-2282.72	29.2693	19.9197	0.00263939	-2843.24	44	2500	0.0176	0.982	-2442.41	129	2500	0.0516	0.948
35	-2666.4	34.8756	21.051	0.00223917	-3257.16	34	2500	0.0136	0.986	-2861.17	84	2500	0.0336	0.966
36	-2582.05	36.9178	19.2561	0.00192038	-3048.9	71	2500	0.0284	0.972	-2728.18	192	2500	0.0768	0.923
37	-2451.24	36.3009	17.7762	0.00331387	-2941.2	53	2500	0.0212	0.979	-2637.68	99	2500	0.0396	0.96
38	-2786.9	40.1565	16.5993	0.0014932	-3308.61	54	2500	0.0216	0.978	-3008.89	94	2500	0.0376	0.962
39	-2811.49	38.1593	17.2254	0.00121063	-3292.22	83	2500	0.0332	0.967	-2979.88	180	2500	0.072	0.928
40	-3131.69	36.969	26.6483	0.00293581	-3945.59	13	2500	0.0052	0.995	-3340	108	2500	0.0432	0.957
41	-3229.52	37.5113	27.827	0.00146885	-3866.16	56	2500	0.0224	0.978	-3414.69	156	2500	0.0624	0.938
42	-2322.7	25.8997	24.8584	0.00403882	-2684.7	229	2500	0.0916	0.908	-2420.83	344	2500	0.1376	0.862
43	-2882.43	42.4589	19.0905	0.00170815	-3555.29	14	2500	0.0056	0.994	-3087.36	93	2500	0.0372	0.963
44	-2673.14	31.0512	25.3042	0.00266758	-3219.19	62	2500	0.0248	0.975	-2863.62	75	2500	0.03	0.97
45	-2965.41	36.9109	26.9969	0.00206689	-3714.82	24	2500	0.0096	0.99	-3195.2	54	2500	0.0216	0.978
46	-2931.45	38.0764	21.55	0.00228605	-3483.47	51	2500	0.0204	0.98	-3092.8	184	2500	0.0736	0.926
47	-2403.96	30.9814	24.9374	0.00254581	-2844.31	98	2500	0.0392	0.961	-2516.65	321	2500	0.1284	0.872
48	-3253.58	41.7728	23.6166	0.00109965	-4030.98	15	2500	0.006	0.994	-3440.21	157	2500	0.0628	0.937
49	-2979.91	51.0645	18.0632	0.00181826	-3670.39	8	2500	0.0032	0.997	-3098.62	464	2500	0.1856	0.814
50	-2861.61	40.6742	25.154	0.00216997	-3566.68	11	2500	0.0044	0.996	-3058.86	117	2500	0.0468	0.953
51	-2885.16	46.4994	16.4241	0.00166884	-3454.81	36	2500	0.0144	0.986	-3047.95	216	2500	0.0864	0.914
52	-2225.24	33.6784	18.3949	0.00391182	-2613.49	111	2500	0.0444	0.956	-2351.29	228	2500	0.0912	0.909
53	-2814.04	36.1277	35.1311	0.00393857	-3532.8	10	2500	0.004	0.996	-2948.29	259	2500	0.1036	0.896
54	-2466.9	28.0854	24.9699	0.00410725	-2810.25	267	2500	0.1068	0.893	-2571.98	379	2500	0.1516	0.848
55	-2716.63	36.3724	30.175	0.0040169	-3530.31	8	2500	0.0032	0.997	-2888.98	160	2500	0.064	0.936
56	-2974.84	38.9346	22.7678	0.00195247	-3636.92	20	2500	0.008	0.992	-3232.35	31	2500	0.0124	0.988
57	-2569.05	28.1543	26.5488	0.00324113	-3081.13	108	2500	0.0432	0.957	-2719.89	172	2500	0.0688	0.931
58	-2677.55	39.9915	15.4489	0.00245125	-3051.41	157	2500	0.0628	0.937	-2854.87	139	2500	0.0556	0.944
59	-2312.18	34.0387	17.7113	0.00480343	-2717.64	84	2500	0.0336	0.966	-2418.06	371	2500	0.1484	0.852
60	-2793.02	30.1048	31.4808	0.00390661	-3358.64	71	2500	0.0284	0.972	-2946.63	154	2500	0.0616	0.938
61	-2718.67	35.5445	34.9	0.00433546	-3537.44	3	2500	0.0012	0.999	-2863.53	225	2500	0.09	0.91
62	-2767.85	36.8219	23.8654	0.00255947	-3411.42	20	2500	0.008	0.992	-2993.82	36	2500	0.0144	0.986
63	-2874.3	43.011	23.1385	0.00194726	-3699.48	5	2500	0.002	0.998	-3045.34	187	2500	0.0748	0.925
64	-2977.7	41.9938	20.4734	0.00179685	-3625.19	18	2500	0.0072	0.993	-3173.59	113	2500	0.0452	0.955
65	-2656.09	37.6853	28.0131	0.00307208	-3369.03	15	2500	0.006	0.994	-2841.06	99	2500	0.0396	0.96
66	-2834.06	37.554	22.0362	0.0028572	-3386.53	54	2500	0.0216	0.978	-3026.68	111	2500	0.0444	0.956
67	-3549.42	41.4288	24.7	0.0012927	-4315.82	31	2500	0.0124	0.988	-3807.77	68	2500	0.0272	0.973
68	-2749.57	36.9875	21.6703	0.00272928	-3270.97	52	2500	0.0208	0.979	-2923.62	143	2500	0.0572	0.943
69	-3292.71	46.0528	28.1196	0.00208612	-4219.85	5	2500	0.002	0.998	-3502.63	92	2500	0.0368	0.963
70	-2885.86	42.8635	28.5735	0.00319557	-3726.02	2	2500	0.0008	0.999	-3066.91	119	2500	0.0476	0.952
71	-3210.95	43.1917	24.6913	0.00212807	-4033.37	11	2500	0.0044	0.996	-3442.82	81	2500	0.0324	0.968
72	-3225.14	34.7534	35.4008	0.00206488	-4056.47	17	2500	0.0068	0.993	-3384.47	214	2500	0.0856	0.914
73	-2885.2	37.1233	22.2729	0.00343597	-3449.03	51	2500	0.0204	0.98	-3063.36	134	2500	0.0536	0.946
74	-2614.5	28.4838	25.6382	0.00199191	-3179.91	65	2500	0.026	0.974	-2776.11	134	2500	0.0536	0.946
75	-2642.13	37.909	14.6616	0.00147948	-2932.8	282	2500	0.1128	0.887	-2751.78	397	2500	0.1588	0.841
76	-2772.48	47.1875	15.1643	0.00139928	-3213.45	83	2500	0.0332	0.967	-2904.82	278	2500	0.1112	0.889
77	-2513.21	36.6085	20.2374	0.00387539	-3051.91	37	2500	0.0148	0.985	-2652.21	238	2500	0.0952	0.905
78	-2405.87	34.9378	17.7863	0.00164385	-3019.47	28	2500	0.0112	0.989	-2600.11	87	2500	0.0348	0.965
79	-2328.53	34.3466	21.1344	0.00832479	-2826.23	46	2500	0.0184	0.982	-2482.03	123	2500	0.0492	0.951
80	-2601.73	30.478	28.3745	0.00306381	-3280.87	26	2500	0.0104	0.99	-2796.19	83	2500	0.0332	0.967
81	-3105.76	36.0984	23.0887	0.00216841	-3736.72	59	2500	0.0236	0.976	-3298.84	120	2500	0.048	0.952
82	-2424.75	25.2917	23.4359	0.00315125	-2776.28	240	2500	0.096	0.904	-2554.86	197	2500	0.0788	0.921
83	-2407.66	29.2731	27.9471	0.00447101	-2938.56	56	2500	0.0224	0.978	-2528.41	219	2500	0.0876	0.912
84	-3268.51	41.4037	25.413	0.00154153	-4071.03	13	2500	0.0052	0.995	-3454.96	168	2500	0.0672	0.933
85	-3156.88	34.8592	23.3469	0.00118644	-3669.65	117	2500	0.0468	0.953	-3312.54	217	2500	0.0868	0.913
86	-2897.77	37.9702	24.9192	0.00168207	-3563.42	27	2500	0.0108	0.989	-3009.67	379	2500	0.1516	0.848
87	-2524.44	32.139	25.5807	0.00278392	-3081.3	43	2500	0.0172	0.983	-2695.82	130	2500	0.052	0.948
88	-3117.67	44.2325	19.8195	0.00308692	-3688.33	50	2500	0.02	0.98	-3309.1	131	2500	0.0524	0.948
89	-2316.69	32.3865	19.0597	0.00272441	-2725.1	106	2500	0.0424	0.958	-2455.9	181	2500	0.0724	0.928
90	-3076.96	36.9959	32.0878	0.00201289	-3923.77	7	2500	0.0028	0.997	-3236.69	191	2500	0.0764	0.924
91	-2709.21	35.8497	15.6675	0.00166314	-3128.92	112	2500	0.0448	0.955	-2884.77	152	2500	0.0608	0.939
92	-2702	29.4847	22.6912	0.00422894	-3044.21	311	2500	0.1244	0.876	-2845.92	189	2500	0.0756	0.924
93	-2667.46	30.8732	33.2175	0.00454548	-3253.68	46	2500	0.0184	0.982	-2799.02	252	2500	0.1008	0.899
94	-2538.56	32.4138	19.6478	0.00223635	-3090.23	49	2500	0.0196	0.98	-2667.13	265	2500	0.106	0.894
95	-2590.16	28.6218	31.227	0.00317566	-3198.95	49	2500	0.0196	0.98	-2771.31	73	2500	0.0292	0.971
96	-2522.35	30.2921	31.8806	0.00559345	-3001.68	85	2500	0.034	0.966	-2611.77	427	2500	0.1708	0.829
97	-2864.01	37.3561	25.0739	0.00186397	-3576.87	12	2500	0.0048	0.995	-3045.96	106	2500	0.0424	0.958
98	-2864.77	36.6309	20.9127	0.00175157	-3542.24	25	2500	0.01	0.99	-3131.68	25	2500	0.01	0.99
99	-3280.36	45.7617	18.8557	0.000869228	-3866.65	56	2500	0.0224	0.978	-3468.27	155	2500	0.062	0.938
100	-2725.74	39.8499	20.2627	0.00189995	-3347.32	22	2500	0.0088	0.991	-2915.88	102	2500	0.0408	0.959
101	-2943.04	40.0659	24.7499	0.00195507	-3598.3	24	2500	0.0096	0.99	-3095.67	236	2500	0.0944	0.906
102	-2682.83	35.2429	28.2733	0.00286366	-3340.07	29	2500	0.0116	0.988	-2798.08	342	2500	0.1368	0.863
103	-2926.51	36.1028	24.5109	0.000870793	-3559.96	43	2500	0.0172	0.983	-3084.72	206	2500	0.0824	0.918
104	-2662.3	31.6478	22.8208	0.00154759	-3064.32	184	2500	0.0736	0.926	-2805.9	169	2500	0.0676	0.932
105	-2883.57	37.6876	16.3029	0.000754642	-3363.73	95	2500	0.038	0.962	-3082.39	116	2500	0.0464	0.954
106	-3064.97	38.0221	19.671	0.0012974	-3569.62	91	2500	0.0364	0.964	-3286.12	71	2500	0.0284	0.972
107	-2648.09	30.0236	25.3076	0.00411932	-3042.74	177	2500	0.0708	0.929	-2790.33	214	2500	0.0856	0.914
108	-2353.48	27.965	25.8004	0.00419668	-2839.19	78	2500	0.0312	0.969	-2482.94	210	2500	0.084	0.916
109	-2655.55	40.482	23.6499	0.00361373	-3292.5	9	2500	0.0036	0.996	-2801.6	220	2500	0.088	0.912
110	-2844.41	35.6124	20.0831	0.00186711	-3363.33	79	2500	0.0316	0.968	-3066.89	52	2500	0.0208	0.979
111	-2562.39	38.732	18.3861	0.00143767	-3182.56	18	2500	0.0072	0.993	-2741.82	131	2500	0.0524	0.948
112	-2077.32	26.2087	17.122	0.00205499	-2445.84	129	2500	0.0516	0.948	-2211.68	149	2500	0.0596	0.94
113	-2963.81	44.4524	17.8659	0.000919591	-3722.95	8	2500	0.0032	0.997	-3197.64	61	2500	0.0244	0.976
114	-2525.14	35.1498	18.8626	0.00309789	-3064.16	40	2500	0.016	0.984	-2664.7	230	2500	0.092	0.908
115	-2815.79	37.2126	20.6656	0.00232368	-3300.32	72	2500	0.0288	0.971	-3000.38	98	2500	0.0392	0.961
116	-2390.17	29.4443	26.5684	0.00339255	-2926.95	45	2500	0.018	0.982	-2528.08	188	2500	0.0752	0.925
117	-2546.72	33.6213	16.3801	0.00218623	-2971.94	117	2500	0.0468	0.953	-2727.61	107	2500	0.0428	0.957
118	-2869.15	40.7542	20.8039	0.00189375	-3401.33	57	2500	0.0228	0.977	-3008.28	294	2500	0.1176	0.882
119	-2812.42	35.1578	21.0462	0.00170294	-3375.32	60	2500	0.024	0.976	-3034.12	52	2500	0.0208	0.979
120	-3091.71	37.6652	23.3684	0.00103783	-3789.9	19	2500	0.0076	0.992	-3301.52	100	2500	0.04	0.96
121	-3005.53	46.1277	21.2466	0.00355875	-3661.22	20	2500	0.008	0.992	-3210.84	111	2500	0.0444	0.956
122	-3495.44	46.1063	23.3073	0.00121821	-4405.16	5	2500	0.002	0.998	-3765.01	52	2500	0.0208	0.979
123	-2463.25	31.27	19.1722	0.00279221	-2855.22	149	2500	0.0596	0.94	-2566.63	396	2500	0.1584	0.842
124	-2579.67	36.7449	17.6296	0.00214433	-3094.1	45	2500	0.018	0.982	-2798.24	61	2500	0.0244	0.976
125	-3111.46	46.4211	18.8115	0.000965208	-3729.25	28	2500	0.0112	0.989	-3290.88	171	2500	0.0684	0.932
126	-2377.75	28.7117	25.1893	0.00620972	-2762	166	2500	0.0664	0.934	-2501.72	212	2500	0.0848	0.915
127	-2796.54	44.4291	18.4208	0.00170894	-3429.25	19	2500	0.0076	0.992	-2993.03	125	2500	0.05	0.95
128	-2219.6	25.509	22.7422	0.00555763	-2631.34	151	2500	0.0604	0.94	-2350.76	193	2500	0.0772	0.923
129	-2290.21	27.943	21.9137	0.00522013	-2603.57	254	2500	0.1016	0.898	-2416.44	209	2500	0.0836	0.916
130	-2816.76	39.9287	25.3645	0.00353812	-3428.17	32	2500	0.0128	0.987	-2961.26	210	2500	0.084	0.916
131	-3032.21	31.8602	26.5335	0.00212056	-3591.97	112	2500	0.0448	0.955	-3201.95	146	2500	0.0584	0.942
132	-2872.61	44.5514	21.9106	0.00629178	-3483.31	32	2500	0.0128	0.987	-2981.46	436	2500	0.1744	0.826
133	-2710.5	35.1541	23.6588	0.00273929	-3311.4	35	2500	0.014	0.986	-2922.35	50	2500	0.02	0.98
134	-2693.42	33.1197	19.7953	0.00231597	-3127.08	146	2500	0.0584	0.942	-2890.47	77	2500	0.0308	0.969
135	-2589.32	29.6721	27.2977	0.00284817	-3060.17	119	2500	0.0476	0.952	-2707.21	281	2500	0.1124	0.888
136	-2638.85	31.1985	22.7576	0.00243086	-3151.98	88	2500	0.0352	0.965	-2769.07	289	2500	0.1156	0.884
137	-2600	33.7569	19.5451	0.00340407	-3057.12	96	2500	0.0384	0.962	-2786.12	79	2500	0.0316	0.968
138	-2867.71	40.1484	17.5963	0.00104165	-3641.17	9	2500	0.0036	0.996	-3177.13	12	2500	0.0048	0.995
139	-2893.4	41.8538	19.4682	0.00198939	-3431.03	62	2500	0.0248	0.975	-3100.33	116	2500	0.0464	0.954
140	-2594.51	30.4386	26.9539	0.00418868	-3175.87	41	2500	0.0164	0.984	-2756.59	142	2500	0.0568	0.943
141	-2595.79	34.2733	20.4836	0.00307552	-3239.75	33	2500	0.0132	0.987	-2794.21	86	2500	0.0344	0.966
142	-2655.23	35.3105	16.244	0.000878579	-3068.91	119	2500	0.0476	0.952	-2831.6	137	2500	0.0548	0.945
143	-2503.22	28.95	21.8749	0.00204919	-2906.24	165	2500	0.066	0.934	-2653.69	147	2500	0.0588	0.941
144	-2477.95	28.1387	22.3411	0.00370933	-2875.39	193	2500	0.0772	0.923	-2616.54	196	2500	0.0784	0.922
145	-2706.65	38.3905	29.3056	0.00284418	-3531.36	4	2500	0.0016	0.998	-2852.06	232	2500	0.0928	0.907
146	-2706.8	35.3894	17.0017	0.00126573	-3038.43	216	2500	0.0864	0.914	-2904.84	77	2500	0.0308	0.969
147	-2379.93	26.5118	27.7097	0.00382693	-2833.72	120	2500	0.048	0.952	-2507.29	184	2500	0.0736	0.926
148	-2792.32	33.6525	26.3642	0.00324605	-3300.86	96	2500	0.0384	0.962	-2961.51	130	2500	0.052	0.948
149	-2837	32.2779	23.5854	0.00227408	-3394.07	67	2500	0.0268	0.973	-2999.91	176	2500	0.0704	0.93
150	-2894.34	32.088	32.0524	0.00349844	-3464.88	74	2500	0.0296	0.97	-2972	557	2500	0.2228	0.777
151	-3156.65	39.8585	21.4985	0.00264572	-3764.27	44	2500	0.0176	0.982	-3373.26	101	2500	0.0404	0.96
152	-2544.94	38.0319	16.7781	0.000939416	-3097.42	30	2500	0.012	0.988	-2713.81	151	2500	0.0604	0.94
153	-2900.87	27.8195	31.6342	0.00262798	-3349.51	183	2500	0.0732	0.927	-3022	318	2500	0.1272	0.873
154	-2378.66	27.8821	24.7759	0.00823455	-2730.51	215	2500	0.086	0.914	-2485.83	326	2500	0.1304	0.87
155	-2611.13	27.1083	34.4368	0.00429078	-3163.87	71	2500	0.0284	0.972	-2713.46	383	2500	0.1532	0.847
156	-2656.46	25.537	30.3428	0.00409233	-2981.62	326	2500	0.1304	0.87	-2783.65	254	2500	0.1016	0.898
157	-2876.67	42.7749	19.5648	0.00211743	-3568.44	15	2500	0.006	0.994	-3096.76	75	2500	0.03	0.97
158	-3101.46	42.7037	20.8036	0.00123314	-3862.36	15	2500	0.006	0.994	-3357.27	53	2500	0.0212	0.979
159	-2962.66	46.7252	17.1273	0.00172498	-3577.51	28	2500	0.0112	0.989	-3165.34	124	2500	0.0496	0.95
160	-2662.71	33.3716	19.0407	0.00196977	-3156.06	85	2500	0.034	0.966	-2808.29	234	2500	0.0936	0.906
161	-2952.05	38.7625	22.6203	0.0011438	-3719.12	10	2500	0.004	0.996	-3161.77	93	2500	0.0372	0.963
162	-2560.24	35.9412	20.839	0.0030128	-3188.25	21	2500	0.0084	0.992	-2746.35	93	2500	0.0372	0.963
163	-2814.8	34.0683	22.1871	0.00247387	-3274.32	101	2500	0.0404	0.96	-2934.31	357	2500	0.1428	0.857
164	-2777.93	36.5077	27.0211	0.00177381	-3379.52	40	2500	0.016	0.984	-2903	343	2500	0.1372	0.863
165	-2986.75	42.0505	20.4665	0.00183563	-3661.49	26	2500	0.0104	0.99	-3140.68	230	2500	0.092	0.908
166	-2574.91	35.8347	21.0801	0.00278399	-3235.71	23	2500	0.0092	0.991	-2763.15	111	2500	0.0444	0.956
167	-3255.29	38.2295	24.3282	0.00158027	-3964.47	28	2500	0.0112	0.989	-3459.25	128	2500	0.0512	0.949
168	-2420.57	26.8329	22.2672	0.00275927	-2661.9	441	2500	0.1764	0.824	-2511.75	409	2500	0.1636	0.836
169	-3130.13	42.9614	19.5323	0.00196497	-3851.57	16	2500	0.0064	0.994	-3306.66	216	2500	0.0864	0.914
170	-2410.25	27.3735	29.7235	0.00312908	-2891.3	100	2500	0.04	0.96	-2530.41	241	2500	0.0964	0.904
171	-2394.27	25.8994	36.9518	0.00620835	-3029.82	46	2500	0.0184	0.982	-2501.46	305	2500	0.122	0.878
172	-2824.46	35.6105	23.4221	0.00468653	-3318.17	90	2500	0.036	0.964	-2991.99	135	2500	0.054	0.946
173	-2794.25	37.6185	22.6794	0.00272141	-3279.26	79	2500	0.0316	0.968	-2901.36	416	2500	0.1664	0.834
174	-2670.47	36.057	19.3992	0.00198758	-3272.51	36	2500	0.0144	0.986	-2878.44	74	2500	0.0296	0.97
175	-3018.84	31.4671	25.6809	0.0021315	-3578.7	100	2500	0.04	0.96	-3201.47	143	2500	0.0572	0.943
176	-3051.01	46.9412	19.0542	0.00144769	-3706.12	13	2500	0.0052	0.995	-3284.83	78	2500	0.0312	0.969
177	-2584.68	27.9851	23.8715	0.00175582	-3029.53	132	2500	0.0528	0.947	-2725.11	209	2500	0.0836	0.916
178	-2375.78	32.337	23.2616	0.00317351	-2907.41	42	2500	0.0168	0.983	-2527.87	163	2500	0.0652	0.935
179	-2656.89	34.2756	20.7175	0.00165907	-3316.65	21	2500	0.0084	0.992	-2889.91	60	2500	0.024	0.976
180	-2362.98	26.5968	25.806	0.00370265	-2806.35	137	2500	0.0548	0.945	-2489.59	221	2500	0.0884	0.912
181	-2963.07	41.908	20.5764	0.00137314	-3687.43	12	2500	0.0048	0.995	-3182.43	91	2500	0.0364	0.964
182	-2879.08	39.464	21.3852	0.00219323	-3353.73	83	2500	0.0332	0.967	-3030.84	205	2500	0.082	0.918
183	-2681	36.5377	17.6505	0.00117438	-3191.64	51	2500	0.0204	0.98	-2867.29	101	2500	0.0404	0.96
184	-3017.54	40.1498	20.7246	0.00125838	-3500.04	103	2500	0.0412	0.959	-3179.55	206	2500	0.0824	0.918
185	-2581.91	35.7688	19.7218	0.00240976	-3066.87	61	2500	0.0244	0.976	-2727.02	203	2500	0.0812	0.919
186	-3113.37	36.8196	25.5711	0.0017227	-3901.12	13	2500	0.0052	0.995	-3377.57	22	2500	0.0088	0.991
187	-2715.17	38.8118	18.3759	0.00109877	-3246.81	66	2500	0.0264	0.974	-2858.47	236	2500	0.0944	0.906
188	-2634.04	50.3838	14.8606	0.00239163	-3138.97	29	2500	0.0116	0.988	-2813.81	151	2500	0.0604	0.94
189	-2436.24	26.2318	35.502	0.00414187	-2945.76	89	2500	0.0356	0.964	-2505.85	603	2500	0.2412	0.759
190	-2507.81	33.5465	32.4134	0.0087879	-3049.31	46	2500	0.0184	0.982	-2634.75	249	2500	0.0996	0.9
191	-2767.62	38.3847	18.9337	0.00264925	-3354.68	30	2500	0.012	0.988	-2966.86	87	2500	0.0348	0.965
192	-2213.02	36.9418	14.0654	0.00212962	-2611.22	78	2500	0.0312	0.969	-2347.53	249	2500	0.0996	0.9
193	-2946.26	39.7696	24.6556	0.00311924	-3765.67	6	2500	0.0024	0.998	-3169.86	79	2500	0.0316	0.968
194	-2801.64	30.7041	25.5782	0.00340207	-3354.68	88	2500	0.0352	0.965	-2992.94	93	2500	0.0372	0.963
195	-2695.76	36.1804	19.4424	0.00175698	-3099.25	147	2500	0.0588	0.941	-2843.12	231	2500	0.0924	0.908
196	-2887.06	33.1025	26.1572	0.00384675	-3401.9	107	2500	0.0428	0.957	-3051.3	148	2500	0.0592	0.941
197	-2409.02	37.7446	15.2835	0.00174832	-2792.29	105	2500	0.042	0.958	-2563.78	178	2500	0.0712	0.929
198	-2665.92	34.4787	27.898	0.00311441	-3420.02	14	2500	0.0056	0.994	-2818.6	199	2500	0.0796	0.92
199	-3301.86	47.3684	21.5274	0.00102662	-4196.73	2	2500	0.0008	0.999	-3567.1	39	2500	0.0156	0.984
200	-2211.41	29.2213	18.1382	0.00574287	-2527.57	221	2500	0.0884	0.912	-2294.39	483	2500	0.1932	0.807
201	-2929.16	44.1012	21.4494	0.00244715	-3600.18	10	2500	0.004	0.996	-3084.91	242	2500	0.0968	0.903
202	-2817.51	39.5119	24.3135	0.00266345	-3437.52	31	2500	0.0124	0.988	-2966.05	210	2500	0.084	0.916
203	-3073.68	43.608	21.918	0.00201843	-3877.56	8	2500	0.0032	0.997	-3286.45	76	2500	0.0304	0.97
204	-2529.71	27.7725	22.9168	0.00325104	-2947.84	169	2500	0.0676	0.932	-2708.86	80	2500	0.032	0.968
205	-2719.73	30.0025	24.8572	0.00393989	-3133.78	186	2500	0.0744	0.926	-2856.04	226	2500	0.0904	0.91
206	-2756	35.6377	22.3	0.00307018	-3204.22	99	2500	0.0396	0.96	-2939.93	96	2500	0.0384	0.962
207	-2192.07	30.8299	17.3341	0.00246568	-2599.95	99	2500	0.0396	0.96	-2294.59	350	2500	0.14	0.86
208	-2825.31	43.8377	18.1907	0.00133466	-3516.03	6	2500	0.0024	0.998	-3014.98	138	2500	0.0552	0.945
209	-2328.48	33.4524	17.2259	0.00232402	-2822.4	51	2500	0.0204	0.98	-2456.86	247	2500	0.0988	0.901
210	-2506.79	29.8902	24.4905	0.00201146	-3104.87	45	2500	0.018	0.982	-2685.88	102	2500	0.0408	0.959
211	-3015.21	38.0264	30.9891	0.00303875	-3767.82	23	2500	0.0092	0.991	-3199.43	104	2500	0.0416	0.958
212	-2659.46	34.7675	23.7343	0.00216918	-3187.09	48	2500	0.0192	0.981	-2806.5	174	2500	0.0696	0.93
213	-2346.78	25.1675	22.924	0.0036002	-2685.59	224	2500	0.0896	0.91	-2490.26	131	2500	0.0524	0.948
214	-2797.09	27.9757	29.5634	0.00186865	-3338.69	113	2500	0.0452	0.955	-2962.18	145	2500	0.058	0.942
215	-2958.62	35.4533	23.788	0.00150258	-3768.39	7	2500	0.0028	0.997	-3188.48	42	2500	0.0168	0.983
216	-2506.4	32.8987	19.3519	0.00269125	-3013.75	63	2500	0.0252	0.975	-2636.34	252	2500	0.1008	0.899
217	-2833.23	28.4378	29.775	0.00237158	-3422.58	80	2500	0.032	0.968	-3011.3	104	2500	0.0416	0.958
218	-3083.85	36.696	22.1278	0.00249855	-3646.58	79	2500	0.0316	0.968	-3277.72	108	2500	0.0432	0.957
219	-2457.68	35.7833	22.5823	0.00413386	-3051.83	30	2500	0.012	0.988	-2605.3	161	2500	0.0644	0.936
220	-2926.1	38.5528	21.9674	0.0020942	-3595.48	26	2500	0.0104	0.99	-3100.36	150	2500	0.06	0.94
221	-2482.9	33.066	20.3501	0.0065691	-2973.9	67	2500	0.0268	0.973	-2629.11	196	2500	0.0784	0.922
222	-2617.45	30.6778	25.5275	0.00405707	-2991.62	207	2500	0.0828	0.917	-2733.85	318	2500	0.1272	0.873
223	-2646.49	29.6115	26.0263	0.00117751	-3130.9	99	2500	0.0396	0.96	-2781.16	233	2500	0.0932	0.907
224	-2685.41	38.3629	16.0919	0.000896588	-3268.42	37	2500	0.0148	0.985	-2952.17	27	2500	0.0108	0.989
225	-3241.5	37.1931	28.3307	0.00194212	-3916.57	50	2500	0.02	0.98	-3423	145	2500	0.058	0.942
226	-2858.46	37.0671	23.8214	0.00272287	-3431.7	40	2500	0.016	0.984	-3058.74	70	2500	0.028	0.972
227	-2806.03	40.2822	20.1412	0.00174011	-3411.43	28	2500	0.0112	0.989	-3007.44	90	2500	0.036	0.964
228	-2396.77	33.9185	18.3547	0.00105838	-2946.86	41	2500	0.0164	0.984	-2487.47	463	2500	0.1852	0.815
229	-3061.31	39.3567	26.9001	0.00209605	-3833.71	12	2500	0.0048	0.995	-3268.23	91	2500	0.0364	0.964
230	-2586.66	27.8349	24.3741	0.000935295	-3046.91	134	2500	0.0536	0.946	-2731.36	192	2500	0.0768	0.923
231	-2681.25	36.0553	22.7103	0.00206879	-3265.97	47	2500	0.0188	0.981	-2857.5	130	2500	0.052	0.948
232	-2892.61	39.6545	20.0868	0.00386531	-3401.03	66	2500	0.0264	0.974	-3077.66	122	2500	0.0488	0.951
233	-2921.26	29.8332	28.5915	0.00185022	-3437.29	121	2500	0.0484	0.952	-3118.47	86	2500	0.0344	0.966
234	-2515.48	39.2218	18.2726	0.00300604	-3077.1	15	2500	0.006	0.994	-2681.83	153	2500	0.0612	0.939
235	-2341.55	33.1924	18.9538	0.00396139	-2816.85	52	2500	0.0208	0.979	-2502.78	156	2500	0.0624	0.938
236	-2682.55	42.6908	15.0072	0.00260026	-3108.57	89	2500	0.0356	0.964	-2863.39	127	2500	0.0508	0.949
237	-2718.65	37.7267	18.7793	0.00221039	-3234.25	60	2500	0.024	0.976	-2937.15	67	2500	0.0268	0.973
238	-2690.71	35.6196	22.2184	0.00403698	-3351.2	19	2500	0.0076	0.992	-2852.1	167	2500	0.0668	0.933
239	-2670.92	36.5819	17.1833	0.00154593	-3139	75	2500	0.03	0.97	-2813.23	255	2500	0.102	0.898
240	-2767.59	33.5877	24.4041	0.00237987	-3423.68	32	2500	0.0128	0.987	-2923.63	184	2500	0.0736	0.926
241	-3069.84	43.6681	23.5412	0.00282555	-3992.12	2	2500	0.0008	0.999	-3256.6	157	2500	0.0628	0.937
242	-2496.08	35.2688	25.5267	0.00317318	-3237.19	6	2500	0.0024	0.998	-2609.84	324	2500	0.1296	0.87
243	-2760.42	37.6282	19.7961	0.0027485	-3320.81	55	2500	0.022	0.978	-2972.09	87	2500	0.0348	0.965
244	-2458.65	28.5943	26.0649	0.00385521	-2908.2	114	2500	0.0456	0.954	-2613.87	134	2500	0.0536	0.946
245	-2613.48	34.6217	26.1591	0.00280248	-3300.28	11	2500	0.0044	0.996	-2789.66	118	2500	0.0472	0.953
246	-2827.15	37.0687	20.9033	0.00279338	-3327.26	87	2500	0.0348	0.965	-2960.77	272	2500	0.1088	0.891
247	-3121.05	37.0419	29.6691	0.0020884	-3720.8	58	2500	0.0232	0.977	-3251.62	279	2500	0.1116	0.888
248	-2674.81	40.7982	20.4326	0.00205951	-3314.54	11	2500	0.0044	0.996	-2889.56	68	2500	0.0272	0.973
249	-2872.97	33.6291	31.2955	0.00270739	-3601.05	19	2500	0.0076	0.992	-3030.25	174	2500	0.0696	0.93
250	-3019.63	36.1291	25.9566	0.00219714	-3803.65	16	2500	0.0064	0.994	-3240.6	75	2500	0.03	0.97
251	-2494.72	31.4741	27.1999	0.00608122	-3092.05	35	2500	0.014	0.986	-2589.52	410	2500	0.164	0.836
252	-2132.37	27.6022	17.1833	0.00276202	-2488.28	169	2500	0.0676	0.932	-2276.34	155	2500	0.062	0.938
253	-2380.16	30.5816	21.3598	0.00452792	-2802.5	120	2500	0.048	0.952	-2508.93	244	2500	0.0976	0.902
254	-2792.11	38.322	18.5204	0.00198949	-3393.96	41	2500	0.0164	0.984	-3009.03	70	2500	0.028	0.972
255	-2760.44	33.8001	22.215	0.00373976	-3244.17	103	2500	0.0412	0.959	-2908.75	242	2500	0.0968	0.903
256	-3260.26	51.2166	21.843	0.00220984	-4103.43	4	2500	0.0016	0.998	-3488.99	93	2500	0.0372	0.963
257	-2482.57	34.8473	19.6211	0.00210152	-3016.79	40	2500	0.016	0.984	-2665.79	97	2500	0.0388	0.961
258	-2658.58	29.0343	28.233	0.00494341	-3150.04	104	2500	0.0416	0.958	-2808	176	2500	0.0704	0.93
259	-2698.92	28.0467	25.5803	0.0017179	-3226.68	98	2500	0.0392	0.961	-2851.71	163	2500	0.0652	0.935
260	-2772.72	36.7137	18.4026	0.00140113	-3295.71	73	2500	0.0292	0.971	-2939.29	186	2500	0.0744	0.926
261	-2376.39	31.6338	17.3965	0.0022602	-2821.54	86	2500	0.0344	0.966	-2503.56	241	2500	0.0964	0.904
262	-2701.45	35.1743	20.7385	0.00277952	-3158.15	94	2500	0.0376	0.962	-2844.97	211	2500	0.0844	0.916
263	-2823.81	28.7681	48.5912	0.00379374	-3625.43	14	2500	0.0056	0.994	-2935.7	344	2500	0.1376	0.862
264	-2550.61	34.9281	20.0881	0.00383476	-2966.37	122	2500	0.0488	0.951	-2686.78	236	2500	0.0944	0.906
265	-2820.93	32.1033	24.1482	0.00198898	-3296.41	113	2500	0.0452	0.955	-2994.25	152	2500	0.0608	0.939
266	-3028.6	40.695	20.3264	0.00154652	-3567.82	73	2500	0.0292	0.971	-3195.18	188	2500	0.0752	0.925
267	-3130.56	35.9756	30.8637	0.00197776	-3946.41	13	2500	0.0052	0.995	-3300.56	148	2500	0.0592	0.941
268	-2481.43	35.5944	18.2337	0.00208881	-2922.54	79	2500	0.0316	0.968	-2623.46	214	2500	0.0856	0.914
269	-2717.31	38.0309	19.1955	0.00203372	-3235.99	53	2500	0.0212	0.979	-2901.15	135	2500	0.054	0.946
270	-2777.21	36.9064	24.3304	0.00252689	-3424.35	27	2500	0.0108	0.989	-2940.26	154	2500	0.0616	0.938
271	-3128.05	37.3027	20.9777	0.00283483	-3629.36	121	2500	0.0484	0.952	-3319.8	127	2500	0.0508	0.949
272	-2875.6	42.2708	20.5435	0.00212976	-3460.19	35	2500	0.014	0.986	-3052.72	145	2500	0.058	0.942
273	-3011.2	32.1767	31.0489	0.00212319	-3525.87	125	2500	0.05	0.95	-3180.34	163	2500	0.0652	0.935
274	-2691.55	37.2421	23.0978	0.0024738	-3328.9	33	2500	0.0132	0.987	-2885.01	69	2500	0.0276	0.972
275	-2456.95	36.298	16.7039	0.00123656	-2841.35	136	2500	0.0544	0.946	-2639.24	121	2500	0.0484	0.952
276	-2497.24	26.8459	25.9262	0.00307422	-2893.54	194	2500	0.0776	0.922	-2637.49	200	2500	0.08	0.92
277	-3122.81	41.2129	20.8311	0.00181563	-3973.68	11	2500	0.0044	0.996	-3379.07	52	2500	0.0208	0.979
278	-2569.1	30.1473	28.8953	0.00443557	-3105.35	77	2500	0.0308	0.969	-2691.14	275	2500	0.11	0.89
279	-3118.04	37.1791	24.2952	0.00170024	-3823.6	42	2500	0.0168	0.983	-3337.15	70	2500	0.028	0.972
280	-2821.9	39.6184	20.7311	0.00202481	-3481.59	22	2500	0.0088	0.991	-3049.11	52	2500	0.0208	0.979
281	-2813.35	39.514	21.2097	0.00231571	-3473.17	23	2500	0.0092	0.991	-2984.54	144	2500	0.0576	0.942
282	-2694.03	32.3637	23.1005	0.00147785	-3169.77	102	2500	0.0408	0.959	-2848.88	159	2500	0.0636	0.936
283	-2928.06	34.1973	23.6752	0.00219044	-3539.48	41	2500	0.0164	0.984	-3085.08	207	2500	0.0828	0.917
284	-2599.93	38.7758	18.5498	0.00210835	-3174.59	18	2500	0.0072	0.993	-2824.83	53	2500	0.0212	0.979
285	-2793.06	36.5563	20.4239	0.00197997	-3369.22	37	2500	0.0148	0.985	-2956.33	183	2500	0.0732	0.927
286	-2382.3	31.7349	20.1517	0.0020141	-2879.52	63	2500	0.0252	0.975	-2539.19	147	2500	0.0588	0.941
287	-2648.89	34.7064	18.5496	0.00195571	-3057.26	140	2500	0.056	0.944	-2750.13	423	2500	0.1692	0.831
288	-2573.71	35.0207	20.0694	0.00191528	-3138.48	42	2500	0.0168	0.983	-2746.76	120	2500	0.048	0.952
289	-2758.36	40.3434	22.9592	0.00324844	-3467.57	9	2500	0.0036	0.996	-2942.59	118	2500	0.0472	0.953
290	-2635.53	35.5906	22.7463	0.00317625	-3143.14	69	2500	0.0276	0.972	-2787.53	184	2500	0.0736	0.926
291	-2895.59	35.0026	26.1236	0.00364798	-3496.41	45	2500	0.018	0.982	-3078.68	97	2500	0.0388	0.961
292	-2999.83	36.895	22.2237	0.00168253	-3690.93	29	2500	0.0116	0.988	-3242.1	43	2500	0.0172	0.983
293	-2531.17	32.3124	19.7753	0.00299169	-2995.91	106	2500	0.0424	0.958	-2724.56	70	2500	0.028	0.972
294	-3363.55	40.8647	22.1195	0.00115666	-3941.36	79	2500	0.0316	0.968	-3524.14	235	2500	0.094	0.906
295	-2215.02	25.7752	19.7896	0.00231722	-2630.24	145	2500	0.058	0.942	-2371.23	114	2500	0.0456	0.954
296	-2246.42	30.4154	23.8821	0.00461277	-2695.18	77	2500	0.0308	0.969	-2376.18	202	2500	0.0808	0.919
297	-2299.87	36.5547	15.0521	0.00356877	-2659.06	126	2500	0.0504	0.95	-2469.25	96	2500	0.0384	0.962
298	-2652.79	31.3532	29.128	0.0042398	-3330.7	28	2500	0.0112	0.989	-2797.36	196	2500	0.0784	0.922
299	-2734.64	38.5491	19.8009	0.00326103	-3308.79	29	2500	0.0116	0.988	-2912.07	130	2500	0.052	0.948
300	-2675.38	34.355	20.6531	0.00364339	-3351.73	17	2500	0.0068	0.993	-2843.11	155	2500	0.062	0.938
301	-2632.64	31.5077	25.6165	0.00340295	-3196.9	60	2500	0.024	0.976	-2819.84	92	2500	0.0368	0.963
302	-2981.17	35.9264	24.7729	0.00219126	-3594.9	44	2500	0.0176	0.982	-3146.25	160	2500	0.064	0.936
303	-3034.77	42.1052	26.4269	0.00270493	-3735.24	13	2500	0.0052	0.995	-3164.24	317	2500	0.1268	0.873
304	-3193.56	46.6871	26.7517	0.00227729	-4003.81	8	2500	0.0032	0.997	-3356.95	243	2500	0.0972	0.903
305	-2772.61	29.7956	36.6422	0.00385467	-3408.25	40	2500	0.016	0.984	-2884.16	376	2500	0.1504	0.85
306	-2545.65	30.2869	28.7864	0.00364109	-3216.81	20	2500	0.008	0.992	-2670.08	280	2500	0.112	0.888
307	-3027.53	40.2179	18.1341	0.00105163	-3600.9	55	2500	0.022	0.978	-3250.07	65	2500	0.026	0.974
308	-2426.74	33.1787	18.7941	0.00333551	-2913.66	58	2500	0.0232	0.977	-2617.04	75	2500	0.03	0.97
309	-2853.03	30.0093	26.8229	0.00195577	-3379.29	109	2500	0.0436	0.956	-3103.42	20	2500	0.008	0.992
310	-2676.48	32.7115	28.2586	0.00425529	-3273.65	43	2500	0.0172	0.983	-2851.57	117	2500	0.0468	0.953
311	-3270.85	43.1769	19.9769	0.00128508	-3915.73	33	2500	0.0132	0.987	-3478.21	119	2500	0.0476	0.952
312	-2310.32	28.4269	21.2874	0.00270044	-2776.38	71	2500	0.0284	0.972	-2428.32	282	2500	0.1128	0.887
313	-3355.44	44.3943	28.7935	0.00152152	-4192.28	10	2500	0.004	0.996	-3553.49	148	2500	0.0592	0.941
314	-3054.59	35.4376	25.964	0.00270215	-3707.1	47	2500	0.0188	0.981	-3260.28	74	2500	0.0296	0.97
315	-2805.83	37.3645	23.2578	0.00246405	-3368.67	44	2500	0.0176	0.982	-2979.5	157	2500	0.0628	0.937
316	-2714.75	34.0583	17.0926	0.00196014	-3052.59	232	2500	0.0928	0.907	-2902.97	111	2500	0.0444	0.956
317	-2506.41	36.1642	17.7719	0.00243242	-2946.03	85	2500	0.034	0.966	-2626.54	328	2500	0.1312	0.869
318	-3214.08	33.982	26.8591	0.00160951	-3823.63	76	2500	0.0304	0.97	-3388.57	148	2500	0.0592	0.941
319	-2789.74	33.773	22.6263	0.0021054	-3329.27	88	2500	0.0352	0.965	-2942.31	189	2500	0.0756	0.924
320	-3355.69	52.0867	15.8127	0.00101689	-3877.28	70	2500	0.028	0.972	-3627.66	56	2500	0.0224	0.978
321	-2937.91	42.3185	22.1565	0.00295234	-3583.7	17	2500	0.0068	0.993	-3096.44	208	2500	0.0832	0.917
322	-2754.88	28.9061	24.9671	0.00571529	-3164.63	188	2500	0.0752	0.925	-2928.69	116	2500	0.0464	0.954
323	-2828.28	38.1641	20.6423	0.00192263	-3388.27	49	2500	0.0196	0.98	-2980.2	216	2500	0.0864	0.914
324	-2504.53	28.3924	30.7733	0.00492886	-2942.44	138	2500	0.0552	0.945	-2617.81	287	2500	0.1148	0.885
325	-2878.22	37.1494	23.3172	0.00289733	-3522.58	25	2500	0.01	0.99	-3021.4	242	2500	0.0968	0.903
326	-3185.79	40.1321	24.355	0.0012067	-3787.87	51	2500	0.0204	0.98	-3370.74	115	2500	0.046	0.954
327	-3039.13	31.1864	31.4065	0.00365217	-3732.9	51	2500	0.0204	0.98	-3215.88	127	2500	0.0508	0.949
328	-2812.46	33.9036	34.4578	0.00432125	-3518.93	29	2500	0.0116	0.988	-2948.41	263	2500	0.1052	0.895
329	-2932.21	29.3684	24.9887	0.00205959	-3305.3	268	2500	0.1072	0.893	-3107.8	138	2500	0.0552	0.945
330	-2493.95	33.0659	16.7824	0.00213044	-2843.19	173	2500	0.0692	0.931	-2633.48	219	2500	0.0876	0.912
331	-2777.65	34.9268	18.3522	0.00254631	-3225.02	131	2500	0.0524	0.948	-2964.97	95	2500	0.038	0.962
332	-2624.91	30.7071	24.4119	0.00711424	-3122.33	105	2500	0.042	0.958	-2792.48	118	2500	0.0472	0.953
333	-3126.38	39.6984	32.4413	0.00315909	-3842.78	16	2500	0.0064	0.994	-3236.92	455	2500	0.182	0.818
334	-2586.17	28.8049	24.3981	0.00265599	-3047.26	132	2500	0.0528	0.947	-2711.78	241	2500	0.0964	0.904
335	-2717.07	37.3211	19.9977	0.00219808	-3246.08	52	2500	0.0208	0.979	-2911.03	76	2500	0.0304	0.97
336	-2674.3	35.138	21.3703	0.00207375	-3229.22	43	2500	0.0172	0.983	-2837.72	149	2500	0.0596	0.94
337	-2827.9	34.2366	20.7404	0.00278791	-3223.78	193	2500	0.0772	0.923	-2973.67	272	2500	0.1088	0.891
338	-2900.7	34.4996	24.3864	0.00162903	-3657.84	12	2500	0.0048	0.995	-3121.02	75	2500	0.03	0.97
339	-2357.97	29.9876	28.9449	0.00502391	-2919.99	30	2500	0.012	0.988	-2464.16	372	2500	0.1488	0.851
340	-2612.09	36.7947	16.5612	0.00296058	-2986.85	140	2500	0.056	0.944	-2758.62	209	2500	0.0836	0.916
341	-2474.21	35.4123	15.8464	0.00222705	-2837.4	144	2500	0.0576	0.942	-2655.42	104	2500	0.0416	0.958
342	-2417.88	27.4417	24.0059	0.00308682	-2893.43	90	2500	0.036	0.964	-2548.44	209	2500	0.0836	0.916
343	-3076.73	39.1242	24.0931	0.00504241	-3862.58	14	2500	0.0056	0.994	-3260.25	119	2500	0.0476	0.952
344	-2441.9	29.163	24.0823	0.00301493	-2868.37	130	2500	0.052	0.948	-2601.77	130	2500	0.052	0.948
345	-2929.63	37.7992	28.5489	0.00280936	-3703.17	15	2500	0.006	0.994	-3117.82	114	2500	0.0456	0.954
346	-2269.19	27.3087	27.0954	0.00252176	-2725.37	117	2500	0.0468	0.953	-2381.53	295	2500	0.118	0.882
347	-2448.48	31.2682	19.8471	0.00272555	-2849.2	120	2500	0.048	0.952	-2610.31	141	2500	0.0564	0.944
348	-2563.55	32.5472	23.1204	0.00421128	-3070.15	66	2500	0.0264	0.974	-2704.33	217	2500	0.0868	0.913
349	-2403.22	34.574	17.358	0.00298258	-2855.04	82	2500	0.0328	0.967	-2551.75	180	2500	0.072	0.928
350	-2281.7	42.9544	14.1389	0.00328691	-2687.81	50	2500	0.02	0.98	-2409.98	292	2500	0.1168	0.883
351	-2641.97	31.8298	24.2827	0.00300101	-3282.04	39	2500	0.0156	0.984	-2797.25	164	2500	0.0656	0.934
352	-2699.9	39.6886	16.1064	0.00173934	-3146.1	78	2500	0.0312	0.969	-2870.65	132	2500	0.0528	0.947
353	-2851.22	38.1071	22.1255	0.00270796	-3513.58	23	2500	0.0092	0.991	-3035.63	129	2500	0.0516	0.948
354	-2720.11	31.9694	23.836	0.00309364	-3164.81	146	2500	0.0584	0.942	-2847.9	306	2500	0.1224	0.878
355	-2629.34	34.1514	20.7357	0.00212571	-3240.72	35	2500	0.014	0.986	-2829.27	79	2500	0.0316	0.968
356	-2425.68	31.7851	19.3243	0.0025439	-2905.09	70	2500	0.028	0.972	-2582.69	165	2500	0.066	0.934
357	-2658.53	37.4779	19.1889	0.00275058	-3210.18	37	2500	0.0148	0.985	-2854	93	2500	0.0372	0.963
358	-2874.34	38.9865	19.0021	0.00114193	-3492.8	20	2500	0.008	0.992	-3114.66	43	2500	0.0172	0.983
359	-2933.39	31.7352	31.6618	0.00258203	-3633.18	31	2500	0.0124	0.988	-3077.97	258	2500	0.1032	0.897
360	-2563.2	34.9592	20.8198	0.00354984	-3129.62	41	2500	0.0164	0.984	-2727.93	147	2500	0.0588	0.941
361	-3111.24	35.0513	34.9404	0.00233751	-3892.02	12	2500	0.0048	0.995	-3284.03	132	2500	0.0528	0.947
362	-2210.44	26.2819	27.0694	0.00778904	-2739.14	64	2500	0.0256	0.974	-2318.57	320	2500	0.128	0.872
363	-2770.3	41.1242	18.0351	0.00169364	-3360.74	40	2500	0.016	0.984	-2986.33	76	2500	0.0304	0.97
364	-2282.45	28.1189	24.3606	0.00564624	-2766.33	97	2500	0.0388	0.961	-2382.6	357	2500	0.1428	0.857
365	-2603.31	33.0327	23.744	0.003782	-3108.67	61	2500	0.0244	0.976	-2730.31	262	2500	0.1048	0.895
366	-2372.71	31.3662	24.4621	0.00295676	-3012.25	19	2500	0.0076	0.992	-2519.27	168	2500	0.0672	0.933
367	-2580.61	29.1454	29.6291	0.00254954	-3354.08	14	2500	0.0056	0.994	-2756.7	117	2500	0.0468	0.953
368	-2596.04	31.8588	22.616	0.00364346	-3032.13	125	2500	0.05	0.95	-2735.43	185	2500	0.074	0.926
369	-2705.64	36.3727	18.2675	0.0018149	-3263.27	52	2500	0.0208	0.979	-2956.39	36	2500	0.0144	0.986
370	-2685.12	33.8788	27.4528	0.00337457	-3415.96	14	2500	0.0056	0.994	-2849.29	162	2500	0.0648	0.935
371	-2714.64	34.6275	21.8905	0.00356346	-3232.77	75	2500	0.03	0.97	-2906.69	97	2500	0.0388	0.961
372	-2633.56	29.8094	25.8661	0.00339876	-3083.4	137	2500	0.0548	0.945	-2793.34	145	2500	0.058	0.942
373	-2455.89	35.1252	18.6752	0.00245705	-2904.63	70	2500	0.028	0.972	-2575	325	2500	0.13	0.87
374	-2355.31	26.5042	29.0363	0.00378118	-2806.39	111	2500	0.0444	0.956	-2437.81	458	2500	0.1832	0.817
375	-3150.55	39.855	23.0369	0.000364775	-3825.07	29	2500	0.0116	0.988	-3364.63	94	2500	0.0376	0.962
376	-2551.59	46.0599	15.3005	0.0024286	-3008.96	47	2500	0.0188	0.981	-2697.32	239	2500	0.0956	0.904
377	-2852.02	32.8134	21.6675	0.00138209	-3421.43	62	2500	0.0248	0.975	-3125.23	16	2500	0.0064	0.994
378	-2207.67	30.301	23.059	0.00362011	-2702.6	63	2500	0.0252	0.975	-2343.37	223	2500	0.0892	0.911
379	-3224.69	47.8345	21.641	0.00307068	-3872.48	22	2500	0.0088	0.991	-3406.31	181	2500	0.0724	0.928
380	-2708.78	35.5189	21.4574	0.00261479	-3295.12	46	2500	0.0184	0.982	-2903.53	86	2500	0.0344	0.966
381	-2662.2	30.2251	26.8678	0.00244924	-3213.66	84	2500	0.0336	0.966	-2802.15	237	2500	0.0948	0.905
382	-2644.04	38.1294	19.6281	0.00386548	-3099.05	71	2500	0.0284	0.972	-2815.13	143	2500	0.0572	0.943
383	-2496.7	32.8736	17.3648	0.00112314	-2825.12	188	2500	0.0752	0.925	-2607.65	346	2500	0.1384	0.862
384	-2690.02	32.4411	20.5438	0.00115851	-3179.65	99	2500	0.0396	0.96	-2821.47	255	2500	0.102	0.898
385	-2991.81	43.791	24.5526	0.00187841	-3889.95	6	2500	0.0024	0.998	-3204.12	82	2500	0.0328	0.967
386	-2600.7	31.6021	36.2323	0.00464264	-3265.88	27	2500	0.0108	0.989	-2706.97	369	2500	0.1476	0.852
387	-2779.86	31.7747	27.7851	0.00360949	-3287.2	107	2500	0.0428	0.957	-2937.01	156	2500	0.0624	0.938
388	-2592.52	33.6586	18.3185	0.00282461	-3039.87	109	2500	0.0436	0.956	-2781.67	87	2500	0.0348	0.965
389	-2908.64	35.5256	21.9196	0.00220798	-3470.43	56	2500	0.0224	0.978	-3078.97	173	2500	0.0692	0.931
390	-2795.88	35.3235	25.4403	0.00438197	-3286.74	117	2500	0.0468	0.953	-2909.49	373	2500	0.1492	0.851
391	-2481.35	35.2841	17.6355	0.00155034	-2927.37	85	2500	0.034	0.966	-2653.82	101	2500	0.0404	0.96
392	-2816.71	40.4816	25.0536	0.00226793	-3550.85	10	2500	0.004	0.996	-2976.98	215	2500	0.086	0.914
393	-2849.66	34.5414	28.0333	0.00264354	-3426.89	61	2500	0.0244	0.976	-3003.99	228	2500	0.0912	0.909
394	-3163.88	33.5121	21.9828	0.00105704	-3710.7	87	2500	0.0348	0.965	-3361.46	107	2500	0.0428	0.957
395	-2749.15	33.8391	19.8094	0.00247177	-3087.94	245	2500	0.098	0.902	-2893.65	225	2500	0.09	0.91
396	-2954.11	41.61	22.4152	0.00301802	-3690.36	10	2500	0.004	0.996	-3156.6	84	2500	0.0336	0.966
397	-3304.48	40.6847	29.4321	0.0013673	-4235	8	2500	0.0032	0.997	-3504.07	133	2500	0.0532	0.947
398	-3027.53	41.1298	22.4028	0.00250255	-3561.72	74	2500	0.0296	0.97	-3214.53	136	2500	0.0544	0.946
399	-2499.55	33.4542	16.0788	0.0013045	-2825.38	250	2500	0.1	0.9	-2634.34	206	2500	0.0824	0.918
400	-2979.96	37.6561	22.115	0.00178959	-3617.98	27	2500	0.0108	0.989	-3205.09	51	2500	0.0204	0.98
401	-2558.32	44.8514	13.1167	0.00250625	-3066.03	29	2500	0.0116	0.988	-2750.53	104	2500	0.0416	0.958
402	-3172.2	44.0154	17.6085	0.000804071	-3707.56	75	2500	0.03	0.97	-3439.95	38	2500	0.0152	0.985
403	-2653.38	31.0346	21.0464	0.00293091	-3091.39	131	2500	0.0524	0.948	-2816.87	130	2500	0.052	0.948
404	-2786.43	32.3446	25.2415	0.00225616	-3434.53	42	2500	0.0168	0.983	-2950.43	158	2500	0.0632	0.937
405	-2884.59	40.6733	20.314	0.00203066	-3505.92	30	2500	0.012	0.988	-3037.72	197	2500	0.0788	0.921
406	-2398.73	29.9812	17.9731	0.00304005	-2723.55	234	2500	0.0936	0.906	-2540.6	201	2500	0.0804	0.92
407	-2909.61	41.9034	22.3576	0.00152304	-3601.1	16	2500	0.0064	0.994	-3037.85	358	2500	0.1432	0.857
408	-2697.8	28.2832	27.954	0.0040118	-3135.44	184	2500	0.0736	0.926	-2868.34	113	2500	0.0452	0.955
409	-2396.17	33.684	17.5639	0.0035161	-2841.92	89	2500	0.0356	0.964	-2537.89	216	2500	0.0864	0.914
410	-3289.51	46.7837	22.6326	0.0014734	-4038.27	19	2500	0.0076	0.992	-3585.51	24	2500	0.0096	0.99
411	-3266.83	43.3125	26.086	0.00136265	-4102.68	4	2500	0.0016	0.998	-3455.05	171	2500	0.0684	0.932
412	-2560.34	44.2747	14.3343	0.00117827	-3019.76	64	2500	0.0256	0.974	-2699.36	288	2500	0.1152	0.885
413	-3213.16	45.5238	19.3368	0.000968139	-3957.44	17	2500	0.0068	0.993	-3504.17	31	2500	0.0124	0.988
414	-3399.96	33.6738	35.012	0.00174274	-4151.14	35	2500	0.014	0.986	-3631.77	73	2500	0.0292	0.971
415	-2733.32	33.2781	29.3023	0.00222218	-3365.04	37	2500	0.0148	0.985	-2915.03	115	2500	0.046	0.954
416	-2392.2	29.8259	20.3926	0.00320763	-2743.79	210	2500	0.084	0.916	-2547.99	114	2500	0.0456	0.954
417	-2870.47	42.164	19.9653	0.00247428	-3521.76	17	2500	0.0068	0.993	-2982.33	440	2500	0.176	0.824
418	-2806.5	34.1972	23.4256	0.00343028	-3237.13	146	2500	0.0584	0.942	-2965.78	156	2500	0.0624	0.938
419	-2513.83	32.3705	23.0053	0.00278332	-3010.24	67	2500	0.0268	0.973	-2640.29	246	2500	0.0984	0.902
420	-2485.81	28.6384	20.0829	0.00237001	-2877.08	167	2500	0.0668	0.933	-2630.77	167	2500	0.0668	0.933
421	-2926.05	30.5928	28.2688	0.00317123	-3456.78	109	2500	0.0436	0.956	-3108.83	92	2500	0.0368	0.963
422	-2499.18	37.515	14.9809	0.00132977	-3006.79	35	2500	0.014	0.986	-2700.23	68	2500	0.0272	0.973
423	-3059.61	39.2188	24.4407	0.00198965	-3749.07	22	2500	0.0088	0.991	-3209.61	279	2500	0.1116	0.888
424	-2360.9	33.2142	21.8597	0.00398702	-2822.38	69	2500	0.0276	0.972	-2465.69	336	2500	0.1344	0.866
425	-2640.08	27.0534	29.3787	0.00271205	-3117.36	140	2500	0.056	0.944	-2772.26	199	2500	0.0796	0.92
426	-2674.96	34.7758	20.2641	0.00267094	-3129	105	2500	0.042	0.958	-2828.99	186	2500	0.0744	0.926
427	-2759.58	44.2075	15.987	0.00114959	-3327.5	20	2500	0.008	0.992	-2905.04	288	2500	0.1152	0.885
428	-2894.88	38.4377	22.863	0.00159923	-3534.16	26	2500	0.0104	0.99	-3068.2	153	2500	0.0612	0.939
429	-2584.62	27.1838	34.534	0.00511015	-3056.51	130	2500	0.052	0.948	-2692.58	345	2500	0.138	0.862
430	-2836.46	43.1731	19.2926	0.00257093	-3363.94	39	2500	0.0156	0.984	-2979.65	227	2500	0.0908	0.909
431	-2438.51	33.1378	20.2054	0.00231774	-2979.18	50	2500	0.02	0.98	-2618.3	95	2500	0.038	0.962
432	-2982.29	35.6673	24.8178	0.00208241	-3675.87	27	2500	0.0108	0.989	-3169.96	114	2500	0.0456	0.954
433	-3114.39	32.9979	28.5616	0.00170922	-3829.61	38	2500	0.0152	0.985	-3338.22	49	2500	0.0196	0.98
434	-2548.5	30.4363	27.8138	0.00436632	-3247.34	18	2500	0.0072	0.993	-2720.76	98	2500	0.0392	0.961
435	-3208.51	45.9922	20.2225	0.00151414	-3861.88	31	2500	0.0124	0.988	-3393.59	166	2500	0.0664	0.934
436	-2818.92	33.1513	23.396	0.00195038	-3303.11	114	2500	0.0456	0.954	-2980.88	146	2500	0.0584	0.942
437	-2306.23	28.258	22.2679	0.00346544	-2761.99	100	2500	0.04	0.96	-2442.79	209	2500	0.0836	0.916
438	-2909	36.2697	25.0012	0.00342201	-3616.72	18	2500	0.0072	0.993	-3084	139	2500	0.0556	0.944
439	-2449.72	34.2392	20.9044	0.00395524	-3018.32	27	2500	0.0108	0.989	-2589.13	228	2500	0.0912	0.909
440	-2168.28	22.8427	24.5295	0.00390024	-2518.64	208	2500	0.0832	0.917	-2300.93	159	2500	0.0636	0.936
441	-2911.47	40.7372	15.5426	0.00121649	-3461.23	47	2500	0.0188	0.981	-3228.46	8	2500	0.0032	0.997
442	-2885.13	33.5327	20.055	0.000887195	-3336.71	165	2500	0.066	0.934	-3077.48	90	2500	0.036	0.964
443	-2853.1	36.4711	18.2224	0.00120636	-3350.42	102	2500	0.0408	0.959	-3075.84	64	2500	0.0256	0.974
444	-2408.55	31.0473	25.1839	0.00780287	-2836.29	108	2500	0.0432	0.957	-2557.9	130	2500	0.052	0.948
445	-2466.46	27.7564	24.5636	0.00349881	-2822.51	210	2500	0.084	0.916	-2592.21	239	2500	0.0956	0.904
446	-2658.7	41.2281	24.6283	0.00318004	-3395.74	3	2500	0.0012	0.999	-2813.7	195	2500	0.078	0.922
447	-2962.83	34.9616	21.9889	0.00218431	-3552.95	59	2500	0.0236	0.976	-3168.68	87	2500	0.0348	0.965
448	-2947.42	38.9496	26.1601	0.00237568	-3703.27	10	2500	0.004	0.996	-3080.31	296	2500	0.1184	0.882
449	-2696.84	42.2554	17.7921	0.00283897	-3273.27	24	2500	0.0096	0.99	-2893.04	99	2500	0.0396	0.96
450	-2866.72	33.4593	22.5204	0.00261464	-3272.74	188	2500	0.0752	0.925	-3068.01	80	2500	0.032	0.968
451	-2599.42	34.5434	20.8646	0.0027413	-3085.23	108	2500	0.0432	0.957	-2759.69	155	2500	0.062	0.938
452	-2507.5	32.8986	19.6621	0.00237843	-2969.22	81	2500	0.0324	0.968	-2667.37	131	2500	0.0524	0.948
453	-2954.66	39.3392	20.3736	0.00148485	-3475.77	85	2500	0.034	0.966	-3085.39	293	2500	0.1172	0.883
454	-2441.19	40.1082	22.0895	0.00474583	-3143.19	4	2500	0.0016	0.998	-2597.66	160	2500	0.064	0.936
455	-2372.9	28.3236	23.5547	0.00582294	-2770.71	155	2500	0.062	0.938	-2494.91	254	2500	0.1016	0.898
456	-2514.87	29.9517	27.1601	0.00240398	-3032.3	74	2500	0.0296	0.97	-2632.64	274	2500	0.1096	0.89
457	-2366.31	35.3488	17.2889	0.006251	-2858.03	37	2500	0.0148	0.985	-2524.04	160	2500	0.064	0.936
458	-2339.81	27.0697	22.7341	0.00676463	-2637.82	303	2500	0.1212	0.879	-2449.43	293	2500	0.1172	0.883
459	-2606.78	35.6793	20.2282	0.00210494	-3079.09	71	2500	0.0284	0.972	-2755.11	204	2500	0.0816	0.918
460	-2850.69	40.2621	18.0443	0.0015294	-3453.23	34	2500	0.0136	0.986	-3063.41	98	2500	0.0392	0.961
461	-2483.3	32.1319	26.6007	0.00485298	-3058.35	32	2500	0.0128	0.987	-2603.89	267	2500	0.1068	0.893
462	-2733.76	31.0076	25.0403	0.0030444	-3164.7	157	2500	0.0628	0.937	-2866.6	251	2500	0.1004	0.9
463	-2611.67	30.75	32.0053	0.00453116	-3429.03	8	2500	0.0032	0.997	-2809.32	55	2500	0.022	0.978
464	-3312.03	44.4864	23.2877	0.00182564	-3953.72	28	2500	0.0112	0.989	-3439.31	339	2500	0.1356	0.864
465	-2763.79	42.0821	20.2657	0.00533974	-3335.07	31	2500	0.0124	0.988	-2925.9	169	2500	0.0676	0.932
466	-2836.83	40.1641	19.8749	0.00234738	-3417.35	37	2500	0.0148	0.985	-2963.09	316	2500	0.1264	0.874
467	-2490.44	30.1336	20.8634	0.00619117	-2931.39	128	2500	0.0512	0.949	-2606.76	319	2500	0.1276	0.872
468	-2889.44	35.6028	26.141	0.00187203	-3456.58	62	2500	0.0248	0.975	-3070.99	127	2500	0.0508	0.949
469	-2863.25	34.4935	25.1436	0.00185681	-3536.6	38	2500	0.0152	0.985	-3054.61	93	2500	0.0372	0.963
470	-3052.76	38.2412	21.8571	0.00117377	-3746.57	21	2500	0.0084	0.992	-3276.9	67	2500	0.0268	0.973
471	-2629.65	41.0369	23.5321	0.00195929	-3362.61	9	2500	0.0036	0.996	-2762.72	264	2500	0.1056	0.894
472	-3068.62	38.0009	23.5121	0.00404162	-3743.39	21	2500	0.0084	0.992	-3262.54	116	2500	0.0464	0.954
473	-2519	31.2965	22.9024	0.00253365	-3049.5	71	2500	0.0284	0.972	-2648.52	275	2500	0.11	0.89
474	-2593.85	35.7316	18.9481	0.00234255	-3009.34	122	2500	0.0488	0.951	-2741.87	210	2500	0.084	0.916
475	-2413.25	31.3254	23.1859	0.00369823	-2885.36	59	2500	0.0236	0.976	-2559.51	171	2500	0.0684	0.932
476	-2617.73	34.0469	20.4564	0.00318322	-3121.31	70	2500	0.028	0.972	-2793.04	111	2500	0.0444	0.956
477	-2756.72	39.8519	20.3749	0.00246003	-3426.67	22	2500	0.0088	0.991	-2931.58	150	2500	0.06	0.94
478	-2715.65	33.4838	29.4656	0.00234392	-3471.88	10	2500	0.004	0.996	-2870.17	175	2500	0.07	0.93
479	-2306.29	28.8753	26.223	0.00398513	-2773.8	97	2500	0.0388	0.961	-2383.69	496	2500	0.1984	0.802
480	-3409.43	42.5459	23.8907	0.0011108	-4127.84	18	2500	0.0072	0.993	-3630.46	76	2500	0.0304	0.97
481	-3044.09	46.2192	25.9164	0.00200989	-3774.05	11	2500	0.0044	0.996	-3202.61	262	2500	0.1048	0.895
482	-3114.97	45.1549	22.9042	0.00249819	-3953.82	2	2500	0.0008	0.999	-3297.08	135	2500	0.054	0.946
483	-2575.75	29.0158	27.3448	0.002991	-3082.51	82	2500	0.0328	0.967	-2729.41	119	2500	0.0476	0.952
484	-3026.7	45.1987	19.1486	0.00124051	-3951.03	3	2500	0.0012	0.999	-3351.95	8	2500	0.0032	0.997
485	-3034.75	46.1005	16.9963	0.00101337	-3549.82	54	2500	0.0216	0.978	-3223.12	167	2500	0.0668	0.933
486	-2969.42	36.8907	24.1715	0.00160423	-3769.93	12	2500	0.0048	0.995	-3226.68	35	2500	0.014	0.986
487	-2719.92	40.2915	17.8426	0.00232112	-3280.79	39	2500	0.0156	0.984	-2916.15	103	2500	0.0412	0.959
488	-2562.09	29.5969	24.5324	0.00241459	-3095.74	76	2500	0.0304	0.97	-2718.51	154	2500	0.0616	0.938
489	-2681.81	33.1621	19.0449	0.00128448	-3104.55	147	2500	0.0588	0.941	-2876.01	77	2500	0.0308	0.969
490	-2625.46	36.308	26.1609	0.00507504	-3233.41	37	2500	0.0148	0.985	-2774.78	210	2500	0.084	0.916
491	-2870.7	39.059	18.825	0.00202998	-3383.27	78	2500	0.0312	0.969	-3030.77	174	2500	0.0696	0.93
492	-2795.03	34.5503	21.9632	0.001327	-3272.88	81	2500	0.0324	0.968	-2937.5	225	2500	0.09	0.91
493	-2884.37	35.5277	19.5904	0.00189497	-3439.42	65	2500	0.026	0.974	-3080.65	95	2500	0.038	0.962
494	-2837.62	31.8562	28.9645	0.00183297	-3623.88	18	2500	0.0072	0.993	-3014.41	146	2500	0.0584	0.942
495	-2708.39	37.9748	21.2075	0.00145901	-3360.14	16	2500	0.0064	0.994	-2893.48	119	2500	0.0476	0.952
496	-3436.69	43.2604	27.7241	0.00131007	-4308.24	9	2500	0.0036	0.996	-3649.56	103	2500	0.0412	0.959
497	-3311.48	38.0422	30.0951	0.00183315	-4159.83	10	2500	0.004	0.996	-3522.34	106	2500	0.0424	0.958
498	-2505.26	31.2215	19.4016	0.0019757	-3005.81	71	2500	0.0284	0.972	-2692.88	85	2500	0.034	0.966
499	-2902.25	36.5655	26.33	0.00431051	-3555.19	41	2500	0.0164	0.984	-3067.18	185	2500	0.074	0.926
500	-3189.43	42.1374	22.2743	0.00166591	-3898.04	26	2500	0.0104	0.99	-3370.54	162	2500	0.0648	0.935
501	-2885.56	41.9248	17.8402	0.00144981	-3500.94	29	2500	0.0116	0.988	-3157.36	27	2500	0.0108	0.989
502	-3438.48	44.4309	24.2997	0.0013443	-4161.81	32	2500	0.0128	0.987	-3645.59	143	2500	0.0572	0.943
503	-2477.85	30.5294	19.6605	0.00353221	-2914.3	112	2500	0.0448	0.955	-2640.75	148	2500	0.0592	0.941
504	-2932.64	39.8647	22.5492	0.00152226	-3576.01	32	2500	0.0128	0.987	-3119.24	125	2500	0.05	0.95
505	-2768.46	35.3907	20.7703	0.00188693	-3274.48	79	2500	0.0316	0.968	-2888.13	311	2500	0.1244	0.876
506	-3108.18	37.0521	22.479	0.00154902	-3751.72	38	2500	0.0152	0.985	-3298.25	120	2500	0.048	0.952
507	-2766.21	41.6099	22.8195	0.00393139	-3420.64	17	2500	0.0068	0.993	-2930.09	156	2500	0.0624	0.938
508	-2879.56	35.5329	24.8201	0.00181175	-3437.1	71	2500	0.0284	0.972	-3035.02	161	2500	0.0644	0.936
509	-2730.8	41.7854	19.1566	0.00324831	-3115.51	128	2500	0.0512	0.949	-2836.39	399	2500	0.1596	0.84
510	-2943.91	36.0225	24.8316	0.00173004	-3547.77	50	2500	0.02	0.98	-3125.28	118	2500	0.0472	0.953
511	-2576.76	35.1908	20.3029	0.00490254	-3144.84	30	2500	0.012	0.988	-2743.69	117	2500	0.0468	0.953
512	-2862.64	44.7969	16.2314	0.00107889	-3429.38	31	2500	0.0124	0.988	-3103.09	52	2500	0.0208	0.979
513	-2671.98	38.8634	17.9292	0.00230173	-3123.19	80	2500	0.032	0.968	-2874.08	87	2500	0.0348	0.965
514	-2394.38	29.5718	25.1394	0.00246617	-2970.63	36	2500	0.0144	0.986	-2561.78	95	2500	0.038	0.962
515	-2612.29	32.2937	19.7665	0.00278679	-3093.63	82	2500	0.0328	0.967	-2795.29	110	2500	0.044	0.956
516	-2420.13	28.8899	24.2538	0.00288707	-2986.02	38	2500	0.0152	0.985	-2548.8	202	2500	0.0808	0.919
517	-2824.1	37.5641	19.6145	0.00325654	-3303.86	91	2500	0.0364	0.964	-2980.06	194	2500	0.0776	0.922
518	-2637.59	34.5121	20.5876	0.00347612	-3108.64	100	2500	0.04	0.96	-2818.84	108	2500	0.0432	0.957
519	-3036.85	43.2962	21.402	0.00164896	-3818.41	12	2500	0.0048	0.995	-3264.98	68	2500	0.0272	0.973
520	-2722.55	36.8532	18.5675	0.00139264	-3343.53	45	2500	0.018	0.982	-2878.27	201	2500	0.0804	0.92
521	-3226.4	39.7794	21.8269	0.00192885	-3655.7	140	2500	0.056	0.944	-3421.64	125	2500	0.05	0.95
522	-2856.33	34.7013	32.3917	0.00353741	-3657.77	8	2500	0.0032	0.997	-3015.3	170	2500	0.068	0.932
523	-2474.83	33.4365	22.2039	0.00274054	-2986.34	52	2500	0.0208	0.979	-2624.5	195	2500	0.078	0.922
524	-2815.83	37.715	19.0016	0.00163106	-3309.79	70	2500	0.028	0.972	-2938.47	338	2500	0.1352	0.865
525	-2463.3	31.4387	24.2665	0.00267657	-2975.8	76	2500	0.0304	0.97	-2587.93	231	2500	0.0924	0.908
526	-3300.55	47.6257	24.8098	0.00171794	-4035.58	17	2500	0.0068	0.993	-3457.08	261	2500	0.1044	0.896
527	-2524	30.8534	30.287	0.00309774	-3005.6	97	2500	0.0388	0.961	-2580.63	690	2500	0.276	0.724
528	-2515.9	28.5526	24.1182	0.00627325	-2939.41	160	2500	0.064	0.936	-2639.26	268	2500	0.1072	0.893
529	-2528.47	32.3574	20.1169	0.00151778	-2939.13	142	2500	0.0568	0.943	-2659.78	234	2500	0.0936	0.906
530	-3114.32	37.2113	27.8128	0.0029627	-3778.61	47	2500	0.0188	0.981	-3297.14	134	2500	0.0536	0.946
531	-2615.94	28.0502	33.1385	0.00672298	-3228.96	60	2500	0.024	0.976	-2725.41	343	2500	0.1372	0.863
532	-2862.52	36.4037	31.5373	0.00412008	-3616.2	14	2500	0.0056	0.994	-3061.96	101	2500	0.0404	0.96
533	-2702.04	34.3125	22.8024	0.00338948	-3282.56	42	2500	0.0168	0.983	-2885.75	113	2500	0.0452	0.955
534	-2596.01	38.8153	22.8888	0.00327232	-3239.85	18	2500	0.0072	0.993	-2777.26	113	2500	0.0452	0.955
535	-2909.24	34.5125	22.0758	0.0016989	-3340.68	186	2500	0.0744	0.926	-3046.63	270	2500	0.108	0.892
536	-2421.17	32.7475	20.5905	0.00268684	-2886.41	62	2500	0.0248	0.975	-2571.59	138	2500	0.0552	0.945
537	-2810.89	32.737	27.6864	0.00253996	-3330.12	86	2500	0.0344	0.966	-2955.77	203	2500	0.0812	0.919
538	-2753.27	33.4488	21.3815	0.00239763	-3272.1	88	2500	0.0352	0.965	-2974.19	42	2500	0.0168	0.983
539	-2930.77	34.7064	24.0727	0.00118719	-3596.28	35	2500	0.014	0.986	-3127.71	120	2500	0.048	0.952
540	-2360.18	34.8496	17.9914	0.00416629	-2680.12	190	2500	0.076	0.924	-2484.25	275	2500	0.11	0.89
541	-2748.48	27.9469	27.3023	0.00340747	-3101.37	264	2500	0.1056	0.894	-2925.52	110	2500	0.044	0.956
542	-2709.03	33.3518	19.2131	0.00159225	-3188.51	94	2500	0.0376	0.962	-2927.62	45	2500	0.018	0.982
543	-2928.51	31.4539	32.7392	0.00171688	-3534.25	61	2500	0.0244	0.976	-3092.06	143	2500	0.0572	0.943
544	-2577.51	34.0185	21.8379	0.00279959	-3031.12	119	2500	0.0476	0.952	-2691.37	334	2500	0.1336	0.866
545	-3051.44	41.1828	30.6036	0.00271091	-4105.39	0	2500	0	1	-3284.04	66	2500	0.0264	0.974
546	-2400.34	31.1861	17.1483	0.0020535	-2745.39	206	2500	0.0824	0.918	-2586.6	80	2500	0.032	0.968
547	-2570.94	32.5948	41.4708	0.00649369	-3394.11	5	2500	0.002	0.998	-2696.17	273	2500	0.1092	0.891
548	-2525.13	35.1711	17.6455	0.00221656	-2893.48	177	2500	0.0708	0.929	-2641.03	341	2500	0.1364	0.864
549	-2907.54	35.1117	21.2599	0.00184509	-3435.92	81	2500	0.0324	0.968	-3091.44	126	2500	0.0504	0.95
550	-2522.36	29.4913	29.8824	0.00316309	-3180.06	33	2500	0.0132	0.987	-2680.94	157	2500	0.0628	0.937
551	-2479.14	30.5092	29.5652	0.00442463	-3060.11	42	2500	0.0168	0.983	-2613.31	240	2500	0.096	0.904
552	-2898.06	30.1988	27.3618	0.00290657	-3461.74	70	2500	0.028	0.972	-3066.15	143	2500	0.0572	0.943
553	-2368.5	33.3907	18.2597	0.00262366	-2807.83	71	2500	0.0284	0.972	-2538.88	92	2500	0.0368	0.963
554	-2857.08	38.8594	26.6987	0.00252866	-3680.82	5	2500	0.002	0.998	-3063.99	88	2500	0.0352	0.965
555	-2739.99	36.4894	19.6098	0.00140475	-3243.84	63	2500	0.0252	0.975	-2889.53	210	2500	0.084	0.916
556	-2904.03	41.5491	23.7084	0.00215694	-3591.76	16	2500	0.0064	0.994	-3096.98	121	2500	0.0484	0.952
557	-2869.48	35.9705	32.3457	0.00375051	-3752.25	4	2500	0.0016	0.998	-3028.04	199	2500	0.0796	0.92
558	-2993.26	39.7099	19.4701	0.00101613	-3557.47	64	2500	0.0256	0.974	-3164.49	208	2500	0.0832	0.917
559	-2785.8	32.555	25.6294	0.00218695	-3307.37	84	2500	0.0336	0.966	-2939.08	186	2500	0.0744	0.926
560	-2574.88	32.9169	26.8618	0.00209288	-3200.05	38	2500	0.0152	0.985	-2707.68	239	2500	0.0956	0.904
561	-2277.48	30.4857	21.3533	0.00302597	-2724.38	93	2500	0.0372	0.963	-2435.02	136	2500	0.0544	0.946
562	-2723.47	44.4815	24.2433	0.00350097	-3509.6	2	2500	0.0008	0.999	-2881.38	225	2500	0.09	0.91
563	-2763.38	40.7531	28.0828	0.00516429	-3447.74	8	2500	0.0032	0.997	-2873.45	375	2500	0.15	0.85
564	-2636.15	33.1083	19.7319	0.00242903	-3062.92	115	2500	0.046	0.954	-2804.77	117	2500	0.0468	0.953
565	-3015.96	41.2234	21.799	0.000992383	-3730.26	18	2500	0.0072	0.993	-3221.85	102	2500	0.0408	0.959
566	-2920.16	34.8277	24.873	0.00199317	-3621.49	29	2500	0.0116	0.988	-3103.48	133	2500	0.0532	0.947
567	-2657.33	36.2618	23.8172	0.00233415	-3180.79	56	2500	0.0224	0.978	-2795.83	238	2500	0.0952	0.905
568	-2829.2	38.9842	19.9632	0.00285517	-3535.72	17	2500	0.0068	0.993	-3055.73	55	2500	0.022	0.978
569	-2554.48	32.5267	21.1506	0.00441982	-3048.23	75	2500	0.03	0.97	-2688.23	256	2500	0.1024	0.898
570	-2775.06	41.5483	20.8258	0.00341368	-3359.77	24	2500	0.0096	0.99	-2968.94	97	2500	0.0388	0.961
571	-2841.25	37.3023	22.9549	0.00251759	-3533.99	21	2500	0.0084	0.992	-3053.69	83	2500	0.0332	0.967
572	-2643.95	33.4841	20.1125	0.00206704	-3113.19	101	2500	0.0404	0.96	-2810.24	121	2500	0.0484	0.952
573	-2675.63	32.0686	22.1878	0.00262194	-3154.45	107	2500	0.0428	0.957	-2828.71	194	2500	0.0776	0.922
574	-2904.11	47.5456	19.0526	0.00176177	-3491.44	27	2500	0.0108	0.989	-3044.44	280	2500	0.112	0.888
575	-2888.37	32.6788	24.3855	0.00262968	-3368.76	127	2500	0.0508	0.949	-3021.79	254	2500	0.1016	0.898
576	-2208.15	32.7401	16.7844	0.00855131	-2562.84	122	2500	0.0488	0.951	-2313.33	342	2500	0.1368	0.863
577	-2653.42	42.4454	19.5513	0.00192856	-3203.32	29	2500	0.0116	0.988	-2823.71	152	2500	0.0608	0.939
578	-3149.59	44.3713	21.1823	0.00107556	-4020.33	4	2500	0.0016	0.998	-3383.13	83	2500	0.0332	0.967
579	-3045.64	39.2281	27.1677	0.00275209	-3696.22	31	2500	0.0124	0.988	-3190.16	278	2500	0.1112	0.889
580	-3048.38	31.7703	25.8881	0.00202483	-3549.03	121	2500	0.0484	0.952	-3240.88	119	2500	0.0476	0.952
581	-2558.08	36.3044	22.9298	0.00456468	-3120.31	27	2500	0.0108	0.989	-2689.96	232	2500	0.0928	0.907
582	-2653.04	37.3237	24.7607	0.003227	-3186.9	48	2500	0.0192	0.981	-2788.95	263	2500	0.1052	0.895
583	-2689.97	40.7009	18.4445	0.00189156	-3246	41	2500	0.0164	0.984	-2819.81	282	2500	0.1128	0.887
584	-2919.23	35.1493	24.0683	0.00173538	-3596.06	36	2500	0.0144	0.986	-3105.25	114	2500	0.0456	0.954
585	-2841.03	37.2485	25.4962	0.00328764	-3588.39	13	2500	0.0052	0.995	-3017.13	146	2500	0.0584	0.942
586	-2953.34	43.6231	17.8336	0.00298879	-3552.84	28	2500	0.0112	0.989	-3170.32	80	2500	0.032	0.968
587	-2971.16	44.2012	23.8644	0.00321152	-3729.03	3	2500	0.0012	0.999	-3180.29	95	2500	0.038	0.962
588	-2700.94	33.0523	22.7686	0.00270563	-3181.32	77	2500	0.0308	0.969	-2887.4	92	2500	0.0368	0.963
589	-2540.85	33.6221	22.4257	0.00244115	-3132.81	22	2500	0.0088	0.991	-2696.14	164	2500	0.0656	0.934
590	-3144.58	47.0822	20.0398	0.00128691	-3727.79	45	2500	0.018	0.982	-3336.59	150	2500	0.06	0.94
591	-2969.33	36.9846	26.6102	0.00247523	-3667.84	17	2500	0.0068	0.993	-3137.7	165	2500	0.066	0.934
592	-2547.48	35.8035	16.0653	0.00420792	-2891.98	187	2500	0.0748	0.925	-2664.16	334	2500	0.1336	0.866
593	-2868.53	42.4549	18.45	0.0023576	-3406.87	44	2500	0.0176	0.982	-3046.1	162	2500	0.0648	0.935
594	-2758.26	29.5728	31.1138	0.00482257	-3326.59	67	2500	0.0268	0.973	-2893.99	245	2500	0.098	0.902
595	-2569.08	30.7313	24.2167	0.00305965	-3112.07	71	2500	0.0284	0.972	-2719.79	190	2500	0.076	0.924
596	-3430.97	44.3322	24.1934	0.00128992	-4161.8	23	2500	0.0092	0.991	-3617.33	178	2500	0.0712	0.929
597	-2823.86	34.0526	26.7204	0.00175189	-3460.01	33	2500	0.0132	0.987	-2946.21	349	2500	0.1396	0.86
598	-2807.68	34.3767	23.3222	0.00234737	-3344.8	66	2500	0.0264	0.974	-2965.61	188	2500	0.0752	0.925
599	-2805.18	37.2844	21.1911	0.00180281	-3428.17	30	2500	0.012	0.988	-2949.05	264	2500	0.1056	0.894
600	-2658.59	34.7529	19.125	0.0020204	-3182.74	61	2500	0.0244	0.976	-2832.52	135	2500	0.054	0.946
601	-2962.52	41.7021	16.722	0.00129871	-3505.01	66	2500	0.0264	0.974	-3144.6	163	2500	0.0652	0.935
602	-3290.56	40.1446	30.8598	0.00221621	-4169.16	6	2500	0.0024	0.998	-3474.68	165	2500	0.066	0.934
603	-2619.33	34.3507	20.6291	0.00205426	-3042.8	133	2500	0.0532	0.947	-2818.84	80	2500	0.032	0.968
604	-3213.24	49.4401	22.3312	0.00204961	-3887.73	20	2500	0.008	0.992	-3393.62	201	2500	0.0804	0.92
605	-2348.75	32.9554	20.7293	0.00445402	-2857.15	52	2500	0.0208	0.979	-2492.3	161	2500	0.0644	0.936
606	-2847.57	35.9874	16.6931	0.00137019	-3399.42	45	2500	0.018	0.982	-3078.28	54	2500	0.0216	0.978
607	-2699.82	41.195	18.217	0.00146009	-3351.64	19	2500	0.0076	0.992	-2891.93	97	2500	0.0388	0.961
608	-2884.48	35.7508	24.8542	0.00228264	-3422.91	77	2500	0.0308	0.969	-3043.73	200	2500	0.08	0.92
609	-2735.54	32.1707	24.0156	0.00300533	-3211.53	94	2500	0.0376	0.962	-2894.17	136	2500	0.0544	0.946
610	-2625.55	41.7709	17.6633	0.00210057	-3204.3	17	2500	0.0068	0.993	-2807.13	127	2500	0.0508	0.949
611	-2688.04	32.9599	22.365	0.00232606	-3161.18	102	2500	0.0408	0.959	-2844.02	147	2500	0.0588	0.941
612	-2550.19	28.2838	27.3277	0.00339798	-3018.31	113	2500	0.0452	0.955	-2664.49	304	2500	0.1216	0.878
613	-2553.8	35.2378	21.1489	0.00197791	-3150.07	32	2500	0.0128	0.987	-2770.93	41	2500	0.0164	0.984
614	-2765.06	32.8966	35.1981	0.00334919	-3492.87	16	2500	0.0064	0.994	-2932.87	149	2500	0.0596	0.94
615	-3245.07	33.8269	34.7821	0.00171863	-4118.1	12	2500	0.0048	0.995	-3396.86	241	2500	0.0964	0.904
616	-2882.53	40.9676	19.7729	0.00173475	-3415.65	70	2500	0.028	0.972	-3045.82	193	2500	0.0772	0.923
617	-2910.56	43.5281	20.6588	0.00157364	-3447.79	44	2500	0.0176	0.982	-3052.02	284	2500	0.1136	0.886
618	-2597.91	37.1271	24.8787	0.00406048	-3314.73	11	2500	0.0044	0.996	-2757.98	173	2500	0.0692	0.931
619	-2691.72	30.3281	31.3065	0.00249809	-3157.2	108	2500	0.0432	0.957	-2769.15	544	2500	0.2176	0.782
620	-2375.68	26.4243	25.0532	0.00245704	-2909.78	56	2500	0.0224	0.978	-2548.11	102	2500	0.0408	0.959
621	-2604.43	38.5685	21.3147	0.00438107	-3085.03	70	2500	0.028	0.972	-2742.66	237	2500	0.0948	0.905
622	-3310.47	40.9148	26.1903	0.00107196	-4230.23	4	2500	0.0016	0.998	-3515.03	133	2500	0.0532	0.947
623	-2809.75	34.1971	22.9038	0.00194396	-3429.87	50	2500	0.02	0.98	-3030.36	55	2500	0.022	0.978
624	-3078.12	38.103	24.3142	0.00199132	-3699.73	35	2500	0.014	0.986	-3225.86	235	2500	0.094	0.906
625	-2957.61	40.0865	27.2232	0.00323634	-3744.56	10	2500	0.004	0.996	-3106.51	229	2500	0.0916	0.908
626	-3101.56	39.2289	24.4526	0.00140643	-3751.74	37	2500	0.0148	0.985	-3285.61	129	2500	0.0516	0.948
627	-2950.68	40.6571	22.6746	0.00205869	-3604.23	19	2500	0.0076	0.992	-3141.42	139	2500	0.0556	0.944
628	-2894.72	40.3508	19.0756	0.00199534	-3502.79	28	2500	0.0112	0.989	-3082.45	111	2500	0.0444	0.956
629	-2896.38	40.3127	24.8232	0.003086	-3636.16	17	2500	0.0068	0.993	-3102.02	82	2500	0.0328	0.967
630	-2600.63	34.0163	20.7489	0.00379982	-3063.5	77	2500	0.0308	0.969	-2747.98	189	2500	0.0756	0.924
631	-2775.22	29.7704	21.7096	0.00134859	-3337.35	75	2500	0.03	0.97	-2975.7	90	2500	0.036	0.964
632	-2481.39	27.7423	24.8489	0.00336834	-3013.48	87	2500	0.0348	0.965	-2632.76	162	2500	0.0648	0.935
633	-3256.55	37.8607	27.1952	0.00210644	-3905.88	52	2500	0.0208	0.979	-3420.76	189	2500	0.0756	0.924
634	-2848.6	34.9542	22.5677	0.00371664	-3436.08	64	2500	0.0256	0.974	-2983.23	269	2500	0.1076	0.892
635	-2798.63	37.5296	17.7654	0.00141693	-3315.37	66	2500	0.0264	0.974	-2962.83	205	2500	0.082	0.918
636	-2696.34	33.1395	21.3752	0.00227632	-3240.56	59	2500	0.0236	0.976	-2844.86	223	2500	0.0892	0.911
637	-2793.88	35.3002	28.156	0.00268104	-3538.22	13	2500	0.0052	0.995	-2986.88	111	2500	0.0444	0.956
638	-2713.58	40.0915	20.0388	0.00171744	-3331.79	21	2500	0.0084	0.992	-2921.95	76	2500	0.0304	0.97
639	-3002.22	46.1553	22.3589	0.00185724	-3723.32	7	2500	0.0028	0.997	-3216.45	98	2500	0.0392	0.961
640	-2747.24	38.992	18.8189	0.0016466	-3344.51	34	2500	0.0136	0.986	-2990.64	34	2500	0.0136	0.986
641	-2902.53	37.293	25.6158	0.00205954	-3663.48	15	2500	0.006	0.994	-3082.38	153	2500	0.0612	0.939
642	-3050.38	38.5306	20.7496	0.00123759	-3599.12	80	2500	0.032	0.968	-3278.16	69	2500	0.0276	0.972
643	-2885.4	30.0416	34.3572	0.00235478	-3394.26	127	2500	0.0508	0.949	-3018.07	300	2500	0.12	0.88
644	-2548.63	35.8909	18.5451	0.00213111	-2983.23	106	2500	0.0424	0.958	-2701.01	155	2500	0.062	0.938
645	-2932.54	37.8651	34.1886	0.00220051	-3794.8	5	2500	0.002	0.998	-3071.31	298	2500	0.1192	0.881
646	-2407.4	31.6108	21.8783	0.00276814	-2948.59	51	2500	0.0204	0.98	-2522.12	353	2500	0.1412	0.859
647	-2296.56	31.3004	16.5601	0.00310349	-2536.18	338	2500	0.1352	0.865	-2397.95	411	2500	0.1644	0.836
648	-2565.76	30.8696	23.9243	0.00288131	-3025.38	113	2500	0.0452	0.955	-2703.73	205	2500	0.082	0.918
649	-2668.54	38.5258	18.0056	0.00167445	-3391.12	13	2500	0.0052	0.995	-2874.44	89	2500	0.0356	0.964
650	-2547.7	36.7713	17.6111	0.00236144	-3013.04	62	2500	0.0248	0.975	-2729.69	104	2500	0.0416	0.958
651	-2431.69	33.9662	24.6216	0.00348936	-3085.17	8	2500	0.0032	0.997	-2563.39	195	2500	0.078	0.922
652	-2648.43	33.7373	29.5493	0.0039657	-3215.01	44	2500	0.0176	0.982	-2809.28	152	2500	0.0608	0.939
653	-2560.96	37.692	18.7195	0.00241519	-3108.11	39	2500	0.0156	0.984	-2761.59	76	2500	0.0304	0.97
654	-2191.2	30.4335	16.3541	0.00254248	-2509.85	193	2500	0.0772	0.923	-2291.97	379	2500	0.1516	0.848
655	-3281.98	43.9782	25.0115	0.00112562	-4254.52	3	2500	0.0012	0.999	-3481.27	128	2500	0.0512	0.949
656	-2903.39	54.9168	18.7064	0.00216541	-3566.82	8	2500	0.0032	0.997	-3062.62	257	2500	0.1028	0.897
657	-2724.96	29.8258	26.2781	0.00149758	-3336.52	58	2500	0.0232	0.977	-2859.43	260	2500	0.104	0.896
658	-2813.1	32.4612	27.1945	0.00270452	-3321.36	113	2500	0.0452	0.955	-2945.02	266	2500	0.1064	0.894
659	-2704.39	31.0311	27.5926	0.00377838	-3215.34	91	2500	0.0364	0.964	-2846.94	182	2500	0.0728	0.927
660	-2696.34	40.5346	15.0039	0.00101502	-3149.58	80	2500	0.032	0.968	-2876.8	130	2500	0.052	0.948
661	-2495.73	28.3613	23.8809	0.00223515	-3038.51	74	2500	0.0296	0.97	-2674.54	88	2500	0.0352	0.965
662	-3160.22	37.1738	33.0847	0.00296191	-4063.28	6	2500	0.0024	0.998	-3364.41	111	2500	0.0444	0.956
663	-2811.75	36.8001	23.2546	0.00266256	-3468.71	40	2500	0.016	0.984	-3004.39	111	2500	0.0444	0.956
664	-2515.57	36.4605	21.0139	0.00164667	-3092.62	37	2500	0.0148	0.985	-2670.81	170	2500	0.068	0.932
665	-2722.31	35.3506	22.2123	0.00405161	-3155.37	131	2500	0.0524	0.948	-2878.79	176	2500	0.0704	0.93
666	-2829.3	36.0674	21.1239	0.00308597	-3299.64	102	2500	0.0408	0.959	-2995.75	152	2500	0.0608	0.939
667	-3077.41	42.1159	31.5642	0.00443376	-3929.17	7	2500	0.0028	0.997	-3217.02	272	2500	0.1088	0.891
668	-2362.1	30.2026	22.8162	0.00379504	-2840.75	75	2500	0.03	0.97	-2500.42	186	2500	0.0744	0.926
669	-2739.5	35.4083	22.489	0.00283842	-3350.47	25	2500	0.01	0.99	-2925.64	113	2500	0.0452	0.955
670	-2602.89	28.0826	22.0535	0.0021243	-3129.86	86	2500	0.0344	0.966	-2794.99	79	2500	0.0316	0.968
671	-2911.65	33.3761	24.2469	0.00128035	-3437.44	100	2500	0.04	0.96	-3088.05	143	2500	0.0572	0.943
672	-3083.32	31.4608	31.4013	0.00170222	-3673.74	88	2500	0.0352	0.965	-3284.98	80	2500	0.032	0.968
673	-2194.7	30.2052	22.151	0.00545067	-2740.38	40	2500	0.016	0.984	-2352.32	114	2500	0.0456	0.954
674	-2582.9	37.6434	17.437	0.0016875	-3281.11	9	2500	0.0036	0.996	-2847.26	23	2500	0.0092	0.991
675	-2913.3	33.3305	23.1492	0.0026146	-3312.14	199	2500	0.0796	0.92	-3074.2	158	2500	0.0632	0.937
676	-2996.72	36.2495	31.8853	0.00473224	-3778.65	12	2500	0.0048	0.995	-3154.5	195	2500	0.078	0.922
677	-2653.08	34.1573	24.3915	0.00170771	-3348.91	16	2500	0.0064	0.994	-2885.51	36	2500	0.0144	0.986
678	-2816.45	33.2092	26.1623	0.00122744	-3579.3	12	2500	0.0048	0.995	-3007.48	111	2500	0.0444	0.956
679	-2665.65	30.3037	24.7418	0.00261279	-3161.09	100	2500	0.04	0.96	-2811.93	193	2500	0.0772	0.923
680	-2849.91	32.8896	26.6285	0.002127	-3422.75	56	2500	0.0224	0.978	-2974.66	329	2500	0.1316	0.868
681	-2900.35	37.2719	22.3211	0.00122149	-3549.95	31	2500	0.0124	0.988	-3089.35	129	2500	0.0516	0.948
682	-2584.04	32.7911	25.3624	0.00224026	-3231.69	38	2500	0.0152	0.985	-2745.1	169	2500	0.0676	0.932
683	-2749.6	31.5642	25.4523	0.00075839	-3210.81	148	2500	0.0592	0.941	-2877.4	283	2500	0.1132	0.887
684	-2766.95	33.1649	27.9127	0.0024753	-3398.16	39	2500	0.0156	0.984	-2864.52	473	2500	0.1892	0.811
685	-2931.63	36.476	19.7631	0.00149248	-3417.48	115	2500	0.046	0.954	-3111.11	139	2500	0.0556	0.944
686	-3036.89	46.6482	18.2951	0.00114528	-3824.38	3	2500	0.0012	0.999	-3299.06	41	2500	0.0164	0.984
687	-2848.02	40.2403	22.4143	0.00199632	-3491.49	23	2500	0.0092	0.991	-3032.88	127	2500	0.0508	0.949
688	-2535.75	33.1167	18.8518	0.00195122	-2980.64	94	2500	0.0376	0.962	-2712.14	112	2500	0.0448	0.955
689	-2792.2	50.255	23.4497	0.00321274	-3673.75	1	2500	0.0004	1	-3022.36	54	2500	0.0216	0.978
690	-2718.16	39.7501	17.8455	0.001707	-3300.03	40	2500	0.016	0.984	-2892.28	132	2500	0.0528	0.947
691	-2506.35	33.4327	15.4404	0.00107552	-2995.55	80	2500	0.032	0.968	-2738.99	36	2500	0.0144	0.986
692	-2858.27	35.3919	23.7042	0.00233419	-3513.02	30	2500	0.012	0.988	-3001.63	256	2500	0.1024	0.898
693	-2234.68	30.4722	20.5529	0.00331513	-2811.27	32	2500	0.0128	0.987	-2426.22	66	2500	0.0264	0.974
694	-2587.56	31.3281	21.1806	0.0031074	-3050.62	113	2500	0.0452	0.955	-2761.62	108	2500	0.0432	0.957
695	-2340.3	30.9824	20.8867	0.00385108	-2961.14	24	2500	0.0096	0.99	-2529.2	58	2500	0.0232	0.977
696	-2492.65	32.0932	23.5581	0.00385389	-3063.25	40	2500	0.016	0.984	-2627.41	206	2500	0.0824	0.918
697	-2730.2	40.8478	21.1938	0.00502042	-3277.28	50	2500	0.02	0.98	-2852.24	334	2500	0.1336	0.866
698	-2434.15	35.9165	17.7134	0.00167025	-3085.88	14	2500	0.0056	0.994	-2619.24	119	2500	0.0476	0.952
699	-2825.98	36.2588	25.2489	0.00239511	-3520.18	17	2500	0.0068	0.993	-2999	149	2500	0.0596	0.94
700	-2355.64	24.4377	30.0653	0.00668809	-2727.83	209	2500	0.0836	0.916	-2413.29	627	2500	0.2508	0.749
701	-2887.57	32.336	28.0366	0.00190628	-3550.81	45	2500	0.018	0.982	-3088.53	90	2500	0.036	0.964
702	-2582.07	35.946	18.7425	0.00562755	-3115.46	57	2500	0.0228	0.977	-2750.38	168	2500	0.0672	0.933
703	-2666.91	36.282	23.85	0.00406631	-3272.89	34	2500	0.0136	0.986	-2835.42	139	2500	0.0556	0.944
704	-2851.55	38.8421	19.1905	0.0024815	-3515.2	22	2500	0.0088	0.991	-3060.32	75	2500	0.03	0.97
705	-2695.46	32.8181	22.9521	0.00208779	-3159.96	119	2500	0.0476	0.952	-2829.44	272	2500	0.1088	0.891
706	-2608.1	31.7766	23.8237	0.00242107	-3067.88	102	2500	0.0408	0.959	-2755.72	159	2500	0.0636	0.936
707	-2644.96	33.0811	27.1818	0.00153642	-3335.35	17	2500	0.0068	0.993	-2834.15	90	2500	0.036	0.964
708	-2840.22	40.3739	20.4143	0.00134833	-3487.61	26	2500	0.0104	0.99	-3036.76	85	2500	0.034	0.966
709	-3440.7	45.1486	26.5684	0.00206733	-4248.21	10	2500	0.004	0.996	-3652.88	86	2500	0.0344	0.966
710	-2700.45	33.211	22.7706	0.00382585	-3211.53	86	2500	0.0344	0.966	-2902.8	57	2500	0.0228	0.977
711	-2796.58	36.297	19.1342	0.00164206	-3258.42	98	2500	0.0392	0.961	-2961.27	167	2500	0.0668	0.933
712	-2574.13	37.7453	16.2479	0.00658944	-2979.05	130	2500	0.052	0.948	-2716.64	239	2500	0.0956	0.904
713	-3087.71	37.8759	21.9842	0.00117541	-3761.06	23	2500	0.0092	0.991	-3337.48	38	2500	0.0152	0.985
714	-2826.47	36.744	23.5511	0.00252388	-3446.24	35	2500	0.014	0.986	-3000.38	141	2500	0.0564	0.944
715	-2573.15	35.6119	19.5861	0.00376066	-3082.25	74	2500	0.0296	0.97	-2767.9	79	2500	0.0316	0.968
716	-2934.95	46.0065	19.116	0.00214658	-3495.56	30	2500	0.012	0.988	-3159.91	80	2500	0.032	0.968
717	-2698.38	31.4824	26.4371	0.00436284	-3080.38	174	2500	0.0696	0.93	-2838.17	228	2500	0.0912	0.909
718	-2797.47	40.1527	18.8203	0.00325551	-3269.48	74	2500	0.0296	0.97	-3011.49	61	2500	0.0244	0.976
719	-2834.42	41.1991	17.1932	0.00103763	-3272.63	100	2500	0.04	0.96	-2965.66	317	2500	0.1268	0.873
720	-2469.94	28.8852	21.3843	0.00285458	-2822.46	195	2500	0.078	0.922	-2632.26	102	2500	0.0408	0.959
721	-3281.32	43.9615	25.7177	0.00208355	-4095.92	6	2500	0.0024	0.998	-3494.02	84	2500	0.0336	0.966
722	-2948.23	39.5835	16.781	0.000777843	-3548.54	34	2500	0.0136	0.986	-3116.27	210	2500	0.084	0.916
723	-2672.91	44.4246	18.3925	0.00239895	-3278.92	8	2500	0.0032	0.997	-2842.74	178	2500	0.0712	0.929
724	-2550.46	31.458	18.5173	0.00190654	-2897.48	207	2500	0.0828	0.917	-2710	146	2500	0.0584	0.942
725	-2484.26	27.3191	27.5572	0.00333344	-3154.76	35	2500	0.014	0.986	-2652.15	111	2500	0.0444	0.956
726	-2253.46	26.1437	20.5478	0.0050257	-2632.03	194	2500	0.0776	0.922	-2415.23	94	2500	0.0376	0.962
727	-2898.26	37.6651	28.1862	0.00325447	-3638.07	9	2500	0.0036	0.996	-3035.01	280	2500	0.112	0.888
728	-2753.6	34.3544	24.587	0.00242998	-3447.15	24	2500	0.0096	0.99	-2944.06	100	2500	0.04	0.96
729	-2724.06	30.842	25.4283	0.00123401	-3347.95	43	2500	0.0172	0.983	-2863.37	225	2500	0.09	0.91
730	-2703.21	36.9077	20.375	0.00246204	-3261.6	36	2500	0.0144	0.986	-2852.5	208	2500	0.0832	0.917
731	-3069.03	32.0252	31.7719	0.0018714	-3869.69	24	2500	0.0096	0.99	-3262	114	2500	0.0456	0.954
732	-2880.61	34.4035	26.3584	0.00257121	-3481.48	58	2500	0.0232	0.977	-3035.05	173	2500	0.0692	0.931
733	-2420.2	26.0792	28.1878	0.00530484	-2807.64	193	2500	0.0772	0.923	-2501.42	489	2500	0.1956	0.804
734	-2646.03	36.0775	17.0437	0.0014914	-3130.05	69	2500	0.0276	0.972	-2830.06	97	2500	0.0388	0.961
735	-2524.48	35.8938	14.4891	0.000984513	-2942.78	108	2500	0.0432	0.957	-2719.23	86	2500	0.0344	0.966
736	-2978.67	34.8063	30.0102	0.00206236	-3672.08	33	2500	0.0132	0.987	-3138.42	225	2500	0.09	0.91
737	-3146.93	36.4933	18.6985	0.000382415	-3683.67	94	2500	0.0376	0.962	-3368.42	69	2500	0.0276	0.972
738	-2644.56	31.5495	27.9239	0.00262046	-3177.76	73	2500	0.0292	0.971	-2798.79	154	2500	0.0616	0.938
739	-2573.31	30.5997	28.4654	0.00273509	-3237.28	27	2500	0.0108	0.989	-2740.99	131	2500	0.0524	0.948
740	-2771.34	42.018	17.8677	0.00142317	-3196.02	102	2500	0.0408	0.959	-2914.11	274	2500	0.1096	0.89
741	-2780.06	36.3819	25.2299	0.00396621	-3422.45	23	2500	0.0092	0.991	-2940.21	182	2500	0.0728	0.927
742	-2780.74	33.7313	22.5689	0.00150383	-3317.96	74	2500	0.0296	0.97	-2929.32	196	2500	0.0784	0.922
743	-2954.5	45.4133	22.1391	0.00136141	-3851.77	3	2500	0.0012	0.999	-3163.32	86	2500	0.0344	0.966
744	-2330.32	28.1379	18.119	0.00264442	-2695.83	178	2500	0.0712	0.929	-2476.08	175	2500	0.07	0.93
745	-3213.34	40.0382	24.2557	0.00120995	-3998.08	12	2500	0.0048	0.995	-3377.94	210	2500	0.084	0.916
746	-2847.52	34.1573	25.9178	0.00229786	-3513.95	39	2500	0.0156	0.984	-3073.67	40	2500	0.016	0.984
747	-2840.84	36.802	23.9853	0.00324615	-3392.77	52	2500	0.0208	0.979	-3003.43	178	2500	0.0712	0.929
748	-2643.09	31.7142	24.4645	0.0040006	-3169.4	64	2500	0.0256	0.974	-2738.92	404	2500	0.1616	0.838
749	-2963.49	38.5443	22.3266	0.00174506	-3601.05	32	2500	0.0128	0.987	-3181.39	78	2500	0.0312	0.969
750	-2640.04	32.9884	29.1642	0.00255343	-3420.13	13	2500	0.0052	0.995	-2802.68	165	2500	0.066	0.934
751	-2507.49	36.6478	17.1817	0.00176107	-2960.98	80	2500	0.032	0.968	-2653.85	218	2500	0.0872	0.913
752	-2642.95	36.0167	17.4765	0.00163899	-3148.23	60	2500	0.024	0.976	-2834.6	103	2500	0.0412	0.959
753	-2664.41	28.9766	27.6728	0.00465937	-3177.62	120	2500	0.048	0.952	-2807.79	186	2500	0.0744	0.926
754	-2693.99	32.4436	29.6114	0.0099838	-3219.15	69	2500	0.0276	0.972	-2871.07	92	2500	0.0368	0.963
755	-3924.93	47.8917	23.4588	0.00118251	-4720.26	23	2500	0.0092	0.991	-4186.16	68	2500	0.0272	0.973
756	-3019.1	33.1907	22.8329	0.00184169	-3493.9	126	2500	0.0504	0.95	-3178.79	188	2500	0.0752	0.925
757	-2492.34	36.1318	18.5303	0.00380615	-3075.01	31	2500	0.0124	0.988	-2651.97	166	2500	0.0664	0.934
758	-2810.4	36.4626	21.7919	0.00324549	-3312.9	75	2500	0.03	0.97	-2960.24	208	2500	0.0832	0.917
759	-2667.98	42.1585	16.3242	0.00259111	-3253.7	30	2500	0.012	0.988	-2886.56	87	2500	0.0348	0.965
760	-2344.63	30.0613	24.0589	0.00498138	-2776.22	105	2500	0.042	0.958	-2452	336	2500	0.1344	0.866
761	-2694.52	31.3182	34.1496	0.00467366	-3214.13	80	2500	0.032	0.968	-2795.55	371	2500	0.1484	0.852
762	-2872.9	33.0617	24.5501	0.00300722	-3413.08	91	2500	0.0364	0.964	-3055.82	114	2500	0.0456	0.954
763	-2556.88	31.7194	16.2588	0.00340109	-2789.5	454	2500	0.1816	0.818	-2661.8	376	2500	0.1504	0.85
764	-2572.35	30.8354	37.7444	0.00731565	-3344.77	17	2500	0.0068	0.993	-2743.96	110	2500	0.044	0.956
765	-2795.92	37.8459	29.3212	0.00401148	-3515.43	8	2500	0.0032	0.997	-2941.93	244	2500	0.0976	0.902
766	-2432.26	30.1529	22.6981	0.0036405	-2829.5	121	2500	0.0484	0.952	-2540.28	310	2500	0.124	0.876
767	-2668.84	37.1176	20.9524	0.00219848	-3283.07	29	2500	0.0116	0.988	-2838.92	141	2500	0.0564	0.944
768	-2901.99	30.8818	23.4935	0.00115663	-3537.53	46	2500	0.0184	0.982	-3118	69	2500	0.0276	0.972
769	-2995.46	44.0518	20.7632	0.00104653	-3763.43	7	2500	0.0028	0.997	-3160.78	182	2500	0.0728	0.927
770	-2568.13	35.3756	25.4746	0.0024995	-3196.25	15	2500	0.006	0.994	-2744.79	102	2500	0.0408	0.959
771	-2951.97	41.9337	25.8909	0.00221022	-3870.86	2	2500	0.0008	0.999	-3164.31	89	2500	0.0356	0.964
772	-2829.49	33.4053	24.0314	0.00294604	-3300.56	112	2500	0.0448	0.955	-2953.65	314	2500	0.1256	0.874
773	-2595.74	30.8147	19.0005	0.00185857	-2981.62	196	2500	0.0784	0.922	-2782.47	100	2500	0.04	0.96
774	-2341.17	27.274	24.4313	0.00211782	-2823.34	78	2500	0.0312	0.969	-2451.15	308	2500	0.1232	0.877
775	-2988.54	35.4355	26.8736	0.00170641	-3701.55	17	2500	0.0068	0.993	-3157.61	177	2500	0.0708	0.929
776	-2409.13	30.977	16.7907	0.00189003	-2826.57	143	2500	0.0572	0.943	-2590.37	87	2500	0.0348	0.965
777	-2956.44	43.5648	19.3228	0.00130357	-3654.15	10	2500	0.004	0.996	-3198.07	60	2500	0.024	0.976
778	-3221.09	40.6439	30.1396	0.00177738	-3928.85	20	2500	0.008	0.992	-3364.69	256	2500	0.1024	0.898
779	-2333.71	28.2266	25.0342	0.00586853	-2827.83	74	2500	0.0296	0.97	-2469.86	164	2500	0.0656	0.934
780	-2886.32	39.6526	16.5095	0.00185796	-3308.01	144	2500	0.0576	0.942	-3078.62	123	2500	0.0492	0.951
781	-2961.61	42.3708	26.3239	0.00400831	-3611.27	22	2500	0.0088	0.991	-3160.5	126	2500	0.0504	0.95
782	-2632.81	33.8052	22.1398	0.00272396	-3025.71	174	2500	0.0696	0.93	-2748.75	325	2500	0.13	0.87
783	-2864.47	40.7885	26.4375	0.00426476	-3642.05	7	2500	0.0028	0.997	-3085.3	53	2500	0.0212	0.979
784	-2778.05	25.8113	33.3763	0.00206961	-3254.67	172	2500	0.0688	0.931	-2911.76	221	2500	0.0884	0.912
785	-3430.08	40.5113	29.8957	0.00257361	-4113.46	44	2500	0.0176	0.982	-3600.42	169	2500	0.0676	0.932
786	-2688.42	42.9127	23.8437	0.0038223	-3384.36	8	2500	0.0032	0.997	-2865.8	149	2500	0.0596	0.94
787	-2866.54	45.5557	15.9655	0.000984554	-3453.74	30	2500	0.012	0.988	-3042.47	164	2500	0.0656	0.934
788	-2243.86	30.1352	20.2612	0.00214752	-2632.28	153	2500	0.0612	0.939	-2385.14	178	2500	0.0712	0.929
789	-2704.26	32.4278	24.3146	0.00253395	-3328.26	34	2500	0.0136	0.986	-2866.48	168	2500	0.0672	0.933
790	-2871.7	32.5304	23.0414	0.00210659	-3352.28	136	2500	0.0544	0.946	-3079.92	73	2500	0.0292	0.971
791	-2766.04	35.0389	27.5101	0.00324655	-3493.59	10	2500	0.004	0.996	-2956.68	92	2500	0.0368	0.963
792	-2581.31	40.8256	15.2997	0.00178948	-2987.08	93	2500	0.0372	0.963	-2744.33	142	2500	0.0568	0.943
793	-2787.35	39.3235	19.4066	0.00211603	-3335.38	48	2500	0.0192	0.981	-2994.04	94	2500	0.0376	0.962
794	-2865.5	37.4549	22.1246	0.00325682	-3506.51	25	2500	0.01	0.99	-3031.72	173	2500	0.0692	0.931
795	-2834.93	31.9043	25.0087	0.00168689	-3456.09	59	2500	0.0236	0.976	-3004.8	160	2500	0.064	0.936
796	-2738.16	38.3438	20.181	0.00146422	-3233.11	76	2500	0.0304	0.97	-2930.45	97	2500	0.0388	0.961
797	-2563	37.1072	15.7659	0.00138492	-2983.6	105	2500	0.042	0.958	-2736.06	148	2500	0.0592	0.941
798	-2666.68	33.8371	27.5522	0.00328941	-3268.03	32	2500	0.0128	0.987	-2815.57	195	2500	0.078	0.922
799	-2741.75	44.1841	28.2995	0.00479293	-3445.47	7	2500	0.0028	0.997	-2839.79	470	2500	0.188	0.812
800	-2299.77	28.012	26.6545	0.00311822	-2894.07	28	2500	0.0112	0.989	-2417.93	266	2500	0.1064	0.894
801	-2368.13	25.7884	27.4569	0.00811144	-2833.5	100	2500	0.04	0.96	-2522.21	119	2500	0.0476	0.952
802	-3029.26	48.8025	18.3139	0.00159432	-3691.03	21	2500	0.0084	0.992	-3216.82	150	2500	0.06	0.94
803	-2540.47	29.6228	21.9206	0.00353344	-2999.79	116	2500	0.0464	0.954	-2718.19	91	2500	0.0364	0.964
804	-2651.88	35.662	21.77	0.00357319	-3216.38	35	2500	0.014	0.986	-2847.01	75	2500	0.03	0.97
805	-2905.69	38.1963	21.6813	0.00126051	-3599.58	15	2500	0.006	0.994	-3115.41	100	2500	0.04	0.96
806	-2756.81	35.3849	23.6004	0.00277779	-3331.42	47	2500	0.0188	0.981	-2882.52	310	2500	0.124	0.876
807	-2963.74	36.1313	26.8795	0.00260165	-3613.26	46	2500	0.0184	0.982	-3149.16	115	2500	0.046	0.954
808	-2591.18	36.7628	18.2491	0.00233551	-3122.71	39	2500	0.0156	0.984	-2767.32	116	2500	0.0464	0.954
809	-2852.48	31.3292	25.3569	0.00116719	-3273.75	173	2500	0.0692	0.931	-2992.94	245	2500	0.098	0.902
810	-2841.36	30.1523	33.197	0.00178577	-3696.73	9	2500	0.0036	0.996	-3015.77	160	2500	0.064	0.936
811	-3152.45	47.3599	18.3764	0.00155981	-3868.72	6	2500	0.0024	0.998	-3375.57	92	2500	0.0368	0.963
812	-2766.13	44.1717	18.6547	0.00284473	-3278.91	51	2500	0.0204	0.98	-2887.26	319	2500	0.1276	0.872
813	-3018.6	35.0637	25.9294	0.00151121	-3874.01	6	2500	0.0024	0.998	-3232.09	99	2500	0.0396	0.96
814	-2492.38	37.0341	18.1945	0.002549	-3048.77	35	2500	0.014	0.986	-2636.21	228	2500	0.0912	0.909
815	-3322.38	45.7521	20.8678	0.0011579	-3927.68	47	2500	0.0188	0.981	-3496.39	208	2500	0.0832	0.917
816	-3082.7	41.3938	21.2332	0.00150142	-3696.62	39	2500	0.0156	0.984	-3219.16	295	2500	0.118	0.882
817	-2302.19	33.8378	16.6187	0.00349062	-2688.36	125	2500	0.05	0.95	-2451.96	142	2500	0.0568	0.943
818	-2761.67	37.5436	22.7469	0.00172925	-3452.21	21	2500	0.0084	0.992	-2996.01	39	2500	0.0156	0.984
819	-3109.67	40.971	22.2526	0.00247847	-3755.41	42	2500	0.0168	0.983	-3322.1	81	2500	0.0324	0.968
820	-2815.14	28.0396	42.8424	0.00320773	-3556.96	32	2500	0.0128	0.987	-2920.55	346	2500	0.1384	0.862
821	-2634.09	34.623	19.2911	0.00292196	-3066	133	2500	0.0532	0.947	-2757.56	321	2500	0.1284	0.872
822	-2389.55	30.1876	24.1728	0.00523927	-2880.5	79	2500	0.0316	0.968	-2516.47	219	2500	0.0876	0.912
823	-3095.9	36.0541	24.7033	0.0013345	-3680.9	76	2500	0.0304	0.97	-3312.67	86	2500	0.0344	0.966
824	-3000.53	41.032	17.7303	0.00101353	-3571.84	45	2500	0.018	0.982	-3251.51	45	2500	0.018	0.982
825	-2884.99	37.4687	23.5551	0.00232203	-3515.65	25	2500	0.01	0.99	-3025.37	274	2500	0.1096	0.89
826	-2776.2	40.1126	17.3225	0.00181357	-3468.42	15	2500	0.006	0.994	-2933.78	198	2500	0.0792	0.921
827	-2779.86	37.3768	22.1837	0.00205462	-3203.33	133	2500	0.0532	0.947	-2920.36	239	2500	0.0956	0.904
828	-2760.45	30.8283	38.7572	0.00293094	-3642.65	10	2500	0.004	0.996	-2913.73	199	2500	0.0796	0.92
829	-2416.17	35.2052	23.6573	0.00475685	-2919.95	39	2500	0.0156	0.984	-2566.88	152	2500	0.0608	0.939
830	-2673.63	29.703	28.628	0.0039364	-3215.72	74	2500	0.0296	0.97	-2814.73	201	2500	0.0804	0.92
831	-2737.27	28.2779	23.3475	0.00281012	-3138.86	219	2500	0.0876	0.912	-2924.81	84	2500	0.0336	0.966
832	-2621.67	32.3041	18.3713	0.00343032	-2932	286	2500	0.1144	0.886	-2794.8	122	2500	0.0488	0.951
833	-2544.25	31.8179	19.4897	0.00175917	-3069.72	48	2500	0.0192	0.981	-2722.53	84	2500	0.0336	0.966
834	-2603.46	29.9821	25.327	0.00215978	-3196.29	46	2500	0.0184	0.982	-2774.32	115	2500	0.046	0.954
835	-2789.82	32.8145	23.8686	0.00358193	-3360.36	79	2500	0.0316	0.968	-2960.79	143	2500	0.0572	0.943
836	-3017.72	34.3425	25.0891	0.00270626	-3585.11	72	2500	0.0288	0.971	-3200.15	134	2500	0.0536	0.946
837	-2872.36	43.7378	16.273	0.00162379	-3441.76	27	2500	0.0108	0.989	-3099.76	57	2500	0.0228	0.977
838	-2650.56	38.4832	17.0258	0.00104409	-3216.56	27	2500	0.0108	0.989	-2839.94	116	2500	0.0464	0.954
839	-2602.12	37.9176	16.5031	0.00356461	-2973.67	156	2500	0.0624	0.938	-2734.74	236	2500	0.0944	0.906
840	-3053.64	37.5776	21.4895	0.00129924	-3590.07	100	2500	0.04	0.96	-3223.23	156	2500	0.0624	0.938
841	-2229.09	30.7072	19.0621	0.00330166	-2700.07	72	2500	0.0288	0.971	-2387.34	146	2500	0.0584	0.942
842	-2975.5	37.3891	24.1141	0.00154613	-3719.66	17	2500	0.0068	0.993	-3123.26	259	2500	0.1036	0.896
843	-2366.31	36.5667	18.3318	0.00275436	-2903.84	26	2500	0.0104	0.99	-2547.85	93	2500	0.0372	0.963
844	-2757.59	36.3197	27.1789	0.00184047	-3390.42	26	2500	0.0104	0.99	-2903.92	204	2500	0.0816	0.918
845	-2577.06	32.5612	21.1948	0.00218524	-2991.67	137	2500	0.0548	0.945	-2727.94	184	2500	0.0736	0.926
846	-2419.61	34.4013	16.9965	0.00279035	-2910.14	52	2500	0.0208	0.979	-2593.82	138	2500	0.0552	0.945
847	-2398.75	31.1274	16.5145	0.00304644	-2750.24	179	2500	0.0716	0.928	-2620.62	32	2500	0.0128	0.987
848	-2652.92	34.2884	24.5929	0.00254299	-3335.38	22	2500	0.0088	0.991	-2811.7	159	2500	0.0636	0.936
849	-2808.65	42.8007	18.6029	0.0024232	-3474.6	16	2500	0.0064	0.994	-3032.67	72	2500	0.0288	0.971
850	-3176.71	42.0515	21.6791	0.0026349	-3747.46	49	2500	0.0196	0.98	-3363	151	2500	0.0604	0.94
851	-2714.38	39.4583	23.2129	0.00361625	-3421.54	8	2500	0.0032	0.997	-2876.97	172	2500	0.0688	0.931
852	-2908.75	44.4938	20.3942	0.00465834	-3587.42	17	2500	0.0068	0.993	-3148.93	42	2500	0.0168	0.983
853	-2518.38	26.2231	28.5206	0.00404948	-2921.69	173	2500	0.0692	0.931	-2627.94	347	2500	0.1388	0.861
854	-2990.36	39.704	26.0317	0.00230006	-3629.46	22	2500	0.0088	0.991	-3145.54	197	2500	0.0788	0.921
855	-2997.65	40.5886	21.2306	0.00112975	-3764.37	7	2500	0.0028	0.997	-3215.97	101	2500	0.0404	0.96
856	-2497.17	33.328	18.7056	0.0035229	-2918.65	103	2500	0.0412	0.959	-2659.08	157	2500	0.0628	0.937
857	-3029.11	41.5269	23.3376	0.00204946	-3713.18	24	2500	0.0096	0.99	-3197.8	184	2500	0.0736	0.926
858	-2735.71	35.0096	22.6356	0.00172404	-3310.34	42	2500	0.0168	0.983	-2920.24	97	2500	0.0388	0.961
859	-3285.92	44.2209	25.3937	0.00193527	-4100.07	7	2500	0.0028	0.997	-3517.06	65	2500	0.026	0.974
860	-2540.91	34.6926	20.0451	0.0019536	-3125.16	36	2500	0.0144	0.986	-2733.09	92	2500	0.0368	0.963
861	-2653.23	35.9954	17.0462	0.00114255	-3149.35	74	2500	0.0296	0.97	-2847.83	97	2500	0.0388	0.961
862	-2545.41	30.2035	25.6521	0.00588331	-3006.63	101	2500	0.0404	0.96	-2693.73	167	2500	0.0668	0.933
863	-2885.69	31.4488	35.149	0.00328074	-3630.27	25	2500	0.01	0.99	-3049.84	132	2500	0.0528	0.947
864	-2674.15	33.4395	24.173	0.0030451	-3206.33	59	2500	0.0236	0.976	-2846	112	2500	0.0448	0.955
865	-2850.15	40.083	22.3426	0.00271391	-3522.14	20	2500	0.008	0.992	-3018.37	159	2500	0.0636	0.936
866	-2917.18	36.9321	20.5355	0.00175176	-3341.4	154	2500	0.0616	0.938	-3091.89	138	2500	0.0552	0.945
867	-2844.88	35.8515	21.6471	0.00133585	-3337.56	105	2500	0.042	0.958	-3055.8	77	2500	0.0308	0.969
868	-2699.62	33.8371	23.4283	0.00241834	-3276.67	51	2500	0.0204	0.98	-2879.77	101	2500	0.0404	0.96
869	-2683.17	29.8309	31.4163	0.00333202	-3384.7	15	2500	0.006	0.994	-2836.52	181	2500	0.0724	0.928
870	-3015.55	38.4729	30.3444	0.0030484	-3689.38	28	2500	0.0112	0.989	-3153.28	267	2500	0.1068	0.893
871	-2582.18	35.8212	19.1071	0.00279641	-3038.5	90	2500	0.036	0.964	-2781.35	87	2500	0.0348	0.965
872	-3137.92	41.3521	20.1486	0.00142998	-3753.55	45	2500	0.018	0.982	-3352.98	112	2500	0.0448	0.955
873	-2508.28	34.0292	20.3273	0.0023049	-3042.34	47	2500	0.0188	0.981	-2651.64	182	2500	0.0728	0.927
874	-3018.66	37.5165	21.6192	0.00121715	-3564.63	74	2500	0.0296	0.97	-3226.47	85	2500	0.034	0.966
875	-2918.57	38.1582	29.037	0.00357785	-3593.14	22	2500	0.0088	0.991	-3065.7	210	2500	0.084	0.916
876	-2724.53	34.7847	25.4273	0.0034892	-3338.68	32	2500	0.0128	0.987	-2925.33	64	2500	0.0256	0.974
877	-2832.01	36.2869	25.6203	0.00378153	-3575.5	14	2500	0.0056	0.994	-3005.94	148	2500	0.0592	0.941
878	-3013.78	38.4892	21.4166	0.00162607	-3438.58	149	2500	0.0596	0.94	-3210.05	103	2500	0.0412	0.959
879	-2956.98	36.7935	19.584	0.000821193	-3455.79	108	2500	0.0432	0.957	-3136.43	143	2500	0.0572	0.943
880	-2741.2	32.1773	25.4391	0.00218006	-3360.79	38	2500	0.0152	0.985	-2914.1	121	2500	0.0484	0.952
881	-2772.66	40.8888	21.5647	0.0014183	-3450.93	10	2500	0.004	0.996	-2921.8	201	2500	0.0804	0.92
882	-2538.51	32.9867	19.3163	0.00304723	-3084.12	45	2500	0.018	0.982	-2705.92	154	2500	0.0616	0.938
883	-2913.98	40.8084	23.1325	0.00172634	-3711.58	9	2500	0.0036	0.996	-3111.94	120	2500	0.048	0.952
884	-3016.2	44.9477	19.7871	0.00288693	-3609.94	35	2500	0.014	0.986	-3231.38	85	2500	0.034	0.966
885	-2877.74	40.2911	21.5215	0.00316942	-3469.2	37	2500	0.0148	0.985	-3071.72	97	2500	0.0388	0.961
886	-2385.25	26.6024	23.3409	0.00335804	-2732.84	216	2500	0.0864	0.914	-2515.68	179	2500	0.0716	0.928
887	-2729.94	32.0651	36.4569	0.00463763	-3423.43	16	2500	0.0064	0.994	-2834.96	387	2500	0.1548	0.845
888	-2407.43	26.3603	23.7647	0.00378392	-2817.01	154	2500	0.0616	0.938	-2541.89	193	2500	0.0772	0.923
889	-2489.36	33.9636	17.553	0.00120468	-2929.54	85	2500	0.034	0.966	-2650.72	163	2500	0.0652	0.935
890	-2623.18	34.9609	18.4998	0.00134981	-3100.45	78	2500	0.0312	0.969	-2778.07	198	2500	0.0792	0.921
891	-2974.72	35.7192	22.4018	0.00132356	-3549.28	67	2500	0.0268	0.973	-3170.62	87	2500	0.0348	0.965
892	-2643.44	41.7161	19.3845	0.00277834	-3215.8	30	2500	0.012	0.988	-2803.12	166	2500	0.0664	0.934
893	-2956	32.7535	22.7962	0.00188331	-3482.93	75	2500	0.03	0.97	-3187.57	57	2500	0.0228	0.977
894	-2898.96	47.4602	16.9843	0.00104464	-3490.75	25	2500	0.01	0.99	-3092.17	110	2500	0.044	0.956
895	-2638.11	32.853	21.6381	0.00159777	-3232.13	56	2500	0.0224	0.978	-2846.94	48	2500	0.0192	0.981
896	-3104.65	40.3744	25.4212	0.00282331	-3830.44	22	2500	0.0088	0.991	-3276.65	167	2500	0.0668	0.933
897	-2652.16	31.436	22.3672	0.00151414	-3201.04	67	2500	0.0268	0.973	-2800.47	206	2500	0.0824	0.918
898	-2356.55	34.1363	18.7562	0.00237875	-2813.81	67	2500	0.0268	0.973	-2482.62	246	2500	0.0984	0.902
899	-2984.62	41.8171	20.3416	0.00130079	-3719.07	11	2500	0.0044	0.996	-3225.56	60	2500	0.024	0.976
900	-2757.62	33.3526	25.6317	0.00262152	-3371.31	56	2500	0.0224	0.978	-2957.51	79	2500	0.0316	0.968
901	-2632.55	28.174	25.2484	0.0034562	-3064.5	166	2500	0.0664	0.934	-2791.1	158	2500	0.0632	0.937
902	-2779.22	34.2687	26.1969	0.00415371	-3366.51	52	2500	0.0208	0.979	-2959.63	111	2500	0.0444	0.956
903	-2397.41	33.5176	20.2563	0.00397208	-2884.13	49	2500	0.0196	0.98	-2572.71	93	2500	0.0372	0.963
904	-2929.81	36.4505	22.6877	0.00405413	-3591.85	36	2500	0.0144	0.986	-3135.41	81	2500	0.0324	0.968
905	-2671.65	35.4089	16.6425	0.00128646	-3183.92	64	2500	0.0256	0.974	-2896.78	33	2500	0.0132	0.987
906	-2532.41	39.4226	14.6792	0.00118793	-2942.29	81	2500	0.0324	0.968	-2713.03	141	2500	0.0564	0.944
907	-2742.3	32.2123	36.5604	0.00308573	-3706.55	5	2500	0.002	0.998	-2875	254	2500	0.1016	0.898
908	-2767.7	41.9707	16.6987	0.00108058	-3384.96	17	2500	0.0068	0.993	-2982.21	94	2500	0.0376	0.962
909	-2601	29.5996	23.9701	0.00414873	-2989.86	192	2500	0.0768	0.923	-2766.49	126	2500	0.0504	0.95
910	-2136.04	27.3477	19.5436	0.00499108	-2487.87	145	2500	0.058	0.942	-2271.93	153	2500	0.0612	0.939
911	-2502.93	33.3385	18.3284	0.00198653	-2879.24	161	2500	0.0644	0.936	-2659.12	171	2500	0.0684	0.932
912	-3146.73	41.1431	22.6883	0.00140263	-3859.36	18	2500	0.0072	0.993	-3339.85	143	2500	0.0572	0.943
913	-2961.17	36.4418	30.3905	0.00272856	-3659.32	12	2500	0.0048	0.995	-3148.26	132	2500	0.0528	0.947
914	-2224.65	33.3677	16.9696	0.00219308	-2612.22	108	2500	0.0432	0.957	-2350.35	234	2500	0.0936	0.906
915	-3119.45	38.1643	22.2921	0.00147795	-3756.46	30	2500	0.012	0.988	-3351.97	61	2500	0.0244	0.976
916	-2839.5	33.6733	27.0393	0.00187226	-3446.55	45	2500	0.018	0.982	-3043.08	76	2500	0.0304	0.97
917	-2412.57	28.846	26.2988	0.00470052	-2821.43	165	2500	0.066	0.934	-2585.72	84	2500	0.0336	0.966
918	-2428.44	36.187	20.2511	0.00375229	-2990.83	22	2500	0.0088	0.991	-2552.83	292	2500	0.1168	0.883
919	-2680.68	34.0765	24.2817	0.00281021	-3242.27	52	2500	0.0208	0.979	-2836.13	164	2500	0.0656	0.934
920	-2522.8	29.8838	29.9252	0.00267995	-2983.85	109	2500	0.0436	0.956	-2643.11	285	2500	0.114	0.886
921	-2624.51	27.0278	38.0587	0.00572196	-3153.28	104	2500	0.0416	0.958	-2733.86	326	2500	0.1304	0.87
922	-2700.84	34.5695	20.6328	0.00182408	-3255.42	55	2500	0.022	0.978	-2860.56	176	2500	0.0704	0.93
923	-2868.15	31.9323	25.1368	0.00114024	-3399.91	90	2500	0.036	0.964	-3079.78	53	2500	0.0212	0.979
924	-2970.37	45.9409	16.8945	0.000918424	-3630.31	17	2500	0.0068	0.993	-3167.76	132	2500	0.0528	0.947
925	-2509.15	30.9865	23.6394	0.00244832	-2956.38	106	2500	0.0424	0.958	-2665.75	134	2500	0.0536	0.946
926	-2634.18	35.2347	29.8445	0.00449165	-3318.24	19	2500	0.0076	0.992	-2759.94	292	2500	0.1168	0.883
927	-2781.4	42.8154	18.0235	0.002952	-3267.6	57	2500	0.0228	0.977	-2935.5	216	2500	0.0864	0.914
928	-2610.83	31.3387	23.2184	0.00491352	-3114.09	81	2500	0.0324	0.968	-2749.03	211	2500	0.0844	0.916
929	-3043.52	41.3272	17.8768	0.00105631	-3560.12	73	2500	0.0292	0.971	-3266.97	72	2500	0.0288	0.971
930	-2351.1	31.6997	19.125	0.00395298	-2772.56	92	2500	0.0368	0.963	-2505.7	156	2500	0.0624	0.938
931	-2828.09	36.0045	20.1364	0.00283934	-3300.59	97	2500	0.0388	0.961	-3006.61	131	2500	0.0524	0.948
932	-2746.09	38.1009	20.3463	0.00202908	-3326.62	34	2500	0.0136	0.986	-2862.8	363	2500	0.1452	0.855
933	-2914.88	36.0638	23.1667	0.00179484	-3562.71	30	2500	0.012	0.988	-3145.16	47	2500	0.0188	0.981
934	-2903.26	33.0402	22.1559	0.00181648	-3380.45	128	2500	0.0512	0.949	-3094.05	107	2500	0.0428	0.957
935	-2664.85	30.9414	23.7633	0.00224003	-3197.25	74	2500	0.0296	0.97	-2844.18	103	2500	0.0412	0.959
936	-3105.43	37.7993	21.9545	0.00354241	-3718.33	60	2500	0.024	0.976	-3279.64	156	2500	0.0624	0.938
937	-3204.85	53.3627	18.912	0.00125878	-3923.23	6	2500	0.0024	0.998	-3479.09	25	2500	0.01	0.99
938	-2254.43	26.7534	24.7676	0.00249287	-2600.79	218	2500	0.0872	0.913	-2355.75	323	2500	0.1292	0.871
939	-2547.98	37.5816	18.3579	0.00247841	-3154.91	24	2500	0.0096	0.99	-2750.91	85	2500	0.034	0.966
940	-2448.4	27.5009	21.1997	0.00251443	-2812.22	215	2500	0.086	0.914	-2567.29	243	2500	0.0972	0.903
941	-2179.39	28.1902	23.4288	0.0040713	-2671.41	45	2500	0.018	0.982	-2312.91	169	2500	0.0676	0.932
942	-2878.49	41.1608	19.8092	0.00118343	-3586.21	17	2500	0.0068	0.993	-3103.18	70	2500	0.028	0.972
943	-2963.42	38.1081	27.4519	0.00205806	-3599.95	36	2500	0.0144	0.986	-3132.35	159	2500	0.0636	0.936
944	-2993.56	39.8831	24.0444	0.00356185	-3794.31	12	2500	0.0048	0.995	-3197.07	101	2500	0.0404	0.96
945	-2705.04	42.1998	19.3268	0.00315987	-3237.94	32	2500	0.0128	0.987	-2878.07	139	2500	0.0556	0.944
946	-2920.27	31.7213	21.2606	0.0015486	-3426.65	119	2500	0.0476	0.952	-3105.28	120	2500	0.048	0.952
947	-2758.26	33.1619	20.3171	0.00252107	-3117.52	219	2500	0.0876	0.912	-2907.79	207	2500	0.0828	0.917
948	-3260	42.8651	24.2314	0.00186251	-4065	10	2500	0.004	0.996	-3457.83	125	2500	0.05	0.95
949	-2640.03	30.3779	27.9368	0.00221416	-3137.97	109	2500	0.0436	0.956	-2708.55	656	2500	0.2624	0.738
950	-2770.8	35.0574	26.7443	0.00453959	-3334.19	50	2500	0.02	0.98	-2926.64	168	2500	0.0672	0.933
951	-2670	42.5692	20.061	0.00343252	-3371.6	9	2500	0.0036	0.996	-2861.67	93	2500	0.0372	0.963
952	-3035.96	36.7659	37.9056	0.00413117	-3868.02	15	2500	0.006	0.994	-3163.02	338	2500	0.1352	0.865
953	-2682.31	40.4627	21.4677	0.00441022	-3443.97	5	2500	0.002	0.998	-2925.23	46	2500	0.0184	0.982
954	-2408.32	30.316	20.7628	0.00201869	-2818.22	138	2500	0.0552	0.945	-2526.57	303	2500	0.1212	0.879
955	-3456	46.3614	22.1181	0.00127555	-4081.57	37	2500	0.0148	0.985	-3665.14	115	2500	0.046	0.954
956	-2630.46	32.6768	23.6802	0.00241499	-3302.26	25	2500	0.01	0.99	-2849.6	51	2500	0.0204	0.98
957	-2958.88	47.3212	17.8731	0.00159131	-3507.41	32	2500	0.0128	0.987	-3078.53	370	2500	0.148	0.852
958	-2933.34	40.6774	20.8072	0.00202325	-3582.91	27	2500	0.0108	0.989	-3110.54	149	2500	0.0596	0.94
959	-2994.41	39.3985	19.6816	0.00124497	-3721.06	19	2500	0.0076	0.992	-3216.9	82	2500	0.0328	0.967
960	-2371.05	34.5243	15.4849	0.00156282	-2815.06	76	2500	0.0304	0.97	-2569.87	53	2500	0.0212	0.979
961	-2397.48	27.8949	33.1066	0.00434788	-2954.1	51	2500	0.0204	0.98	-2515.79	273	2500	0.1092	0.891
962	-2716.09	31.7922	22.268	0.00471914	-3170.86	128	2500	0.0512	0.949	-2924.39	58	2500	0.0232	0.977
963	-2663.67	36.1752	20.4398	0.00279254	-3189.84	64	2500	0.0256	0.974	-2797.44	230	2500	0.092	0.908
964	-2525.36	36.4369	23.2547	0.0046331	-3093.9	34	2500	0.0136	0.986	-2699.32	140	2500	0.056	0.944
965	-2971.81	32.8836	26.407	0.00226267	-3435.73	151	2500	0.0604	0.94	-3145.74	154	2500	0.0616	0.938
966	-2452.92	33.2945	17.6678	0.00236487	-2943.73	63	2500	0.0252	0.975	-2627.42	117	2500	0.0468	0.953
967	-2756.01	34.9724	30.4528	0.00538239	-3415.27	21	2500	0.0084	0.992	-2932.89	109	2500	0.0436	0.956
968	-2868.04	37.0125	22.8127	0.0022707	-3486.3	39	2500	0.0156	0.984	-3026.12	185	2500	0.074	0.926
969	-2370.91	28.6698	29.3293	0.00573041	-2871.17	67	2500	0.0268	0.973	-2460.12	419	2500	0.1676	0.832
970	-3104.84	36.8463	26.8049	0.00167202	-3798.16	29	2500	0.0116	0.988	-3234.67	319	2500	0.1276	0.872
971	-2442.6	36.1223	13.9779	0.00182329	-2731.34	273	2500	0.1092	0.891	-2595.22	208	2500	0.0832	0.917
972	-2515.31	40.2536	20.2785	0.00224049	-3139.32	16	2500	0.0064	0.994	-2722.39	88	2500	0.0352	0.965
973	-2876.72	39.2533	23.872	0.00305172	-3587.13	20	2500	0.008	0.992	-3081.24	80	2500	0.032	0.968
974	-2335.63	26.5563	22.6585	0.00224811	-2743.6	143	2500	0.0572	0.943	-2459.7	238	2500	0.0952	0.905
975	-2744.36	33.2049	29.3941	0.0034483	-3484.8	16	2500	0.0064	0.994	-2939.76	81	2500	0.0324	0.968
976	-3024.4	40.829	21.586	0.00120423	-3674.81	24	2500	0.0096	0.99	-3198.38	157	2500	0.0628	0.937
977	-2898.4	37.3993	22.9209	0.00204799	-3599.46	18	2500	0.0072	0.993	-3087.04	130	2500	0.052	0.948
978	-3175.77	34.4357	26.5145	0.00198172	-3866.17	53	2500	0.0212	0.979	-3396.54	73	2500	0.0292	0.971
979	-2387.32	31.9469	19.8444	0.00224575	-2842.8	89	2500	0.0356	0.964	-2526.31	233	2500	0.0932	0.907
980	-3000.51	43.0082	18.9604	0.00170576	-3684.21	20	2500	0.008	0.992	-3246.47	40	2500	0.016	0.984
981	-2992.47	34.8473	26.8001	0.00220244	-3626.04	43	2500	0.0172	0.983	-3163.39	127	2500	0.0508	0.949
982	-2455.32	37.009	15.4427	0.00352215	-2855.18	102	2500	0.0408	0.959	-2591.69	236	2500	0.0944	0.906
983	-3113.27	37.2404	23.4837	0.0020317	-3717.74	65	2500	0.026	0.974	-3291.75	166	2500	0.0664	0.934
984	-2559.2	34.14	19.3012	0.00256805	-2912.22	190	2500	0.076	0.924	-2665.83	384	2500	0.1536	0.846
985	-2964	41.2375	23.719	0.00257695	-3763.06	12	2500	0.0048	0.995	-3191.55	61	2500	0.0244	0.976
986	-2424.38	32.4808	17.6514	0.00145136	-2932.43	73	2500	0.0292	0.971	-2644.16	41	2500	0.0164	0.984
987	-2782.68	35.9955	23.3402	0.00255192	-3383.69	48	2500	0.0192	0.981	-2937.94	182	2500	0.0728	0.927
988	-3355.34	39.2038	31.9932	0.00274018	-4168.73	11	2500	0.0044	0.996	-3496.02	284	2500	0.1136	0.886
989	-3031.94	35.2601	32.5881	0.0031059	-3771.84	26	2500	0.0104	0.99	-3207.85	134	2500	0.0536	0.946
990	-3130.17	36.5797	26.1744	0.00150558	-3761.01	46	2500	0.0184	0.982	-3354.95	76	2500	0.0304	0.97
991	-3214.97	37.5892	28.0858	0.00200985	-4073.88	11	2500	0.0044	0.996	-3508.87	13	2500	0.0052	0.995
992	-2767.49	37.0329	19.6677	0.001661	-3238.58	90	2500	0.036	0.964	-2949.64	116	2500	0.0464	0.954
993	-2581.46	29.9677	20.8551	0.00225562	-3032	126	2500	0.0504	0.95	-2754.67	102	2500	0.0408	0.959
994	-3001.92	42.4427	26.6618	0.00327745	-3879.96	5	2500	0.002	0.998	-3224	78	2500	0.0312	0.969
995	-2454.84	37.6316	16.5883	0.00288602	-2929.43	57	2500	0.0228	0.977	-2573.46	306	2500	0.1224	0.878
996	-2718.14	34.8942	19.5111	0.00113554	-3223.62	72	2500	0.0288	0.971	-2921.77	64	2500	0.0256	0.974
997	-2490.11	38.2735	17.3219	0.00243377	-2955.21	58	2500	0.0232	0.977	-2608.52	306	2500	0.1224	0.878
998	-2469.39	28.8959	25.7242	0.00447733	-2958.4	100	2500	0.04	0.96	-2582.46	289	2500	0.1156	0.884
999	-2800.52	35.1301	27.2053	0.00244484	-3337.14	62	2500	0.0248	0.975	-2914.29	338	2500	0.1352	0.865
1000	-2453.36	37.8045	15.869	0.00192949	-2831.9	118	2500	0.0472	0.953	-2628.65	118	2500	0.0472	0.953
Passing Rate								136(13.6%)	1000 (100%)				623 (62.3%)	1000 (100%)
Mean	-2748.41	35.7543	22.9902	0.00266094	-3321.01	66.949	2500	0.0267796	0.973215	-2917.17	171.071	2500	0.0684284	0.931574
Std. Err.	8.23256	0.162881	0.146983	4.02326e-05	11.3048	1.87559	0	0.000750236	0.000750081	8.91071	3.09525	0	0.0012381	0.0012384
*N=2500 is the number of Gibb samples selected from 25,000 simulated communities (i.e., every tenth iteration of the last 25,000 Gibbs samples, while the first 25,000 simulations were discarded as the burn-in), it is chosen to compute the pseudo p-value below for conducting the neutrality test. L0 is the actual log-likelihood, which is compared with the log-likelihood of each simulated community.…
**Due to the typo/error in Harris et al. (2017), the PM-values exhibited here should be adjusted as (PM=1−PMS), where PMS is output from their computational program. Similarly, the PL-values should be adjusted as (PL=1−PLS), where PLS is output from their computational program. Similarly, the NMS and NLS reported here are from the output of Harris et al. (2017) software. When computing the P-valu…

## Sheet: TableS2
Table S2. Results of fitting Tang & Zhou's (2013) NNH (niche-neutral hybrid) model with 1000 times of re-sampling ro the DT datasets
ID	J	S	θ	m	x	γ	R2	c2	p-value	N	Npass	%(pass)
1	4086.33	29.3333	6.20016	0.000283839	0.849069	1.23475	0.812414	8.3356	0.682963	3	3	100
2	8916	40.6667	6.5309	0.000266747	0.793528	1.42195	0.903625	12.4644	0.489981	6	5	83.3333
3	7209	49.5	9.42546	0.000228716	0.82513	1.29167	0.879444	15.3196	0.224424	6	6	100
4	5603.17	41.3333	4.40513	0.000382095	0.737554	1.91233	0.892819	10.2087	0.511715	6	6	100
5	5439.5	38.1667	7.29396	0.0003789	0.831457	1.25566	0.904977	9.14972	0.690092	6	6	100
6	34495.1	49.5714	13.9227	0.000144498	0.798608	1.19758	0.937041	15.931	0.386655	7	7	100
7	7707.57	50.1429	6.24465	0.000321746	0.782906	1.74356	0.833177	14.766	0.193464	7	6	85.7143
8	11346	50.1667	7.56425	0.000170271	0.831489	1.48096	0.841001	11.247	0.507878	6	6	100
9	23037.4	55.4286	6.22307	0.000112104	0.780599	1.759	0.937874	10.6709	0.711678	7	7	100
10	9304.8	48.2	15.7754	0.000187171	0.767498	0.95739	0.877341	21.9088	0.0385553	5	4	80
11	16838	46.8571	8.44904	0.000163678	0.831103	1.31707	0.922988	7.56506	0.870737	7	7	100
12	7772.86	47.2857	8.36554	0.000210608	0.812528	1.42223	0.806805	19.1937	0.0577047	7	7	100
13	7660.57	49.1429	10.9196	0.000261548	0.802404	1.24059	0.970909	6.20914	0.938209	7	6	85.7143
14	12231.5	40.1667	5.79965	0.000277496	0.808692	1.50227	0.824814	14.3082	0.352502	6	6	100
15	9692	46.1429	10.2938	0.00023099	0.806846	1.26183	0.953052	9.78431	0.634877	7	7	100
16	9894.29	50	9.22123	0.000170138	0.803057	1.36864	0.955227	8.24226	0.765923	7	7	100
17	21861.8	49.1667	17.8378	0.000116819	0.744948	1.23509	0.933184	21.6337	0.0864612	6	5	83.3333
18	12677	47.1667	6.09785	0.000243626	0.785748	1.68326	0.878569	13.5355	0.407352	6	6	100
19	11652.1	50.5714	5.66297	0.000230001	0.737017	1.93445	0.937075	13.1966	0.432743	7	7	100
20	9706.67	42.3333	7.9456	0.000264291	0.774412	1.57708	0.969759	4.94274	0.976432	6	6	100
21	5994.43	40.8571	7.59997	0.000347703	0.784678	1.38683	0.89634	14.2732	0.283601	7	7	100
22	6662.33	43.1667	6.06517	0.00038251	0.758652	1.66351	0.909464	14.452	0.272782	6	6	100
23	5225.43	39.1429	5.79365	0.000532189	0.782158	1.57408	0.952454	6.11594	0.865517	7	7	100
24	7633.14	47.4286	6.30501	0.000299436	0.797065	1.61835	0.907794	10.7852	0.547412	7	7	100
25	7731.33	54	10.0128	0.000244584	0.831944	1.2493	0.941626	6.39298	0.894991	3	3	100
26	16433.2	51.4	12.4991	9.67461e-05	0.877712	0.826834	0.918862	6.74731	0.9147	5	5	100
27	10411	41.2857	9.69108	0.000317076	0.761245	1.42629	0.964421	27.1855	0.0117331	7	6	85.7143
28	7094.17	37	5.70389	0.000372343	0.767763	1.7477	0.926712	11.0212	0.527105	6	6	100
29	5246.6	50	12.1202	0.000372738	0.748101	1.41749	0.951324	10.0954	0.52183	5	5	100
30	10712.7	46.2857	2.66767	0.000440318	0.7449	2.17707	0.869081	9.53472	0.656706	7	7	100
31	9001.25	42.25	5.63572	0.000230811	0.806358	1.44703	0.962318	3.77144	0.993389	4	3	75
32	5417.4	38.4	9.06732	0.000265963	0.807922	1.07439	0.929497	10.5019	0.485884	5	5	100
33	20832.8	50.4	11.8398	7.32003e-05	0.800844	1.22815	0.949645	10.6647	0.638883	5	5	100
34	7528.17	39	7.05361	0.000319754	0.844701	1.32494	0.884259	11.0965	0.520671	6	6	100
35	9381.2	53.2	11.2546	0.000169937	0.805226	1.13651	0.973531	3.41561	0.991831	5	5	100
36	10009	44	10.0029	0.000401337	0.843558	1.12181	0.890056	12.0117	0.526688	5	5	100
37	5347.4	41.2	9.63689	0.000317772	0.834556	1.0876	0.938992	4.64591	0.947096	5	5	100
38	11101	43.5714	6.17938	0.000306306	0.785778	1.59337	0.890009	13.4617	0.41281	7	6	85.7143
39	14212.2	46.6	7.01188	0.000275417	0.804577	1.56251	0.8742	11.7889	0.545023	5	5	100
40	9051.33	57.6667	13.3149	0.000121467	0.90673	0.768894	0.880031	6.17787	0.861237	3	3	100
41	18917.9	54.4444	11.7786	0.000277679	0.813028	1.24887	0.976853	5.9775	0.946968	9	9	100
42	6131	41.25	6.69446	0.000355343	0.808337	1.51043	0.95288	8.64	0.733333	8	8	100
43	11158	49.3333	10.1597	0.000112606	0.858428	1.04788	0.949392	8.12258	0.775479	6	6	100
44	9461.5	50.375	8.47089	0.000195617	0.798832	1.42932	0.934617	9.28952	0.678023	8	8	100
45	13035.6	60.4	12.6114	0.000154483	0.82958	1.08782	0.971962	4.23029	0.988486	5	5	100
46	9406.2	56.4	8.88291	0.000169333	0.842114	1.37875	0.795032	15.7452	0.150858	5	5	100
47	9771.5	45.8333	10.3093	0.000480737	0.74348	1.86038	0.954578	5.27438	0.948181	6	6	100
48	21453.8	54.5	10.2165	0.000224906	0.792299	1.52117	0.945336	10.1032	0.754597	6	6	100
49	9917.25	45.375	3.82621	0.000377522	0.753934	1.97107	0.928791	9.98788	0.694925	8	8	100
50	11567.8	46	11.2171	0.000122236	0.756579	1.19268	0.907218	15.3722	0.284698	4	3	75
51	9826.25	48.375	5.64967	0.000299346	0.755804	1.82601	0.959341	7.58977	0.816311	8	8	100
52	4685	44.5	9.94906	0.000331488	0.825742	1.13214	0.924347	8.26186	0.689672	4	4	100
53	8885.62	47.25	6.42806	0.000258598	0.776284	1.62283	0.956701	5.84144	0.923863	8	8	100
54	6055.5	48	5.56313	0.000246749	0.8433	1.4177	0.453951	13.6043	0.19182	2	2	100
55	7482.83	41.6667	9.94837	0.000271052	0.803101	1.26671	0.937329	8.16986	0.771719	6	5	83.3333
56	11639.2	54.125	14.4452	0.000184385	0.770222	1.22182	0.962978	17.798	0.16534	8	7	87.5
57	8165.67	48	9.09247	0.000199828	0.824327	1.24229	0.920212	11.9739	0.447776	6	6	100
58	6288	52.3333	12.3607	0.000398008	0.795848	1.35427	0.982693	1.52678	0.998849	3	3	100
59	3670.5	33.5	5.41852	0.000520221	0.787195	1.56689	0.926702	6.44301	0.842232	4	4	100
60	8027.86	51	10.8256	0.000223703	0.790817	1.26021	0.936664	10.2198	0.596687	7	6	85.7143
61	8016	53.4286	6.44573	0.000338217	0.773592	1.69804	0.949395	7.07056	0.852915	7	7	100
62	9301.5	46.875	11.7156	0.000184937	0.812825	1.06433	0.967052	8.54954	0.80605	8	7	87.5
63	11860.5	54.5	12.7174	7.59628e-05	0.860999	0.880654	0.933176	4.84906	0.962831	2	2	100
64	11374.6	49.6	5.94876	0.000268855	0.735045	1.91898	0.840565	18.3525	0.144587	5	5	100
65	9091.6	45.4	8.52128	0.000160376	0.775756	1.36796	0.929496	11.5122	0.485604	5	4	80
66	7691.5	45.5	12.4584	0.000262852	0.842834	0.869908	0.94299	10.8313	0.624945	6	6	100
67	19083.6	53.5	12.4382	9.41888e-05	0.797235	1.21108	0.946218	194.652	0	8	7	87.5
68	7919.25	48.25	10.0513	0.000199398	0.812846	1.22578	0.762272	23.8023	0.0216375	4	3	75
69	13452.3	59.7143	13.3016	0.000253421	0.7987	1.4116	0.963178	7.15254	0.928671	7	7	100
70	8914	50.1111	8.0553	0.000350085	0.823277	1.38555	0.975935	8.17462	0.832041	9	9	100
71	11579	54.25	9.46424	0.000188984	0.749274	1.63908	0.972448	6.78648	0.871395	8	8	100
72	17109.9	54.1429	9.08329	0.000259999	0.786927	1.63813	0.921714	15.1598	0.297481	7	7	100
73	6461	52.3333	10.9049	0.000262141	0.785453	1.24398	0.925735	10.5067	0.485467	3	3	100
74	12846.5	47.8333	10.2484	0.000197886	0.832355	1.28245	0.935992	8.75716	0.846285	6	6	100
75	9896.33	39.3333	7.99372	0.000277557	0.797165	1.29493	0.883467	10.6461	0.559463	3	3	100
76	10823	49.2	6.26173	0.000393035	0.749606	1.97152	0.83198	20.0194	0.0667196	5	4	80
77	5202.8	41.4	6.32284	0.000341401	0.851575	1.38293	0.807691	12.442	0.331355	5	5	100
78	10803.1	43.75	10.7679	0.000226273	0.800893	1.19349	0.952228	9.64905	0.72235	8	7	87.5
79	2518.6	38.4	15.2545	0.000463643	0.731835	0.947944	0.975879	6.29824	0.789615	5	4	80
80	9233.8	36.8	7.43208	0.000309553	0.805063	1.3675	0.883066	11.1522	0.598072	5	5	100
81	10625.7	51.8333	10.0551	0.000136472	0.856566	1.18562	0.87781	10.7543	0.550088	6	6	100
82	7414.6	43	6.73587	0.000196739	0.807046	1.36536	0.79972	16.7782	0.114611	5	5	100
83	6223.8	40.6	7.55725	0.000258412	0.825116	1.36082	0.876556	11.7828	0.463273	5	5	100
84	16461.2	51.5	11.0465	0.00012423	0.790122	1.4409	0.899353	13.5961	0.480213	6	6	100
85	19655.7	49.1667	7.10999	0.000194265	0.838475	1.45211	0.895622	10.4707	0.727023	6	6	100
86	14790.7	48.8333	11.2456	0.000223707	0.829466	1.11689	0.897865	14.7061	0.326055	6	6	100
87	9164.14	40.1429	14.0683	0.000382866	0.806643	1.05688	0.972803	24.7436	0.0249398	7	6	85.7143
88	6401.67	48.5	9.69595	0.00024919	0.755184	1.50942	0.913742	8.32365	0.684052	6	5	83.3333
89	6977.83	40.1667	11.4988	0.000356887	0.772553	1.1199	0.950842	76.1565	5.79411e-11	6	5	83.3333
90	15910.1	53.5	8.66472	0.000225046	0.786051	1.51721	0.923472	13.6128	0.478934	8	8	100
91	9405.75	40.75	6.94243	0.000203426	0.822326	1.48665	0.910798	4.452	0.973833	4	4	100
92	5344	47.75	5.26874	0.000389668	0.76314	1.85772	0.894961	6.4475	0.841902	4	4	100
93	7275.6	51.4	9.04402	0.000309402	0.807749	1.37285	0.919159	11.2254	0.509707	5	5	100
94	8767	41.8	2.80046	0.000461787	0.735973	2.16457	0.913427	7.523	0.87323	5	5	100
95	9803	44.5714	11.8515	0.000175136	0.765073	1.09641	0.952457	1483.76	0	7	5	71.4286
96	5668.75	43	8.18161	0.000415646	0.821762	1.31716	0.920588	11.5456	0.482827	8	8	100
97	13427.8	51.4	11.7221	0.000281578	0.77803	1.34217	0.90728	9.14023	0.690908	5	5	100
98	11919.5	43.8333	12.4769	0.000235784	0.808734	1.08825	0.850992	19.1089	0.119767	6	6	100
99	21674.7	62	11.3724	0.000120895	0.797348	1.43264	0.938892	10.5721	0.719279	6	6	100
100	10645.6	46.125	11.0981	0.000253935	0.8338	1.18796	0.943318	12.9038	0.455273	8	8	100
101	12635.6	52.8	13.1469	0.000256216	0.858601	1.04656	0.957169	8.33868	0.820857	5	5	100
102	9845.88	45	8.25825	0.000235666	0.817453	1.27879	0.964898	7.44604	0.877728	8	8	100
103	28124.2	46	14.9465	0.000137067	0.834369	1.12637	0.830673	21.4901	0.0897164	4	3	75
104	14724.2	53	9.72429	0.000497121	0.809247	1.44886	0.869221	9.00724	0.702312	4	4	100
105	21588.2	48.2	10.5993	0.00014828	0.865167	1.03954	0.94102	6.1067	0.942183	5	5	100
106	15143.2	53.3333	10.0241	9.17491e-05	0.815106	1.2723	0.867885	16.5269	0.221841	6	5	83.3333
107	6119.33	40.8333	6.4561	0.000338854	0.760045	1.76708	0.891882	6.99722	0.799308	6	6	100
108	6123	42.125	7.73982	0.000282846	0.829567	1.28274	0.922726	10.0674	0.610044	8	8	100
109	6521.8	45	9.32311	0.000203483	0.846082	1.06664	0.911691	8.07738	0.706356	5	5	100
110	10737.2	42.4	8.63487	0.000194211	0.709262	1.57496	0.949816	1474.74	0	5	4	80
111	12771.4	45.6	10.1839	0.000167804	0.829332	1.0991	0.934067	20.5781	0.112943	5	4	80
112	8315.83	35.6667	5.64933	0.000330803	0.799599	1.45693	0.934124	5.79396	0.92611	6	6	100
113	19411.2	52.75	13.5544	0.000110918	0.793006	1.15351	0.917897	30.861	0.00579728	8	7	87.5
114	6071	42.4	6.40852	0.000371696	0.770574	1.60775	0.92377	9.03888	0.699606	5	5	100
115	8873.8	51.6	9.42015	0.000229124	0.791865	1.38189	0.91953	9.99508	0.694337	5	5	100
116	7805.83	44	9.2935	0.000235657	0.820405	1.35992	0.950616	5.66955	0.931815	6	6	100
117	7477	43.6	3.35834	0.000384964	0.719399	2.11433	0.811218	13.3574	0.27061	5	4	80
118	10965.8	44.8	6.60526	0.000355411	0.779632	1.63138	0.8755	12.0239	0.525683	5	4	80
119	12338.7	49	11.716	0.000184383	0.775702	1.33253	0.956775	18.258	0.147968	9	9	100
120	22494.3	54.8333	8.49248	0.000176768	0.756154	1.65898	0.964631	5.67146	0.974105	6	6	100
121	5950	56.25	6.43727	0.000311186	0.740958	1.83894	0.947534	5.17883	0.922197	4	3	75
122	19110.1	53.5	16.569	0.000109057	0.753469	1.11052	0.904274	20.0488	0.0939992	8	5	62.5
123	6848.14	40.1429	5.30425	0.000464234	0.747553	1.8615	0.828147	13.2871	0.274976	7	7	100
124	8204.83	47.1667	9.49413	0.000210154	0.789962	1.29677	0.957282	10.6809	0.637533	6	6	100
125	19471.8	56.4	8.52793	0.000183229	0.7876	1.59649	0.888938	14.5402	0.410292	5	5	100
126	4032.25	43.625	9.6407	0.000331111	0.824206	1.15153	0.971344	6.0617	0.869216	8	8	100
127	10761.7	51	10.4393	0.000181888	0.799257	1.27394	0.952205	7.69203	0.863069	6	6	100
128	4070.33	39.6667	12.9711	0.000245499	0.787127	0.928573	0.860487	11.6431	0.391056	3	3	100
129	4177	41.5	9.3287	0.000342666	0.841305	1.09507	0.953407	7.71639	0.806882	8	8	100
130	7144.57	54.1429	10.7526	0.000300946	0.832959	1.23357	0.928879	12.579	0.400371	7	6	85.7143
131	12487	46.7143	9.00258	0.000295459	0.735195	1.59613	0.940803	7.03754	0.855123	7	5	71.4286
132	3461.5	47.25	9.66031	0.000340467	0.82916	1.13022	0.914406	6.30766	0.788787	4	4	100
133	8614.17	51.8333	8.62876	0.000265512	0.798614	1.52799	0.934418	7.53563	0.820286	6	6	100
134	8528.5	45.3333	9.00962	0.000269759	0.81778	1.30047	0.935694	9.28669	0.750963	6	6	100
135	9558	48.7143	7.52688	0.00025959	0.84001	1.4157	0.947988	8.44424	0.813504	7	7	100
136	9340.2	45	5.81525	0.000298811	0.765961	1.72194	0.932489	10.5233	0.570149	10	10	100
137	5723.14	43	7.78198	0.000303073	0.812027	1.39423	0.957972	7.35849	0.833043	7	7	100
138	16876.1	50.5714	15.1683	0.00010135	0.773039	1.16479	0.955189	27.8861	0.0147312	7	6	85.7143
139	9767.57	55.4286	11.2759	0.000200282	0.763142	1.42644	0.965733	6.84832	0.867472	7	7	100
140	6409	40.6	9.9825	0.000239624	0.79865	1.14497	0.880299	17.052	0.14765	5	5	100
141	6640.71	43.8571	10.1108	0.000237328	0.775838	1.27331	0.818381	108.293	0	7	6	85.7143
142	18473.7	43.1429	14.1842	0.000196789	0.753776	1.34744	0.900128	19.089	0.120371	7	6	85.7143
143	10654	42.4286	8.17907	0.000226366	0.857348	1.16752	0.9439	8.7368	0.792518	7	7	100
144	6001.6	39.4	6.40728	0.000237179	0.841529	1.26935	0.799348	11.17	0.429136	5	5	100
145	10275.4	56.8	15.0255	0.000263311	0.771939	1.20494	0.923445	27.4267	0.00670471	5	4	80
146	13416.3	47.1429	9.25714	0.000324304	0.808225	1.45404	0.915084	12.3352	0.500364	7	7	100
147	7214	45	8.82758	0.000222961	0.853986	1.03654	0.96064	5.70335	0.930292	6	6	100
148	8096.57	46.5714	10.3737	0.000158743	0.864998	0.978783	0.927686	10.2727	0.592052	7	7	100
149	10348.8	51.6	8.11744	0.000181119	0.848599	1.28485	0.855258	15.4171	0.219414	5	5	100
150	9130.86	49.1429	6.34493	0.000380994	0.761259	1.77653	0.949637	7.3033	0.836936	7	7	100
151	8105.25	41.5	9.07365	0.0001494	0.830941	1.1717	0.910352	6.68143	0.877929	4	4	100
152	17844.3	43.6667	15.7813	0.000280201	0.7899	1.05761	0.916633	43.833	3.27075e-05	6	4	66.6667
153	12006.8	46.3333	11.2413	0.000261942	0.831985	1.07124	0.95255	7.41303	0.829156	6	6	100
154	2985	49.6667	15.5799	0.000309906	0.825192	0.858363	0.946912	4.13273	0.902462	3	3	100
155	7992.33	56	6.46785	0.000273919	0.677929	2.00433	0.832491	18.8987	0.0910023	3	3	100
156	7385.2	41	5.62945	0.000263583	0.762379	1.62112	0.941985	8.05262	0.781005	5	5	100
157	9221.33	51.1667	10.7392	0.000277513	0.808576	1.29356	0.943396	7.84174	0.797372	6	6	100
158	16850.7	52.8333	11.9267	0.000121505	0.780202	1.27414	0.908535	23.2026	0.0393086	6	6	100
159	9912.83	42.5	6.23825	0.000734563	0.761228	1.81727	0.896074	30.4153	0.00410177	6	5	83.3333
160	9648.4	39.2	7.63828	0.000218992	0.783635	1.36465	0.923158	9.52516	0.732226	5	5	100
161	19754.8	53.3333	10.7299	0.000113248	0.850598	1.06218	0.941515	8.88282	0.838483	6	6	100
162	6897	43.5	12.7041	0.000264368	0.714263	1.33652	0.956231	11.8419	0.45846	6	5	83.3333
163	8947.4	46.2	6.16619	0.000381415	0.797097	1.6366	0.974005	3.27122	0.993307	5	5	100
164	15207.4	49.4	8.80959	0.000115731	0.833779	1.39178	0.880396	13.2808	0.504544	5	5	100
165	11130.1	45.5714	8.10201	0.000215227	0.859917	1.15983	0.918563	9.73028	0.715827	7	7	100
166	7551.83	45.8333	7.74533	0.000412426	0.744383	1.79773	0.924001	20.2054	0.0902059	6	6	100
167	15371.7	55.1667	7.11459	0.000126432	0.785133	1.66409	0.93963	9.55182	0.730108	6	6	100
168	8048.67	31.3333	8.39917	0.000115451	0.931145	0.639349	0.854173	5.01237	0.930566	3	3	100
169	9921.75	52.5	9.01755	0.000104617	0.867829	1.06755	0.921015	7.39427	0.830498	4	4	100
170	9470.4	40.6	8.01299	0.00036182	0.73045	1.52277	0.862443	1477.67	0	5	4	80
171	5916	48	9.71064	0.000243917	0.833376	1.17763	0.922902	14.8601	0.249177	7	7	100
172	4975.33	46	9.74699	0.00035	0.819248	1.31685	0.967403	6.52539	0.836114	6	6	100
173	8312	49.4	8.4796	0.000373916	0.832361	1.46018	0.910261	8.1478	0.773477	5	5	100
174	9741.86	46	11.0301	0.000159951	0.783544	1.26386	0.929005	15.4331	0.218603	7	7	100
175	12023.6	50.4	3.13524	0.000214027	0.741166	2.1605	0.787096	13.2556	0.350742	5	4	80
176	13143.8	56.6	8.51024	0.000157305	0.768573	1.63368	0.902722	14.3143	0.352086	5	5	100
177	13572.8	46.6	8.97665	0.000327284	0.81011	1.3914	0.871983	10.2813	0.670782	5	5	100
178	7307.67	45.8333	12.5736	0.000214109	0.805335	1.0471	0.974301	7.81052	0.799757	6	6	100
179	12467.7	46.2857	9.16604	0.000136336	0.787239	1.38428	0.922607	12.8925	0.456151	7	7	100
180	6944.8	37	8.36758	0.00031142	0.811673	1.3837	0.954141	11.6618	0.473209	5	5	100
181	14965.3	46.5556	10.285	0.000168973	0.815006	1.1368	0.951643	12.2955	0.582588	9	8	88.8889
182	9730.14	51.1429	9.38724	0.000248763	0.80878	1.41399	0.916858	13.6498	0.323628	7	7	100
183	15013	40	7.55319	0.00020002	0.716646	1.74672	0.865403	32.0541	0.00235833	4	3	75
184	16449.6	58.6	14.7794	0.000132575	0.870561	0.824971	0.944172	6.79566	0.912372	5	5	100
185	8165.4	42.4	9.85014	0.000197446	0.889469	0.808234	0.822937	14.5938	0.264403	5	5	100
186	14819	53.7143	12.6827	0.000118314	0.836327	1.00501	0.947265	9.05774	0.697991	7	7	100
187	16706.7	46.8333	10.8704	0.000210627	0.858335	1.01203	0.967962	5.20126	0.98281	6	6	100
188	6199.71	45.2857	10.193	0.000330405	0.751796	1.44713	0.970412	7.62962	0.866865	7	7	100
189	8537	50.6667	14.4772	0.000252332	0.849035	0.855202	0.853878	10.1859	0.51375	3	3	100
190	3657	51.8	12.0728	0.000667556	0.805324	1.1307	0.938747	6.56644	0.83303	5	5	100
191	7128.86	46	10.4449	0.000270321	0.746168	1.42458	0.929672	11.8576	0.37444	7	6	85.7143
192	6591.6	40.8	10.0824	0.000145359	0.889581	0.771601	0.85552	16.0143	0.190583	5	5	100
193	7880.71	46.1429	7.23654	0.000206662	0.81628	1.36741	0.949569	7.91846	0.79147	7	7	100
194	7493.83	42.8333	9.11954	0.000287571	0.733665	1.57435	0.937487	92.3116	5.04041e-14	6	5	83.3333
195	11047.4	41.8	7.65393	0.000337609	0.829541	1.37036	0.944814	4.25014	0.988228	5	5	100
196	6774.67	52.6667	12.2152	0.000253031	0.779456	1.31285	0.963224	6.5644	0.885008	6	6	100
197	8727.57	42.2857	7.53421	0.000301472	0.718773	1.67381	0.929048	1481.31	0	7	6	85.7143
198	8930.8	47.4	14.9221	0.000141815	0.781138	0.943406	0.937839	19.8434	0.0701067	5	4	80
199	20948.8	59.25	12.4164	9.84852e-05	0.753942	1.50144	0.885816	16.2417	0.236325	4	4	100
200	3141.25	36.5	5.31666	0.000523707	0.814577	1.533	0.884061	4.63625	0.914116	4	4	100
201	8744.62	47.75	8.08409	0.000224808	0.761981	1.48863	0.89986	35.5838	0.000377836	8	6	75
202	9105.29	51.5714	8.66024	0.000360669	0.799867	1.44103	0.920274	16.7444	0.211253	7	6	85.7143
203	10838	44.2	8.735	0.000353747	0.803358	1.36141	0.86011	19.7554	0.0718562	5	5	100
204	7027.17	39.3333	6.82461	0.000319689	0.796588	1.43191	0.962028	6.08351	0.911814	6	6	100
205	6285.25	48	9.29508	0.000413394	0.791118	1.58843	0.954379	5.00003	0.957978	4	4	100
206	7242.12	45.5	8.16025	0.000348523	0.763938	1.54065	0.980938	70.5601	6.32943e-10	8	7	87.5
207	7013.83	37.5	6.36974	0.000475888	0.792223	1.43781	0.903021	10.328	0.587212	6	6	100
208	13612.3	41.5714	8.90662	0.00019434	0.793607	1.41636	0.967603	5.88273	0.950317	7	7	100
209	7395.89	38.8889	5.73472	0.000451241	0.792159	1.49733	0.969689	9.32371	0.74808	9	8	88.8889
210	12152	46	10.4274	0.000235036	0.838639	1.09733	0.910396	9.60452	0.650611	5	5	100
211	10168	53	11.0821	0.000232386	0.749403	1.56041	0.90458	19.5423	0.076254	4	4	100
212	10918.9	44.5714	7.77882	0.000305953	0.77596	1.58852	0.894019	13.6394	0.399719	7	7	100
213	6345.5	36.5	6.18607	0.000392013	0.77537	1.54056	0.842504	9.25806	0.598086	4	4	100
214	15792.1	44.2857	9.59307	0.00026365	0.796698	1.41835	0.941153	13.8293	0.462505	7	7	100
215	15808.7	49.1667	11.9825	0.000117033	0.822026	1.08671	0.930063	9.69997	0.718266	6	5	83.3333
216	7172.33	41.6667	11.7668	0.000234235	0.712594	1.40665	0.771776	99.7762	2.22045e-16	3	2	66.6667
217	12526.1	50.5	10.5807	0.000129245	0.831836	1.14181	0.862735	16.1354	0.185114	8	8	100
218	8835.12	50	7.74097	0.000286205	0.770232	1.67712	0.871112	18.4995	0.0706905	8	8	100
219	5441.17	37	8.8964	0.000464784	0.859756	0.987331	0.909532	6.9985	0.799205	6	6	100
220	10468.7	45.5714	9.48573	0.000379577	0.837369	1.16577	0.888105	14.1669	0.29018	7	7	100
221	3078.5	33.5	10.0935	0.000260899	0.859624	0.803583	0.918495	3.59409	0.936045	2	2	100
222	6267.57	50.8571	12.3308	0.000290426	0.816619	1.20292	0.956987	6.81663	0.813733	7	7	100
223	22077.8	50.4	6.89277	0.000298398	0.799114	1.59416	0.958419	5.44628	0.964011	5	5	100
224	17932.8	48.6667	11.3256	0.00022928	0.759789	1.30145	0.948427	19.8241	0.135786	6	5	83.3333
225	14560.2	53.6	6.53646	0.000171365	0.751565	1.84589	0.864133	15.9838	0.250003	5	5	100
226	8725.83	44.3333	12.5606	0.000267827	0.774295	1.08362	0.926184	19.5573	0.0759372	6	5	83.3333
227	11555.5	46.375	11.8798	0.000351908	0.749419	1.44268	0.948745	8.38456	0.817676	8	7	87.5
228	17325	47.5	5.57997	0.000412183	0.775153	1.94005	0.91461	8.28097	0.824826	4	4	100
229	12807.8	54	12.5002	0.000153818	0.819464	1.03952	0.918062	9.50495	0.659302	5	5	100
230	26037	41	10.1288	0.000136081	0.822174	1.04271	0.890223	11.5899	0.639196	5	4	80
231	10955.9	45.875	11.1117	0.000260875	0.837369	1.03448	0.951758	10.7387	0.6327	8	8	100
232	5177.6	48.8	5.98113	0.000420429	0.740799	1.88995	0.881363	9.13065	0.609834	5	5	100
233	15425.4	48.2	8.46674	0.000122689	0.783378	1.34812	0.812814	21.9654	0.0793279	5	5	100
234	6061.38	39.75	8.97948	0.000346481	0.772895	1.34507	0.945458	11.6198	0.47668	8	7	87.5
235	4766.67	41.3333	6.93943	0.00037777	0.732514	1.64782	0.898808	14.509	0.269392	6	6	100
236	5757.43	45	5.33338	0.000397237	0.757303	1.79152	0.962844	5.48555	0.905395	7	7	100
237	8478.12	46.875	7.44345	0.000332552	0.759758	1.69359	0.949346	10.2319	0.674873	8	8	100
238	5482.5	41	6.31082	0.000394665	0.74169	1.72219	0.899226	12.3754	0.416018	6	6	100
239	11099	44.25	6.5898	0.000301031	0.808081	1.46684	0.93298	4.37674	0.986484	4	4	100
240	10231	48.25	10.009	0.000182343	0.840067	1.19149	0.837323	12.3174	0.420538	4	4	100
241	8309	48.3333	8.94338	0.000249926	0.810267	1.27553	0.974944	4.75693	0.980161	6	6	100
242	8020	45	9.82511	0.000293259	0.761143	1.57241	0.924573	6.83801	0.86813	5	5	100
243	7183.71	47	7.6639	0.000292083	0.800902	1.38882	0.954906	5.12827	0.953557	7	7	100
244	6735.89	44.4444	7.28089	0.000299434	0.763472	1.52097	0.917908	14.464	0.272064	9	8	88.8889
245	9309.11	44	6.66064	0.000285389	0.818239	1.3714	0.936803	13.6885	0.396138	9	9	100
246	7463.25	46	6.24823	0.000248137	0.820768	1.41317	0.854641	9.64382	0.562681	4	4	100
247	14178	54.2222	10.0913	0.000269142	0.756133	1.55932	0.948927	15.2313	0.362525	9	9	100
248	9901.67	47.3333	12.5316	0.000188073	0.810994	1.1214	0.955724	12.7956	0.463721	6	5	83.3333
249	11529	47.25	10.386	0.000197806	0.827768	1.17186	0.963074	6.49971	0.926063	8	8	100
250	11788.8	43	7.18834	0.000250233	0.802146	1.412	0.877769	10.3517	0.585134	6	6	100
251	4446.57	39.8571	6.94603	0.000430149	0.752218	1.561	0.928859	10.2559	0.593522	7	7	100
252	6205.11	35.3333	6.70846	0.000313814	0.803433	1.43049	0.977758	3.49434	0.990934	9	9	100
253	4697	43	9.78833	0.000232883	0.814306	1.07448	0.922005	14.1619	0.224164	6	6	100
254	9291.6	45.4	12.7801	0.000183931	0.773107	1.18676	0.820078	23.6115	0.0229607	5	4	80
255	5919	44.6	8.46692	0.000300636	0.798646	1.37215	0.873295	10.4596	0.489578	5	5	100
256	9863.6	61.2	11.3321	0.000197949	0.746571	1.65596	0.96251	10.6469	0.559394	5	5	100
257	9318	42.4286	10.0353	0.000292594	0.825054	1.20582	0.926318	13.6613	0.398122	7	7	100
258	5684	40.8333	6.34981	0.000234752	0.849149	1.22077	0.839834	13.2589	0.276738	6	6	100
259	14865.8	49.3333	12.626	0.000154318	0.785253	1.28352	0.889886	12.0378	0.442651	6	6	100
260	13116.8	48.75	9.59955	0.000337371	0.775394	1.42945	0.852208	11.5958	0.478664	4	4	100
261	7680.5	43.5	3.65938	0.000537101	0.705743	2.12081	0.832122	12.1983	0.348921	4	4	100
262	7441.43	43.2857	6.37202	0.000364599	0.745295	1.81075	0.939023	7.33631	0.771232	7	6	85.7143
263	12760.7	57	6.50797	0.000137125	0.793582	1.6258	0.961555	4.47077	0.973368	6	6	100
264	5219.33	40	7.25249	0.00031499	0.808615	1.44824	0.922536	6.14114	0.863783	6	6	100
265	12117.8	54.5	9.39738	0.000187687	0.800181	1.51442	0.893273	14.8065	0.319588	6	6	100
266	13124	52	8.4024	0.00031737	0.808259	1.49825	0.97807	4.32313	0.987243	6	6	100
267	15575.5	56.3333	8.51169	0.000282543	0.760535	1.60093	0.941583	9.4718	0.736451	6	6	100
268	8712	41.5	4.64161	0.000456756	0.717321	1.9153	0.886598	18.1842	0.110212	6	6	100
269	9420.43	48.4286	9.68302	0.00036356	0.753649	1.65872	0.932975	18.7453	0.131215	7	6	85.7143
270	9605.29	49	7.95536	0.000265777	0.822578	1.38483	0.887226	13.855	0.310061	7	7	100
271	7380	56.5	9.83879	0.000196405	0.761196	1.5143	0.863565	7.43956	0.827252	2	2	100
272	9626.4	54.8	12.1883	0.000305289	0.781766	1.37901	0.898568	11.8702	0.456157	5	4	80
273	14593.7	51.1111	10.7251	0.000207873	0.793994	1.40538	0.940357	17.5428	0.228406	9	8	88.8889
274	9314.86	49.1429	9.49779	0.000405898	0.759886	1.60484	0.94086	13.6074	0.402064	7	5	71.4286
275	13492.7	39	12.1578	7.60146e-05	0.746257	1.00815	0.919757	615.217	0	3	2	66.6667
276	8408.5	56.5	10.0677	0.000221001	0.774557	1.47103	0.818365	9.54947	0.571308	2	2	100
277	11453.4	51	10.6849	0.000136337	0.838854	1.17554	0.828249	12.856	0.379594	5	5	100
278	6486.57	41	4.66418	0.000491378	0.747637	1.94499	0.938287	9.42095	0.74046	7	7	100
279	14266	48.5	12.7098	0.000142586	0.817982	1.04574	0.870774	19.8398	0.070178	6	6	100
280	10218.8	48.8	14.7327	0.000141147	0.783336	1.12382	0.946528	13.1721	0.356654	5	5	100
281	9138.83	46.8333	11.7051	0.000117984	0.883108	0.782014	0.956705	7.98344	0.786423	6	6	100
282	15609	47.6	7.05683	0.000294282	0.746997	1.8555	0.939466	18.7156	0.132188	5	5	100
283	10785.8	50.75	10.9576	0.000187277	0.855914	1.11357	0.937463	5.32638	0.94618	4	4	100
284	8780.71	46.8571	10.9753	0.00021269	0.770757	1.2438	0.934054	15.2844	0.226251	7	6	85.7143
285	10295.8	48.3333	11.0435	0.000178448	0.798046	1.32568	0.903941	21.4443	0.0645931	6	5	83.3333
286	9986.14	44	7.94875	0.000263147	0.803216	1.39222	0.963653	7.85966	0.852622	7	7	100
287	9467.29	43.2857	5.29741	0.000364026	0.754178	1.83787	0.84249	14.2053	0.287793	7	7	100
288	10459.5	49.5	10.3566	0.000206588	0.783619	1.36107	0.953559	21.2777	0.0676153	6	5	83.3333
289	7045.78	48.4444	6.68456	0.000317325	0.761346	1.67297	0.932454	19.8325	0.0994675	9	9	100
290	7139.62	49.125	7.02731	0.00033986	0.791005	1.70624	0.954001	9.37766	0.670379	8	7	87.5
291	7136	49.2857	11.4368	0.000240766	0.794422	1.22017	0.855969	21.796	0.0398707	7	7	100
292	13187.3	49.4444	10.3158	0.000164136	0.792816	1.43899	0.851617	20.0453	0.0662332	9	8	88.8889
293	6591.29	44.8571	7.76984	0.000276158	0.777377	1.61869	0.914573	12.1472	0.433934	7	7	100
294	19102.6	52.8889	10.7368	0.00024094	0.791629	1.53301	0.948599	13.7704	0.466954	9	8	88.8889
295	8521.43	39.2857	6.64775	0.000261576	0.814739	1.34801	0.950484	8.84876	0.784267	7	7	100
296	5154.5	44.375	8.04269	0.000468657	0.789248	1.49691	0.944919	7.20768	0.782024	8	7	87.5
297	4203.67	43.6667	8.68939	0.000494892	0.763548	1.55254	0.901151	9.49217	0.57656	6	5	83.3333
298	6842	46.8	11.1892	0.000140858	0.888432	0.788876	0.900456	10.3481	0.499375	5	5	100
299	6053.17	41	10.2282	0.000263495	0.791389	1.25271	0.957767	11.1598	0.515275	6	5	83.3333
300	5649	35.6667	7.78156	0.000498546	0.837902	1.26105	0.83866	9.10336	0.694078	3	3	100
301	7503.12	47.375	8.25639	0.000254598	0.785776	1.46099	0.925183	11.8887	0.454659	8	8	100
302	11281.6	54.1429	6.27748	0.000287592	0.777985	1.80349	0.874992	11.5594	0.481683	7	7	100
303	9744.5	58.1667	11.0433	0.000301067	0.762989	1.49305	0.952746	7.43375	0.82767	6	6	100
304	11721.4	54	10.376	0.00020251	0.82284	1.24674	0.956618	9.4648	0.737004	7	7	100
305	9470.29	51	6.59713	0.000276186	0.799957	1.54462	0.908929	15.2275	0.22923	7	7	100
306	7878.2	46.8	7.90335	0.000244599	0.761032	1.6405	0.84953	15.9078	0.144587	5	5	100
307	17226.8	54	10.0187	0.000215734	0.745257	1.74316	0.932097	8.04837	0.886791	4	4	100
308	5616.75	35.75	11.1068	0.000222124	0.786548	0.918155	0.923615	24.6467	0.0165886	4	3	75
309	13688.9	50.1111	10.9513	0.000190723	0.765139	1.33002	0.929781	59.4579	1.45997e-07	9	7	77.7778
310	6613.56	48	10.301	0.000319218	0.715488	1.59067	0.945215	12.0092	0.444944	9	8	88.8889
311	15526.2	50.75	7.58013	0.000161765	0.784077	1.57496	0.881551	13.8647	0.383438	4	2	50
312	7862.67	38.1667	8.99115	0.000295676	0.821212	1.18754	0.960025	4.94177	0.976453	6	6	100
313	18896.4	62.8	7.05396	0.000226874	0.790663	1.6247	0.912961	9.06334	0.768143	5	5	100
314	9583.67	53	10.4993	0.000134015	0.882273	0.992137	0.953414	7.63665	0.86644	6	6	100
315	9416.62	45.875	10.7199	0.000352659	0.76497	1.52547	0.851363	21.1726	0.0479096	8	7	87.5
316	8704	42.1429	9.70953	0.000332582	0.697126	1.6042	0.928135	20.1097	0.0925088	7	6	85.7143
317	7289.5	34.5	14.3629	0.000134753	0.700611	0.954976	0.890641	77.4955	1.2369e-11	2	1	50
318	16661.9	49.5	7.89836	0.000206302	0.818394	1.42804	0.888978	11.435	0.574427	8	7	87.5
319	10725.1	48.5714	6.02704	0.000256889	0.773308	1.76983	0.961462	3.60321	0.98958	7	7	100
320	15535.2	60.3333	15.9352	8.49526e-05	0.831609	0.896601	0.984738	6.35676	0.9322	6	5	83.3333
321	7483.57	49.2857	9.22142	0.000318928	0.785382	1.40039	0.964849	7.8079	0.799956	7	7	100
322	4344.5	49	7.65237	0.000414367	0.835927	1.465	0.754797	15.4836	0.115399	4	4	100
323	10716.9	47.8571	5.97081	0.000218277	0.808916	1.57085	0.930652	11.4108	0.576447	7	7	100
324	6213.71	44.7143	6.74391	0.000270916	0.791652	1.59916	0.929562	9.69779	0.642455	7	7	100
325	8025.5	44.8333	6.50636	0.000245238	0.769825	1.67615	0.931092	11.9411	0.532481	6	6	100
326	20159.8	57.25	15.5851	0.000135439	0.736056	1.46531	0.906346	32.0492	0.00394199	4	3	75
327	8569	49.4	7.87021	0.000172753	0.830526	1.2866	0.915625	6.43753	0.842636	5	5	100
328	7940.57	45.8571	10.0612	0.000224064	0.818194	1.22581	0.935083	15.4103	0.21976	7	7	100
329	12108.9	46.4286	9.16609	0.000226853	0.829927	1.31746	0.913282	8.15179	0.773159	7	7	100
330	7861.67	48.6667	2.43276	0.000327838	0.759309	2.21053	0.944008	1.5872	0.999499	3	3	100
331	7190	44.6	9.89467	0.000198141	0.848165	1.07542	0.95213	4.51048	0.972368	5	5	100
332	3408	44.4	10.2796	0.000406022	0.77142	1.40826	0.908029	6.82451	0.741902	5	5	100
333	10237.8	50.125	6.02137	0.000285899	0.729292	2.0101	0.916993	12.7448	0.387862	8	8	100
334	9162.67	46.8333	7.10449	0.000224295	0.80783	1.50605	0.732699	22.2248	0.0226886	6	6	100
335	9078.8	46	6.62475	0.00037293	0.757806	1.76961	0.94878	11.7578	0.547597	10	10	100
336	10284.8	42.6	7.70389	0.000347745	0.826087	1.35566	0.947073	6.22995	0.904049	5	5	100
337	7419.67	47.8333	8.15189	0.000344384	0.738042	1.71609	0.988071	3.65933	0.994305	6	6	100
338	14946.5	50.6667	8.75927	0.000136889	0.764814	1.45423	0.963195	7.41545	0.879492	6	6	100
339	5733.5	44	10.9335	0.000302849	0.85599	0.988577	0.892548	15.7131	0.204734	8	8	100
340	5578.33	49	8.28017	0.000268437	0.852308	1.22832	0.833401	6.83005	0.741386	3	3	100
341	7100.57	44.7143	9.94244	0.000200218	0.851479	1.01684	0.976906	4.91192	0.960856	7	7	100
342	7753.9	41.5	5.63338	0.000327669	0.788783	1.65837	0.950062	8.15314	0.833482	10	10	100
343	4755	46.5	3.91163	0.000445798	0.712402	2.10944	0.655623	8.28016	0.601492	2	2	100
344	7964.6	45.4	7.66238	0.000302097	0.829815	1.34881	0.878977	12.1182	0.436233	5	5	100
345	10134.5	52.6667	13.1495	0.000175289	0.845567	0.896316	0.925854	14.9808	0.242488	6	6	100
346	10718.6	36.8571	7.23623	0.000239926	0.761152	1.42019	0.946324	205.522	0	7	5	71.4286
347	7263	41.4286	6.13499	0.000294527	0.740717	1.74292	0.902016	12.2921	0.422514	7	7	100
348	5468	43.6	4.42298	0.00047401	0.750666	1.88627	0.963356	2.99326	0.990815	5	5	100
349	5803.43	38.8571	6.9937	0.00034809	0.769956	1.64603	0.861061	16.2418	0.18041	7	7	100
350	4288.43	38.1429	8.65174	0.00045374	0.757902	1.45378	0.965697	70.6684	2.40109e-10	7	6	85.7143
351	8068.25	39.5	6.86889	0.000259931	0.845319	1.17344	0.733319	14.4854	0.270791	4	4	100
352	9245	43.1667	7.44822	0.000249095	0.751381	1.52661	0.934447	192.036	0	6	5	83.3333
353	8149.43	45.1429	9.04769	0.00030978	0.776809	1.47741	0.897978	8.47613	0.670124	7	6	85.7143
354	7682	47	10.7794	0.000165696	0.880853	0.83898	0.657382	12.9738	0.295043	2	2	100
355	9735	42.1429	8.84386	0.000276194	0.81641	1.2352	0.958869	9.01624	0.771716	7	7	100
356	7578	43.75	7.84552	0.000261276	0.802498	1.54773	0.89743	6.22997	0.904048	4	4	100
357	6958.12	44.125	9.68688	0.000351444	0.72845	1.52366	0.952826	12.2782	0.423605	8	7	87.5
358	16622.3	47.1429	9.74373	0.000336866	0.746473	1.59453	0.974643	6.77548	0.943021	7	7	100
359	12231.7	48.1429	7.71317	0.000202791	0.796638	1.54805	0.940855	8.93046	0.778175	7	7	100
360	5845.17	43	7.5748	0.00046581	0.788149	1.50793	0.945893	8.26814	0.763841	6	6	100
361	14913.8	53.5	9.56353	0.000161534	0.827505	1.30854	0.95904	10.2995	0.739978	8	8	100
362	3449.25	36.25	5.83517	0.000418057	0.800852	1.47674	0.898968	5.5459	0.901883	4	4	100
363	10631.7	44.6667	9.37166	0.000216554	0.81415	1.21789	0.828287	15.255	0.227788	6	6	100
364	4291.12	38.75	5.14953	0.000512715	0.739571	1.77712	0.928935	9.18206	0.687307	8	8	100
365	6255.43	43.8571	6.20276	0.00038994	0.816477	1.52369	0.930245	10.0494	0.611627	7	6	85.7143
366	8249.8	40.2	6.1021	0.000429138	0.775299	1.64644	0.956938	5.70012	0.930438	5	5	100
367	11592.8	43.25	11.0507	0.000157998	0.816416	1.18667	0.946931	19.9487	0.131768	8	8	100
368	6185.67	42.1667	10.4692	0.000287375	0.82238	1.099	0.900932	41.0209	4.86101e-05	6	5	83.3333
369	10048	40.6	12.1859	0.00023562	0.778844	1.1334	0.965653	11.6157	0.559376	5	5	100
370	8108.75	48.25	8.41273	0.000269111	0.793846	1.46526	0.931737	9.46465	0.662813	8	8	100
371	6122.14	49	12.888	0.000197964	0.855079	0.852227	0.932454	16.7297	0.16005	7	7	100
372	7585.6	50	10.4682	0.000240983	0.709415	1.61854	0.971652	52.5789	4.89413e-07	5	4	80
373	7583	40.6667	6.71967	0.000200633	0.831268	1.25447	0.641833	12.9172	0.298773	3	3	100
374	7651.14	44.1429	6.89303	0.000291904	0.789801	1.60035	0.92428	11.5958	0.478659	7	7	100
375	63131.7	54	10.8162	0.000270664	0.821182	1.30672	0.96036	4.76309	0.993949	3	3	100
376	6285.83	38.6667	9.94806	0.000175092	0.863903	0.842688	0.955105	8.9187	0.709858	6	6	100
377	15656.7	53.2857	11.967	0.000239175	0.757819	1.47214	0.93316	16.6299	0.216778	7	6	85.7143
378	6347.62	38	8.46691	0.000338307	0.790863	1.36106	0.959399	7.22915	0.842106	8	8	100
379	7027	52.5714	12.1929	0.000185513	0.802914	1.23038	0.943562	12.9493	0.372737	7	7	100
380	8185.71	40.5714	8.74957	0.000391021	0.729719	1.7476	0.821055	71.8275	1.45536e-10	7	5	71.4286
381	10944	48.75	10.3608	0.000245763	0.829564	1.15091	0.900769	14.3214	0.351602	8	8	100
382	5059.17	48.5	13.4534	0.000325301	0.840263	0.864527	0.976103	5.55912	0.936658	6	6	100
383	15444.7	45.6667	7.0018	0.000326998	0.802965	1.52275	0.934356	8.04117	0.840908	6	6	100
384	17713.5	45.25	7.519	0.000281845	0.8312	1.43829	0.746397	15.9267	0.25311	4	4	100
385	13047.4	51.625	10.0006	0.00025555	0.701545	1.7258	0.939537	22.5199	0.0685437	8	6	75
386	7769	46.2857	7.54794	0.000273576	0.832816	1.38008	0.896689	12.103	0.355955	7	7	100
387	7671	54.75	12.2546	0.000209441	0.791443	1.20707	0.879919	14.6464	0.199263	4	4	100
388	6468	41	7.71666	0.000238561	0.842006	1.16265	0.892225	8.00203	0.784972	4	3	75
389	9906.5	50.3333	7.48435	0.00031169	0.827251	1.4263	0.922848	7.27774	0.838727	6	6	100
390	5781.25	42.75	4.85835	0.000405151	0.757534	1.76206	0.95948	2.10069	0.99811	4	4	100
391	11358.6	44	10.4866	0.000252685	0.851127	0.994353	0.92955	12.0537	0.523247	7	7	100
392	11022.9	52.8571	7.51803	0.000196288	0.801117	1.53759	0.957992	7.87898	0.851394	7	7	100
393	10577.4	60.4	7.36375	0.000174403	0.796796	1.60728	0.84922	17.5935	0.128603	5	4	80
394	20775.5	52.25	7.69031	0.000117821	0.8325	1.54415	0.797989	13.9593	0.376714	4	4	100
395	7995.44	46.7778	7.71871	0.000304544	0.804833	1.37306	0.927209	12.6205	0.397216	9	9	100
396	7405.71	51.8571	8.03962	0.000232302	0.783992	1.56836	0.944366	14.6447	0.261446	7	6	85.7143
397	21497.2	56.625	9.82771	0.000108101	0.728776	1.56941	0.924931	13.2834	0.426167	8	7	87.5
398	8930.57	48	12.4774	0.000205891	0.845268	0.877679	0.961985	9.12315	0.76358	7	6	85.7143
399	12310.6	44.4	9.50733	0.000385286	0.787753	1.35292	0.923526	7.53819	0.872332	5	5	100
400	12336.5	50.5	12.3502	0.000251928	0.774854	1.17832	0.939756	11.1425	0.598879	4	4	100
401	5221.5	44.5	10.9466	0.000160388	0.873736	0.831575	0.785757	9.12371	0.520405	2	2	100
402	21882.6	54.7143	15.5999	0.000170108	0.721563	1.42038	0.950599	28.7819	0.0111833	7	5	71.4286
403	7160.8	42.8	8.16342	0.000283942	0.830018	1.23465	0.921055	8.79255	0.72054	5	5	100
404	11163.6	45.4	6.39974	0.000252288	0.800079	1.5136	0.927581	8.23098	0.828234	5	5	100
405	9984.33	52.6667	12.4808	9.71254e-05	0.888259	0.808386	0.825086	17.7325	0.124059	3	3	100
406	5895.14	41.4286	6.00085	0.000322118	0.78285	1.56697	0.959534	5.04158	0.956576	7	7	100
407	14658.2	51.5	8.60467	0.000258349	0.814591	1.49198	0.884492	11.9317	0.533249	6	6	100
408	6941	51	13.0033	0.00013636	0.869887	0.822146	0.917196	10.0081	0.529658	5	5	100
409	4978.71	37	6.67007	0.000438952	0.810818	1.41875	0.939046	6.62582	0.881319	7	7	100
410	15339.1	54.5	12.0953	0.000208662	0.737468	1.51131	0.973157	35.8363	0.00110398	10	9	90
411	19118.5	63	8.96542	8.8036e-05	0.799048	1.43658	0.907099	8.09962	0.83705	4	4	100
412	12152.2	51	11.332	0.000304381	0.794445	1.2878	0.966167	7.97918	0.786755	6	5	83.3333
413	19954.9	53.5714	12.154	0.000226554	0.810146	1.20272	0.944298	11.7559	0.547756	7	7	100
414	20056.2	58.1111	15.7922	8.45159e-05	0.809227	1.10068	0.918327	32.3859	0.00352942	9	8	88.8889
415	13158	53.2	15.7964	9.31934e-05	0.791017	0.921134	0.908057	200.777	0	5	4	80
416	6338.12	43	8.779	0.000254516	0.865002	1.10513	0.936664	9.90397	0.624385	8	8	100
417	8050.17	43.3333	7.83419	0.000359191	0.842831	1.26295	0.878497	12.5875	0.39972	6	6	100
418	6806.62	44.875	9.44225	0.000254117	0.785738	1.42083	0.938773	8.77009	0.722432	8	8	100
419	8243.4	47.6	10.5299	0.000210986	0.841936	1.05704	0.950345	5.36547	0.944645	5	5	100
420	8454.71	39.1429	6.69697	0.000186625	0.853162	1.14217	0.929108	8.53148	0.807337	7	7	100
421	8886.86	44.5714	7.69697	0.000375612	0.770269	1.66772	0.939187	9.30312	0.749684	7	7	100
422	11251.8	43.75	10.1603	0.000130377	0.8701	0.852376	0.892198	7.51546	0.873674	4	4	100
423	12260.5	53	4.01678	0.000325605	0.739273	2.18208	0.871082	12.0077	0.44506	4	4	100
424	5461.86	45.4286	8.82379	0.00025238	0.846696	1.14781	0.916541	11.5081	0.485944	7	6	85.7143
425	10804.2	46.25	7.97521	0.00033853	0.775432	1.67391	0.842416	9.94624	0.620678	4	4	100
426	7567.62	45	8.53728	0.000351449	0.752199	1.64179	0.957187	7.10379	0.850679	8	8	100
427	13891.8	51.75	10.8502	0.000298986	0.761047	1.55576	0.946238	8.54659	0.80626	4	4	100
428	14274.4	53	11.4598	0.000210903	0.77181	1.41549	0.961962	16.92	0.260465	5	4	80
429	6724.4	53.6	9.59359	0.000281012	0.764249	1.63921	0.895561	11.7113	0.385728	5	5	100
430	7485.83	45.1667	7.5867	0.000182438	0.842037	1.24943	0.874629	9.14072	0.608905	6	6	100
431	8698.5	45.25	8.47445	0.000213472	0.779279	1.35889	0.968549	20.9442	0.0740386	8	7	87.5
432	11894	53	6.97926	0.000194579	0.771558	1.68476	0.906253	10.2346	0.595384	6	6	100
433	16682.8	56.8	21.7458	0.000105306	0.788681	0.868226	0.963396	7.081	0.897929	5	5	100
434	6343.25	45	10.5168	0.000244282	0.805641	1.18492	0.93519	8.49813	0.668108	4	4	100
435	13336.6	46.1429	11.2461	0.000327181	0.806587	1.19006	0.887307	18.5057	0.184711	7	7	100
436	11973.2	53.2	8.55468	0.000288159	0.82396	1.37526	0.945861	7.43838	0.87817	5	5	100
437	6404.43	40	7.94659	0.000440266	0.778317	1.46298	0.950827	6.29344	0.853085	7	6	85.7143
438	7282	48.4286	8.59915	0.000326472	0.818699	1.32544	0.935682	12.4733	0.489264	7	7	100
439	5265.33	41.8333	8.19142	0.000395353	0.814489	1.23699	0.938497	6.54876	0.885938	6	6	100
440	6265.71	37.8571	8.97718	0.000302547	0.861353	1.01099	0.937001	7.14513	0.894518	7	7	100
441	12762	48.2	10.2343	0.000176498	0.786791	1.35112	0.869751	18.7366	0.131499	5	5	100
442	22585.9	50.8571	10.0698	0.000159703	0.790247	1.43523	0.959223	8.82193	0.886642	7	7	100
443	15088	46.8333	12.9947	0.000215054	0.807162	1.04509	0.943776	13.1918	0.433107	6	6	100
444	3203.33	37.3333	11.3368	0.000350826	0.811269	0.884361	0.897525	7.78155	0.650165	3	3	100
445	6997	42.6	4.53243	0.000402275	0.754676	1.84662	0.909061	4.60597	0.948739	5	5	100
446	7721	48.1429	8.36498	0.000229787	0.7925	1.41743	0.944486	9.06802	0.69711	7	7	100
447	10045.8	48.5	7.41853	0.000342226	0.724912	1.88768	0.756148	23.9665	0.0205558	4	4	100
448	10986.5	43.3333	6.5755	0.000298381	0.799886	1.51795	0.908376	7.99771	0.843749	6	6	100
449	6250.29	42.7143	10.4942	0.000435616	0.735787	1.47683	0.974007	25.2383	0.021474	7	6	85.7143
450	8591.67	49.8333	8.69796	0.000253225	0.7745	1.48885	0.900466	13.518	0.332542	6	6	100
451	7591.33	42.1667	7.92866	0.000209524	0.841095	1.25175	0.914966	10.9454	0.533603	6	6	100
452	8248.2	41.6	6.84522	0.000328326	0.763533	1.65126	0.944109	7.32883	0.83514	5	5	100
453	13701.6	49.2	11.6296	0.000251066	0.820664	1.34971	0.953985	4.09775	0.990106	5	5	100
454	4633.43	43.8571	6.37677	0.000426239	0.743136	1.75057	0.977738	3.29365	0.986248	7	7	100
455	4022.6	39	10.1234	0.00034147	0.779417	1.16412	0.933001	72.3616	4.33541e-11	5	4	80
456	11271.8	41.3333	7.11702	0.000275442	0.813651	1.48128	0.96589	5.35822	0.966438	6	6	100
457	2749.5	41	12.8995	0.000325217	0.819087	0.877795	0.900372	5.46363	0.858138	2	2	100
458	3339	43.25	7.8931	0.000489195	0.786385	1.52378	0.907632	5.75499	0.83541	4	4	100
459	9590.62	46.625	8.16127	0.000213342	0.818327	1.34301	0.896727	21.0799	0.0713634	8	8	100
460	11781.3	45.5714	9.37114	0.000218136	0.821409	1.26658	0.963031	12.1072	0.518878	7	7	100
461	5455.71	40.8571	6.08675	0.00045383	0.794237	1.55779	0.870588	9.49447	0.576348	7	7	100
462	8201	49	8.3459	0.000226395	0.798314	1.45422	0.891321	12.7602	0.309285	6	6	100
463	7032.38	42.75	11.6583	0.000240875	0.763806	1.25047	0.970093	9.47194	0.662179	8	7	87.5
464	12733.6	50.5714	7.38702	0.000334428	0.804836	1.59533	0.950639	7.49123	0.875096	7	7	100
465	3776	37.6	6.4874	0.000453793	0.756478	1.67057	0.956154	3.64445	0.961965	5	5	100
466	8448	40.2	6.65231	0.000243103	0.77811	1.6747	0.92254	10.607	0.643701	5	5	100
467	3350	39.6667	8.58891	0.000419757	0.800484	1.26367	0.923962	3.17637	0.976963	3	3	100
468	13938.8	55.4	14.6068	0.000212985	0.827206	1.06885	0.930586	10.0036	0.693643	5	5	100
469	13517.1	51	10.7373	0.000192928	0.837864	1.15371	0.928571	13.52	0.486048	8	8	100
470	18600.5	48.8333	11.9277	0.000205294	0.8085	1.27645	0.951505	8.63301	0.853818	6	6	100
471	11988	42.8333	7.19265	0.00031235	0.787345	1.49603	0.920248	10.4522	0.576357	6	6	100
472	5795	47.4	7.19144	0.000364203	0.769035	1.66636	0.917847	4.94022	0.934027	5	5	100
473	9017.4	35	6.32973	0.000440107	0.816226	1.30076	0.919628	4.64707	0.968741	5	5	100
474	8070.71	41.1429	8.21051	0.000387227	0.811299	1.29444	0.981327	5.66106	0.957624	7	7	100
475	6247.29	43.7143	9.80806	0.000182522	0.841321	1.0239	0.912442	9.81197	0.632453	7	7	100
476	6406.86	44.7143	7.14022	0.000333335	0.770265	1.58275	0.920592	13.8499	0.384496	7	7	100
477	8263	45.4	13.629	0.000253036	0.819949	1.10135	0.875342	10.2404	0.594879	5	5	100
478	12542.6	55.4	12.8162	0.000208562	0.865348	1.03627	0.955893	4.81151	0.96398	5	5	100
479	6555	39	6.38378	0.000362146	0.760809	1.61312	0.954686	19.3862	0.111606	7	6	85.7143
480	21484.8	61	9.21592	0.000150467	0.753015	1.74809	0.845269	20.3272	0.0873472	4	4	100
481	12869.5	56.6667	13.5337	0.000299068	0.802238	1.09735	0.981632	4.08133	0.981924	6	6	100
482	9146.43	51.1429	9.40024	0.000237512	0.815655	1.40556	0.93215	12.1839	0.431029	7	7	100
483	9116	37.2	5.59111	0.000238199	0.795533	1.5634	0.905856	11.0763	0.522395	5	5	100
484	15418	56.1667	10.9194	0.000109262	0.752008	1.49221	0.901477	22.3711	0.0335656	6	5	83.3333
485	16756	56.4	12.1221	0.000166485	0.819823	1.14031	0.922312	11.3014	0.585587	5	5	100
486	15044.2	52	9.88813	0.000343384	0.749809	1.71664	0.962043	6.11286	0.941949	6	5	83.3333
487	7670.2	50	11.053	0.000197564	0.817139	1.12558	0.891333	9.43718	0.581606	5	5	100
488	10136.5	49.6667	9.49011	0.000127418	0.850958	1.18942	0.895273	10.7277	0.552384	6	6	100
489	14808.9	44.8571	16.3274	0.000150242	0.790193	1.04533	0.909081	1070.13	0	7	6	85.7143
490	5129.67	59	9.42026	0.000396836	0.735202	1.70834	0.914068	6.25764	0.855632	3	3	100
491	9255.67	49.6667	4.11746	0.000392204	0.709899	2.09109	0.908989	5.16681	0.952174	3	3	100
492	16530	51.2857	8.72978	0.000406272	0.784944	1.57467	0.942519	8.76576	0.790395	7	7	100
493	10319.5	42.25	7.91981	0.000222356	0.764431	1.53912	0.911153	7.50496	0.822522	4	4	100
494	15774	55	8.64275	0.000202206	0.767318	1.61861	0.866071	16.7582	0.210597	5	4	80
495	14515.4	53.4	12.6797	0.000365503	0.796325	1.36067	0.949501	6.66751	0.918464	5	5	100
496	21135.6	56	11.9712	7.04995e-05	0.861275	1.05593	0.944581	7.43063	0.916835	5	5	100
497	16388	57.4	11.5366	0.000175018	0.808347	1.36103	0.953209	6.38361	0.931071	5	5	100
498	9801.71	38	9.31156	0.000252148	0.837366	1.07658	0.949229	12.3239	0.420031	7	6	85.7143
499	6083	48.5	10.9078	0.0002088	0.828111	1.06836	0.940306	9.12277	0.610561	6	6	100
500	13349.4	53.4	12.032	8.24583e-05	0.91642	0.743816	0.842815	13.9203	0.305828	5	5	100
501	12288.4	48.625	15.3888	0.000156986	0.782641	1.05386	0.962278	14.4065	0.345852	8	8	100
502	18052.9	63	10.9758	0.000159152	0.796178	1.44529	0.973793	5.94468	0.948143	7	6	85.7143
503	5547.4	43.8	6.20486	0.000466194	0.789427	1.64225	0.915149	9.46405	0.662866	5	5	100
504	14791.5	50.375	8.49074	0.000203473	0.806485	1.30633	0.93276	11.1599	0.673432	8	8	100
505	10987.7	46.8333	6.56867	0.000343653	0.785863	1.66048	0.805545	14.093	0.294809	6	6	100
506	14490.3	51.6667	7.72775	0.000229004	0.800396	1.53464	0.936124	10.0267	0.691747	6	6	100
507	5782.62	42.375	6.95044	0.000339714	0.817064	1.48612	0.904833	8.81763	0.638722	8	8	100
508	13675.7	52.1429	9.61412	0.000272346	0.823836	1.37285	0.88481	17.513	0.176902	7	7	100
509	5879.25	48	7.69525	0.000353624	0.787843	1.47053	0.960391	11.7927	0.379422	8	8	100
510	14329.4	53.2	10.8563	0.000167187	0.790225	1.33953	0.909325	10.168	0.680145	5	4	80
511	4122	44.25	10.7052	0.000418869	0.722813	1.61118	0.939532	7.80375	0.647999	4	3	75
512	15029.3	45.8571	9.48222	0.000164497	0.827592	1.16017	0.965991	9.47151	0.799713	7	7	100
513	7772.5	49.5	13.9116	0.000263867	0.810394	1.10656	0.974336	15.2303	0.293195	6	5	83.3333
514	10169.6	43.8571	8.47803	0.000105831	0.890106	0.93544	0.972462	3.9277	0.991936	7	7	100
515	7074.17	41	9.57668	0.000220677	0.827384	1.06592	0.955917	10.0228	0.613962	6	6	100
516	8377.57	39.7143	6.03369	0.000423187	0.781843	1.54509	0.95129	7.42396	0.879003	7	7	100
517	6004.5	44.3333	8.54074	0.000286052	0.76982	1.51549	0.885462	14.7483	0.255493	6	6	100
518	5903	44.8333	6.90976	0.000279879	0.792076	1.4735	0.917459	6.70592	0.822374	6	5	83.3333
519	12958.7	51.1429	10.3095	0.000178432	0.762491	1.57213	0.921638	20.4109	0.0854278	7	6	85.7143
520	13315	45	6.04223	0.000267664	0.792537	1.62079	0.925522	14.1896	0.435687	8	8	100
521	11295.2	55.6	9.37929	0.000235798	0.772352	1.51971	0.926415	11.3864	0.578479	5	5	100
522	9125.5	50.375	11.4112	0.00019765	0.854556	0.998052	0.942821	12.3853	0.41525	8	8	100
523	8080.8	45.8	7.93448	0.000268418	0.81071	1.36886	0.888585	6.91838	0.805654	5	5	100
524	11631.8	45.6667	8.53833	0.000205977	0.830358	1.22667	0.90187	10.8041	0.627221	6	6	100
525	9043	42.1	6.38925	0.000273418	0.815864	1.51306	0.930468	10.1523	0.681439	10	10	100
526	14417.8	58	12.7977	0.000230077	0.798764	1.30897	0.948505	11.0668	0.605221	6	6	100
527	9747.83	46.1667	11.1551	0.000214486	0.839187	1.03472	0.887184	15.5836	0.21106	6	6	100
528	3821.5	42.25	8.04922	0.000404559	0.780418	1.3926	0.890517	9.09209	0.523386	4	4	100
529	13235	43	14.7156	7.16278e-05	0.769405	0.94799	0.688171	10.7031	0.381116	1	1	100
530	9360.86	46.7143	7.708	0.000284854	0.804186	1.40345	0.951292	6.59578	0.883131	7	7	100
531	4897	45	8.19057	0.000320647	0.789226	1.54026	0.802398	12.7875	0.235799	4	4	100
532	7624	47.125	10.4248	0.000229191	0.742492	1.37568	0.933444	14.1287	0.292565	8	5	62.5
533	6705.6	47.8	10.3322	0.000205793	0.837881	1.06271	0.94475	6.3775	0.89587	5	5	100
534	6972.8	50.2	10.3298	0.000238728	0.848924	1.04775	0.922716	9.55167	0.655227	5	5	100
535	12973.1	48.25	8.78085	0.000224577	0.831285	1.28382	0.977891	5.95906	0.94763	8	8	100
536	7643.88	46.125	9.37108	0.000280712	0.79095	1.30921	0.955692	10.9476	0.533411	8	8	100
537	10873.7	52.8333	11.8992	0.000303021	0.790056	1.30935	0.906904	13.9481	0.377511	6	5	83.3333
538	8897.4	50.8	13.3329	0.000207874	0.800562	1.15533	0.871624	21.4943	0.0435938	5	5	100
539	20254	53.5	14.1501	0.000120188	0.833334	1.03851	0.899036	15.5596	0.273728	6	5	83.3333
540	4301.33	46	7.80856	0.000374295	0.797564	1.43499	0.901661	11.1683	0.429274	6	6	100
541	7986.2	45.8	10.8796	0.000196959	0.821575	1.08305	0.968156	4.32077	0.987276	5	5	100
542	12048.4	49.8	9.91812	0.000153516	0.794028	1.30451	0.891409	13.71	0.319607	5	5	100
543	19037.3	61.6667	11.2237	0.000185906	0.831746	1.24581	0.888386	10.8424	0.698372	3	3	100
544	7779.56	48.1111	8.60548	0.000246866	0.844552	1.20475	0.93713	12.8507	0.379982	9	9	100
545	11259.4	52.1429	10.5231	0.000167171	0.829551	1.17093	0.938621	11.9473	0.531971	7	7	100
546	8334.62	42.25	7.82675	0.000215309	0.808428	1.29134	0.93286	13.6608	0.398162	8	7	87.5
547	6345.86	50.4286	10.8542	0.000286257	0.78363	1.41121	0.949384	7.79037	0.73195	7	7	100
548	7944.11	43.6667	7.19256	0.000301866	0.747397	1.68178	0.934772	1479.77	0	9	8	88.8889
549	11502.1	49.1429	9.29606	0.000140126	0.824146	1.24551	0.929879	10.0315	0.691357	7	6	85.7143
550	9418.33	44.6667	10.1821	0.000170088	0.826883	1.05127	0.894385	12.255	0.425428	6	6	100
551	6653.4	56	11.1582	0.000222193	0.789484	1.31755	0.968948	5.85957	0.922995	5	5	100
552	9387.4	46.6	6.28264	0.000241847	0.797013	1.55989	0.928211	6.01984	0.915079	5	5	100
553	6942.38	39.75	8.61728	0.000211783	0.825128	1.18845	0.959471	6.89504	0.864471	8	8	100
554	10532.7	52.8571	9.82264	0.000200931	0.804031	1.34435	0.94784	9.25982	0.753049	7	7	100
555	13941	43.8333	6.36314	0.000178348	0.807453	1.60485	0.854938	11.5943	0.561159	6	6	100
556	10969	49.7143	12.1964	0.000362246	0.744944	1.46771	0.973926	5.33679	0.967012	7	5	71.4286
557	8593	56.6667	6.54002	0.000246252	0.77587	1.66658	0.901742	6.69821	0.82297	3	3	100
558	19142.5	55.5	9.07247	8.70123e-05	0.788276	1.46602	0.841376	16.4768	0.224336	4	4	100
559	11694.6	46.4	9.32662	0.000125722	0.85631	1.0748	0.918851	13.3796	0.41894	5	5	100
560	12809	52.4	5.70621	0.000258066	0.745364	1.80204	0.875678	13.6906	0.395991	5	5	100
561	7036.33	36.3333	6.50765	0.000192173	0.833959	1.20231	0.802256	12.4708	0.408647	3	3	100
562	6901.5	48.125	8.41316	0.00030933	0.759531	1.47456	0.941568	15.5861	0.210936	8	8	100
563	5410.8	54.4	9.74691	0.000312096	0.809766	1.33467	0.936333	5.84645	0.883411	5	5	100
564	8104.62	48.75	11.5263	0.000215819	0.811573	1.15204	0.903028	13.1235	0.360126	8	8	100
565	21945.5	55.75	14.5276	8.58748e-05	0.867815	0.806687	0.824298	14.9963	0.307583	4	4	100
566	12455.2	48	7.6588	0.000181075	0.806575	1.41737	0.974888	6.52662	0.924874	9	9	100
567	10181	40.5	11.3377	0.000410047	0.798893	1.27326	0.938407	7.4742	0.876091	6	6	100
568	6973	39	5.90288	0.000222809	0.840999	1.42806	0.574935	15.4566	0.162533	2	2	100
569	4765.25	38	5.28647	0.000395887	0.822986	1.5723	0.80214	9.24067	0.599688	4	4	100
570	6080.88	48.25	8.22502	0.000320595	0.786976	1.52958	0.974475	9.13262	0.762855	8	7	87.5
571	9095.86	51.1429	9.48594	0.000224897	0.776009	1.43021	0.932677	12.4976	0.487325	7	6	85.7143
572	9711	45.75	7.34962	0.000284496	0.751748	1.673	0.906756	15.6179	0.209372	8	8	100
573	8441.2	48.4	13.0305	0.000166382	0.822614	1.11544	0.873424	12.8955	0.376683	5	5	100
574	10796.4	47.8	6.51252	0.000440251	0.740647	1.91404	0.93436	5.8893	0.950089	5	5	100
575	9249.8	51.2	14.0433	0.000260377	0.770365	1.36436	0.924703	10.1479	0.602988	5	5	100
576	1947	29	11.5397	0.000811833	0.600501	1.62046	0.849174	7.52269	0.481425	2	1	50
577	10119.2	59	10.2042	0.000171026	0.797021	1.35382	0.891336	13.4881	0.334584	5	5	100
578	19674	52.4	9.73095	0.00030746	0.763646	1.61019	0.887346	14.0736	0.444244	5	5	100
579	9845.5	57	10.0143	0.000210283	0.815179	1.54192	0.906681	8.51182	0.743964	4	4	100
580	12760.4	53.2857	11.21	0.000239239	0.784046	1.41841	0.931489	10.2077	0.597742	7	7	100
581	5001.38	43.875	6.9577	0.000501491	0.76378	1.65423	0.942316	9.43233	0.582051	8	7	87.5
582	7649.2	54.2	10.7199	0.000207892	0.831502	1.07793	0.955996	6.37838	0.89582	5	5	100
583	9733.5	49.6667	8.5946	0.000182506	0.829665	1.25731	0.86384	13.5622	0.329537	6	6	100
584	13846.2	47.8333	7.59877	0.000291568	0.800273	1.42146	0.906183	14.1426	0.363878	6	6	100
585	7730.67	49.6667	10.332	0.000267443	0.796276	1.26291	0.947076	7.54567	0.819551	6	6	100
586	5950	52.3333	6.41717	0.00032129	0.771205	1.717	0.857113	7.16625	0.785465	3	2	66.6667
587	7408	48.6667	12.0866	0.000250844	0.810333	1.0515	0.992792	1.63615	0.999928	6	6	100
588	8393.5	49	9.25731	0.000347571	0.745841	1.58174	0.743146	15.5729	0.157741	2	2	100
589	9165.12	43	6.43984	0.000312017	0.795596	1.50833	0.939571	9.91225	0.701093	8	8	100
590	15553	67.5	15.725	0.000104128	0.857499	0.868122	0.902374	15.2894	0.289637	4	4	100
591	10725	52.7143	10.4881	0.000135377	0.835213	1.17391	0.947291	9.41334	0.667279	7	7	100
592	3802.8	35.4	5.42679	0.000554727	0.771173	1.6903	0.834148	9.98529	0.531711	5	5	100
593	7808.33	49.8333	6.89544	0.000270286	0.761391	1.72383	0.87897	13.9762	0.302228	6	6	100
594	6421.6	43.4	8.2383	0.000284145	0.823314	1.37499	0.830482	14.6066	0.201223	5	5	100
595	7891.62	45.625	9.55689	0.000206874	0.796217	1.35464	0.930921	13.6767	0.321827	8	8	100
596	18732.6	60.2	7.31023	0.000244738	0.748501	1.90169	0.873881	11.3411	0.582269	5	4	80
597	15226.7	49.1667	8.5788	0.000201144	0.839766	1.28757	0.912517	8.84428	0.7846	6	6	100
598	9913.14	51.4286	6.54511	0.000288288	0.720932	1.89006	0.942392	9.76155	0.636871	7	6	85.7143
599	11734.3	48.8333	11.2745	0.000366152	0.805776	1.30245	0.967496	4.96464	0.95915	6	6	100
600	9447.86	43.7143	7.8182	0.000212982	0.804542	1.38452	0.866707	16.9384	0.202136	7	7	100
601	12860.1	48.25	11.2505	0.000131824	0.858931	0.972866	0.950725	9.96733	0.696604	8	8	100
602	13894.8	58.625	11.493	0.000116012	0.787867	1.3534	0.945563	18.7504	0.131048	8	7	87.5
603	10022.5	53.5	15.0718	0.000131659	0.827706	0.894257	0.953404	8.21935	0.829022	4	4	100
604	10874	51.7143	8.76787	0.000194017	0.807199	1.41071	0.886461	18.061	0.155217	7	7	100
605	4634.33	40.1667	7.7355	0.000330703	0.807588	1.26706	0.928821	7.56038	0.752058	6	6	100
606	12167.3	48.1667	9.85755	9.48377e-05	0.874052	1.01647	0.86834	16.6435	0.163507	6	6	100
607	12459.4	45.6	8.13419	0.000134967	0.792344	1.34955	0.969358	4.64607	0.982181	5	5	100
608	10864.5	50	10.6806	0.00025895	0.777288	1.51903	0.927736	8.03183	0.84152	4	4	100
609	7968	43.625	5.27306	0.000408606	0.764146	1.81033	0.820955	16.859	0.15498	8	8	100
610	8392.17	44.6667	6.93696	0.000223715	0.776425	1.49614	0.916272	10.0509	0.689764	6	6	100
611	9593.6	48.8	10.1286	0.000273973	0.857719	1.0821	0.968327	3.20317	0.993932	5	5	100
612	8016	41.3333	5.52678	0.000512593	0.759976	1.70461	0.849277	7.71534	0.806962	3	3	100
613	10672.4	43.6	8.79136	0.000355315	0.729075	1.68147	0.968361	14.8325	0.317929	5	5	100
614	10475.2	53.25	10.883	0.000148315	0.808903	1.20755	0.962896	24.7124	0.0162459	8	7	87.5
615	20204.5	63.75	7.35233	0.000110844	0.752283	1.85183	0.84061	13.7145	0.394254	4	4	100
616	11379.3	54.6667	12.7881	0.00011116	0.886647	0.810769	0.845126	10.0259	0.528063	3	3	100
617	13108.4	58.2	9.67972	0.000190195	0.831437	1.43865	0.921902	10.0532	0.689577	5	5	100
618	6103.17	42.3333	9.28819	0.00028208	0.803119	1.2179	0.925742	12.365	0.416831	6	6	100
619	12501.9	51.2857	10.7912	0.000234684	0.838196	1.1699	0.921234	15.998	0.249238	7	7	100
620	10172.4	39.5556	7.5247	0.000231261	0.780696	1.39485	0.90986	26.4203	0.022877	9	9	100
621	4844.86	47.7143	9.75924	0.000435853	0.779151	1.40652	0.972086	6.79659	0.815309	7	7	100
622	24407	58.2	14.7792	6.34534e-05	0.869772	0.831488	0.931637	12.0308	0.603828	5	5	100
623	11760.1	44.875	10.6263	0.000197722	0.782761	1.2043	0.947443	12.3587	0.498473	8	7	87.5
624	12186.8	54.4	5.24026	0.000241019	0.759628	1.85036	0.86032	11.074	0.522587	5	5	100
625	8385.5	49.25	8.94363	0.000313238	0.772804	1.46165	0.940997	15.2052	0.294719	8	8	100
626	17362.8	55.8333	5.16162	0.000326859	0.748327	1.8985	0.872121	16.2841	0.296332	6	6	100
627	10992.4	49.8571	10.8258	0.000122924	0.88124	0.951775	0.958592	7.88704	0.850881	7	7	100
628	9542	50	7.05335	0.000206739	0.813675	1.48695	0.932814	6.91238	0.863349	6	6	100
629	8020	50.75	10.8573	0.000288883	0.79572	1.38683	0.956161	8.8679	0.71417	8	8	100
630	5440.75	40.75	6.45041	0.000341973	0.807565	1.46265	0.887978	7.63551	0.812927	4	4	100
631	16077.3	45	10.2295	0.000217169	0.799492	1.37708	0.894692	13.7161	0.394139	7	7	100
632	7353.33	48.6667	7.30907	0.000360436	0.750222	1.72148	0.933729	10.1747	0.600637	6	5	83.3333
633	12884.3	56.5714	9.51486	0.000222025	0.783821	1.60336	0.920086	11.5991	0.478392	7	7	100
634	6050.5	46	8.62785	0.000374404	0.760957	1.49416	0.89974	9.92534	0.537115	4	4	100
635	12521.2	36.2	3.89764	0.000200097	0.803571	1.61522	0.810997	12.9927	0.448378	5	4	80
636	9369.88	45.625	7.62985	0.000267099	0.77085	1.6914	0.86648	19.8455	0.0991302	8	8	100
637	10474.8	53.625	12.4898	0.000205039	0.754074	1.37951	0.954379	34.8214	0.000901815	8	7	87.5
638	11648.8	46.875	12.357	0.000349354	0.743113	1.51286	0.981651	26.3845	0.0231203	8	8	100
639	12017.4	45.8	14.3301	0.000209225	0.801804	1.09613	0.933177	16.9485	0.151544	5	5	100
640	11411.1	48.8571	11.5657	0.000193869	0.83158	1.03196	0.876995	30.3151	0.00424113	7	5	71.4286
641	12413	46.4	3.94208	0.000314426	0.723453	2.14723	0.821995	19.1635	0.118121	5	4	80
642	16746.4	54.2857	14.5474	0.000159083	0.805373	1.05303	0.949629	12.0655	0.522283	7	7	100
643	14557	54.8333	6.87261	0.000248776	0.783825	1.65443	0.930782	9.07098	0.767562	6	6	100
644	8684.5	40.375	6.55581	0.000323223	0.768881	1.61069	0.910751	12.7567	0.309523	8	8	100
645	15503.5	51.5	9.54973	0.000145615	0.755465	1.52052	0.948238	9.60997	0.725475	6	5	83.3333
646	7882.75	47.25	10.3997	9.66342e-05	0.922983	0.732472	0.943871	4.4801	0.953716	4	4	100
647	5320.4	48.4	3.90763	0.000429624	0.723521	2.15802	0.963615	2.66896	0.988178	5	5	100
648	8280.33	46.3333	14.2106	0.000128089	0.80501	0.884921	0.954656	11.0611	0.523693	3	3	100
649	10736.1	42.2857	8.30205	0.000127824	0.831559	1.20638	0.922159	11.7339	0.549576	7	7	100
650	7441.17	40.1667	7.02568	0.000352817	0.78333	1.4635	0.912854	8.8647	0.63438	6	6	100
651	7032.56	44.5556	9.26756	0.00027521	0.792867	1.32055	0.869161	23.4777	0.0239334	9	9	100
652	7422.67	46.5	9.01298	0.000207654	0.789937	1.28898	0.947777	9.47862	0.661597	6	6	100
653	7733	48.6	8.44957	0.00038156	0.747745	1.62455	0.944019	8.99456	0.773354	5	5	100
654	6417	41.8	5.97668	0.000326912	0.791052	1.61255	0.896912	8.06763	0.779823	5	5	100
655	22196.2	55.6667	11.1249	0.000297814	0.84334	1.26983	0.928436	9.67343	0.785649	6	6	100
656	8621	62	21.4254	0.000143167	0.727965	1.00261	0.971215	5.8102	0.885723	4	3	75
657	17521.8	53.25	8.86579	0.000158749	0.806584	1.4062	0.724325	14.3221	0.280615	4	4	100
658	10029	49.3333	8.02164	0.000275134	0.772402	1.67631	0.871417	19.4586	0.0780467	6	6	100
659	7276.17	51	9.56951	0.000206674	0.824691	1.17387	0.920701	16.1924	0.182582	6	6	100
660	14767.8	40.6	3.57655	0.000314057	0.769483	1.84171	0.869761	9.56871	0.728765	5	5	100
661	10661.4	42.9	6.60343	0.000316921	0.773811	1.63194	0.979309	4.35132	0.986848	10	10	100
662	11138	60.25	12.8877	0.000143929	0.826142	1.19405	0.884754	12.2686	0.505747	4	4	100
663	8711.67	45.5	10.1055	0.000229296	0.815187	1.24833	0.950586	9.93451	0.699281	6	6	100
664	12741.4	44.7143	8.13603	0.000421977	0.759015	1.6007	0.953924	7.4284	0.878747	7	7	100
665	5461.12	45	9.91462	0.000180904	0.865458	0.954721	0.96767	6.1961	0.859965	8	8	100
666	6825	47.4286	8.90011	0.000307611	0.792221	1.40606	0.983001	2.9482	0.995899	7	7	100
667	7088.5	51.8333	9.78735	0.00042946	0.689053	1.74766	0.946764	8.66904	0.652411	6	5	83.3333
668	5990.29	38	5.36023	0.000443791	0.794145	1.59723	0.940713	7.67989	0.809619	7	7	100
669	7901.57	46	8.07133	0.000273379	0.800964	1.42604	0.92502	12.9517	0.372563	7	6	85.7143
670	10360.5	38.25	7.61096	0.000115948	0.827836	1.1562	0.840171	10.7695	0.548768	4	4	100
671	18914.5	48.5	12.3223	0.00021851	0.734769	1.69751	0.932924	1063.51	0	6	5	83.3333
672	18416.8	55.2	17.5745	0.000114438	0.766	1.11842	0.935906	24.9707	0.0232894	5	3	60
673	4042.75	39.5	9.46188	0.000408009	0.801027	1.17076	0.98101	4.56887	0.970854	8	8	100
674	10316.6	42.3333	8.89024	0.000231596	0.820414	1.15761	0.88629	19.8125	0.0999842	9	8	88.8889
675	8831.67	49.5	6.65999	0.000262059	0.790223	1.6788	0.861518	12.3565	0.337449	6	5	83.3333
676	6707	53.2	8.53548	0.000235918	0.811988	1.38071	0.946174	5.31472	0.946633	5	5	100
677	14259.7	49.4286	13.0661	0.000125184	0.850065	0.848505	0.940052	14.8388	0.317524	7	7	100
678	21289.3	47	13.1526	0.000266271	0.828481	1.1196	0.945966	14.871	0.387031	7	7	100
679	9445.75	47.75	8.28591	0.000390134	0.810166	1.54246	0.920172	7.14374	0.84797	4	4	100
680	12493.6	49.25	6.3311	0.00017894	0.797787	1.63162	0.916143	11.2272	0.59179	8	8	100
681	18252.4	51	9.07891	0.000135028	0.815678	1.31615	0.893741	14.0228	0.448016	5	5	100
682	11296.9	47	9.6795	0.00022806	0.784676	1.36024	0.940069	12.3092	0.502465	7	7	100
683	33536.5	43	7.89316	0.000406126	0.782666	1.49857	0.950959	8.69464	0.892935	6	6	100
684	11249.6	53	11.033	0.000259877	0.801805	1.31964	0.888825	16.9415	0.201994	5	5	100
685	13223	47.8571	8.79564	0.000232565	0.851815	1.15151	0.925936	11.0868	0.603548	7	7	100
686	15957	58.5	10.1199	0.000133205	0.694813	1.78083	0.948854	11.4515	0.490668	4	4	100
687	11206.4	49.25	8.82809	0.000341729	0.791859	1.49508	0.976366	6.36359	0.931914	8	8	100
688	9643.67	43.8889	9.26861	0.000274777	0.747133	1.50452	0.952353	618.696	0	9	8	88.8889
689	7276.5	53.3333	11.7971	0.000262121	0.704282	1.56539	0.934329	96.0746	3.21965e-15	6	5	83.3333
690	10437.4	51.1429	6.1722	0.00029568	0.722645	1.94307	0.935347	12.2597	0.506472	7	7	100
691	14341.7	40.7143	10.1341	9.46182e-05	0.817447	1.01357	0.842814	23.6137	0.0348746	7	6	85.7143
692	10132.5	40.5	6.64209	0.000261816	0.820764	1.47049	0.911952	11.2794	0.505134	6	6	100
693	6180.17	36	7.37153	0.000226643	0.806963	1.24275	0.91378	7.77861	0.802183	6	6	100
694	6796	38.2	5.76704	0.000375648	0.726694	1.91742	0.899095	9.43145	0.739634	5	5	100
695	5403.71	41.8571	8.93779	0.000270346	0.805321	1.21088	0.954662	6.93126	0.862123	7	7	100
696	6090.25	45.5	7.29011	0.00038986	0.735407	1.87237	0.893948	7.22531	0.780555	4	4	100
697	4201.33	43	6.13809	0.00041878	0.76569	1.68682	0.808278	7.34618	0.692409	3	3	100
698	10588.5	43.5	8.80938	0.000297621	0.824351	1.25924	0.899069	12.7475	0.4675	6	6	100
699	10517.6	51.4	11.7593	0.000174009	0.795201	1.15898	0.949051	22.2797	0.051176	5	4	80
700	4466.29	34.1429	3.45119	0.000472104	0.788105	1.86418	0.955299	2.63448	0.994729	7	7	100
701	14680.5	49	6.36663	0.000220532	0.755788	1.65162	0.968927	7.58156	0.909968	6	6	100
702	3312.75	38	6.62929	0.000449212	0.794639	1.51046	0.957903	3.28241	0.986443	4	4	100
703	5842.43	52.4286	10.5259	0.000275487	0.770602	1.44768	0.955852	11.9273	0.369133	7	6	85.7143
704	7715.25	48.5	8.73165	0.000216504	0.795586	1.40472	0.959627	27.8227	0.00587192	4	3	75
705	10971.5	46.8333	8.81564	0.000259038	0.822837	1.29668	0.874867	9.85378	0.628786	6	6	100
706	9817.33	50	13.7711	0.000252642	0.781855	1.07549	0.949459	9.16574	0.688713	6	5	83.3333
707	17665.5	43.5	12.5328	0.000139295	0.775162	1.49726	0.922882	18.3336	0.145258	4	3	75
708	15121	50.1667	5.99193	0.000275434	0.750387	1.95326	0.803997	17.5816	0.128997	6	5	83.3333
709	12826	46.25	9.21257	0.000112647	0.837659	1.07819	0.877862	12.6165	0.477851	4	4	100
710	5930	45.1667	11.427	0.000255851	0.797361	1.11957	0.973674	4.17703	0.964449	6	6	100
711	11634.4	45.6	6.08254	0.000164948	0.784403	1.60526	0.935224	8.35104	0.820002	5	4	80
712	2450.5	37.5	9.05627	0.000785482	0.728967	1.55953	0.891582	3.82674	0.922441	2	2	100
713	18682.4	52.2857	16.0334	0.000162747	0.811049	1.04873	0.960967	19.6422	0.141833	7	7	100
714	9308.75	53	6.98098	0.000310453	0.753149	1.80328	0.912646	9.7141	0.641026	4	4	100
715	5189.57	45	7.2232	0.000309994	0.768181	1.56335	0.929963	6.95675	0.802575	7	7	100
716	8887.2	54.2	14.4596	0.000241021	0.784422	1.18208	0.968597	6.57646	0.884288	5	5	100
717	6034.17	50	11.5102	0.000257486	0.785885	1.2825	0.963975	5.01749	0.930316	6	6	100
718	5763.25	38.25	10.5834	0.000282583	0.798875	1.16357	0.946143	8.53576	0.741988	4	4	100
719	16553.5	41	4.31294	0.000124257	0.840756	1.48037	0.595172	11.1896	0.512747	2	2	100
720	7470.83	43	8.40972	0.000166921	0.897075	0.93438	0.899566	10.1311	0.604462	6	6	100
721	12318.5	52.8333	10.5877	0.000165312	0.727652	1.50515	0.923561	10.6376	0.560207	6	5	83.3333
722	21558	47.3333	7.67624	0.000131524	0.801172	1.74067	0.871199	6.60417	0.921383	3	3	100
723	7649.5	53.75	7.69844	0.000259688	0.793854	1.48396	0.808286	16.3193	0.177046	4	4	100
724	9695	42.8	7.72955	0.000276474	0.803489	1.3207	0.869691	10.0726	0.687984	5	5	100
725	8240.33	39.5	9.26453	0.0001898	0.770211	1.30533	0.887058	28.055	0.00543049	6	5	83.3333
726	4069	33.3333	6.73761	0.000428807	0.798674	1.40668	0.853452	10.2918	0.504346	3	3	100
727	8633.57	53.4286	8.20404	0.000278869	0.743671	1.79058	0.969071	5.13453	0.953334	7	7	100
728	10094.6	43.6	10.151	0.000279222	0.820987	1.1462	0.928908	10.5367	0.649567	5	5	100
729	20581.8	49	13.1828	9.13079e-05	0.87094	0.807718	0.974748	6.53161	0.951265	5	5	100
730	8256.29	46.2857	7.31285	0.000229035	0.776873	1.61013	0.882646	17.8334	0.163948	7	5	71.4286
731	16946.8	49.8333	9.95515	0.000271367	0.798766	1.58388	0.924279	8.96853	0.775316	6	6	100
732	10226	48.8889	7.56754	0.00025143	0.80034	1.49109	0.931578	16.5614	0.220139	9	9	100
733	5286.4	41	7.38451	0.000557311	0.819322	1.4289	0.919275	6.043	0.87048	5	5	100
734	11412	44	5.98448	0.000318292	0.743	1.88933	0.82259	20.244	0.0626082	5	5	100
735	14703.5	42.5	10.946	0.000154791	0.821417	1.01608	0.928614	193.569	0	6	5	83.3333
736	14522.4	53.2857	13.9616	0.00013824	0.854553	0.955583	0.922439	19.3466	0.112744	7	7	100
737	48878.2	50	9.90778	0.000130315	0.812218	1.30778	0.929118	9.66551	0.840236	5	5	100
738	10629.2	46.6	5.74567	0.000413726	0.742974	1.89176	0.949412	5.07856	0.955303	5	5	100
739	10380	45	9.85946	0.000149446	0.86133	0.978811	0.980504	5.7207	0.95573	8	8	100
740	12538	50.6667	11.1774	0.000198897	0.777039	1.31489	0.933413	10.9893	0.611711	6	6	100
741	6337	56.25	14.7788	0.000160233	0.850319	0.864455	0.944924	8.44885	0.749144	4	4	100
742	14986	49.5	9.81672	0.000182796	0.805447	1.28326	0.872051	16.3182	0.232372	6	6	100
743	16240.8	62.5	16.6857	0.000277763	0.81445	1.17457	0.966745	5.14624	0.971831	4	4	100
744	6834.67	38	4.62213	0.000276148	0.799081	1.62812	0.869734	6.46626	0.890781	3	3	100
745	20023.7	55.6667	11.0296	0.000165102	0.787949	1.73861	0.890555	5.53341	0.961501	3	3	100
746	11254.2	47.6667	11.9815	0.00019118	0.805766	1.13241	0.950406	13.8591	0.383838	6	6	100
747	7365.88	49.125	8.40939	0.000276762	0.79644	1.50251	0.933615	14.8801	0.248057	8	8	100
748	6091.75	45.25	3.84679	0.000447698	0.755365	2.0465	0.933589	9.50531	0.659271	8	8	100
749	12772.9	48.875	10.8476	0.000177684	0.856066	0.965558	0.953916	17.4452	0.233229	8	8	100
750	11393.4	44.2857	7.68347	0.000286872	0.805548	1.37942	0.931533	11.0841	0.603773	7	7	100
751	9740.25	43.5	8.71329	0.000300762	0.748958	1.54839	0.814705	23.1999	0.0260762	4	4	100
752	10646.5	48.3333	13.2049	0.000141891	0.762009	1.18903	0.926468	9.2597	0.680603	6	5	83.3333
753	5912.5	45.5	12.8035	0.000241675	0.853844	0.802018	0.868726	13.7014	0.24996	4	4	100
754	2937.33	35.3333	7.24922	0.000553954	0.808788	1.32427	0.755743	10.0642	0.434877	3	3	100
755	19815.7	63.4286	10.973	0.000130125	0.785459	1.39863	0.900576	16.0934	0.244124	7	7	100
756	12376	45.8	9.2294	0.000307594	0.74744	1.65336	0.880002	46.1722	1.33192e-05	5	3	60
757	4851	45.6667	7.42174	0.000390348	0.758037	1.71811	0.959587	4.32177	0.959542	6	6	100
758	6693.71	47.1429	8.09399	0.000262368	0.819128	1.37592	0.95359	4.47524	0.953902	7	7	100
759	6284.75	49	13.5403	0.000192647	0.830438	0.893449	0.916855	8.00522	0.784723	4	3	75
760	4806.71	41.8571	6.39892	0.000368172	0.776362	1.60799	0.915029	10.9123	0.536446	7	7	100
761	7273.67	54	11.833	0.000226245	0.791505	1.27993	0.797435	17.068	0.10588	3	3	100
762	8140.17	46.5	9.83671	0.000299021	0.808813	1.34445	0.923562	11.6613	0.555595	6	5	83.3333
763	4765.2	38.8	3.25475	0.000509735	0.724794	2.17839	0.771504	7.23004	0.703564	5	5	100
764	5122.67	54.1667	13.7852	0.000778443	0.768531	1.31628	0.963208	10.7831	0.46161	6	6	100
765	7281	52.1429	7.36436	0.000270101	0.76942	1.61639	0.887737	14.0681	0.296381	7	7	100
766	6213.2	41.6	8.49587	0.000396614	0.796245	1.367	0.902936	13.5002	0.333754	5	5	100
767	9510.44	44.2222	9.94659	0.000302689	0.788936	1.2737	0.932705	15.7265	0.264217	9	9	100
768	20289.6	46.4286	11.5222	8.97495e-05	0.839498	0.969398	0.94894	11.269	0.664787	7	7	100
769	19820.3	53.3333	6.37115	0.000188736	0.791782	1.71643	0.831326	9.3262	0.747885	3	3	100
770	10167.4	47	10.1448	0.000254532	0.804981	1.19577	0.932025	11.7146	0.468867	7	6	85.7143
771	11689.3	51.8571	11.6	0.000139705	0.805024	1.23543	0.912728	19.3602	0.112352	7	7	100
772	8134.17	47.6667	8.22867	0.000224122	0.790139	1.51629	0.974938	4.34199	0.976445	6	6	100
773	10205.1	41	6.90653	0.000164342	0.862904	1.13313	0.924363	10.4164	0.65958	7	7	100
774	11512.7	43.6667	9.45563	0.000251331	0.859962	1.01715	0.853565	13.9119	0.306367	6	6	100
775	15722.8	51	11.1501	0.000236002	0.793105	1.39594	0.972814	9.50748	0.797234	9	9	100
776	8868	44	10.7633	0.000214342	0.806999	1.24339	0.974517	4.09273	0.990164	6	6	100
777	14804.7	63.6667	15.0261	9.00525e-05	0.74113	1.31034	0.961374	8.37576	0.818288	3	3	100
778	16928.2	60	10.9963	0.000332687	0.746045	1.61633	0.966714	5.1285	0.972254	5	5	100
779	4241.8	35.4	8.42832	0.000331107	0.756243	1.36986	0.917472	18.8218	0.0929205	5	5	100
780	8870.33	40.6667	13.6173	0.000159925	0.657997	1.45125	0.863356	18.1213	0.112057	3	2	66.6667
781	6542	35.6	6.3671	0.000287001	0.802144	1.40438	0.95824	2.40065	0.998498	5	5	100
782	8106.67	48.2222	8.20224	0.00034476	0.764072	1.59678	0.945004	12.2656	0.505992	9	9	100
783	6173.62	49.625	9.18007	0.00036543	0.805896	1.37029	0.941324	9.11051	0.611692	8	8	100
784	16094.5	45.75	8.54917	0.00017746	0.805204	1.42138	0.823615	11.4943	0.569484	4	4	100
785	11587.3	42.3333	5.50724	0.000340423	0.798992	1.75088	0.875511	11.8119	0.543127	6	6	100
786	6215.2	48.6	8.35974	0.000398774	0.799613	1.35253	0.896204	11.2419	0.423225	5	5	100
787	16201	63.3333	12.0368	0.000112115	0.811647	1.31399	0.818321	12.1358	0.434833	3	2	66.6667
788	9415.43	41.1429	12.5078	0.000342521	0.810596	1.03787	0.956283	12.1317	0.516876	7	7	100
789	9572.2	47.8	10.9127	0.000274408	0.779209	1.37375	0.913953	20.9766	0.0507238	5	4	80
790	10915.8	50.25	13.4044	0.000126779	0.862	0.801566	0.923573	14.0766	0.368473	4	4	100
791	8447.14	45.4286	9.8795	0.00022949	0.81747	1.22494	0.901058	17.9176	0.160673	7	7	100
792	8535.5	42.6667	8.50894	0.000328519	0.786567	1.4516	0.944247	9.57262	0.653398	6	6	100
793	9152.83	47.6667	10.1043	0.000169154	0.816754	1.24136	0.932677	15.4319	0.281174	6	6	100
794	6772.2	52.2	12.4978	0.000222165	0.823602	1.11242	0.902732	14.3705	0.213165	5	5	100
795	14801.3	45.3333	7.97178	0.000195052	0.822243	1.26554	0.968539	5.04899	0.985119	6	6	100
796	13763.6	55.8	15.8851	0.000198448	0.812529	1.10815	0.950213	8.72065	0.793699	5	5	100
797	11369.2	40.6	8.44335	0.000277003	0.779816	1.33726	0.928465	10.7134	0.70839	5	5	100
798	8349.5	47.125	9.28287	0.00026331	0.851594	1.11001	0.905386	13.8256	0.311982	8	8	100
799	5877.12	50.875	9.98411	0.000357231	0.764653	1.52118	0.975036	8.87978	0.713163	8	8	100
800	8522.33	49.5	9.80882	0.000173296	0.807365	1.22155	0.951918	8.11728	0.835877	6	6	100
801	3358.5	30	6.86525	0.000242068	0.885213	0.812728	0.759898	5.23819	0.919084	2	2	100
802	11469.7	53.6667	8.27786	0.000205705	0.793679	1.4937	0.951077	6.89893	0.938538	6	6	100
803	6182.86	43.5714	9.8805	0.000214292	0.866363	0.942832	0.917955	7.51224	0.756215	7	7	100
804	6071.83	41	10.2094	0.000222244	0.847733	1.03699	0.969492	13.2877	0.425846	6	6	100
805	17179.8	55.5	17.707	0.000193829	0.756477	1.18329	0.973317	53.797	1.39144e-06	4	3	75
806	8473.5	55	4.34957	0.000371627	0.721255	2.14216	0.883293	8.62326	0.656622	4	4	100
807	10305.8	48.6667	6.86084	0.000316658	0.75936	1.67701	0.933847	11.2081	0.593389	6	6	100
808	7796.5	43.5	7.94801	0.000266066	0.844955	1.2841	0.907012	9.97861	0.617837	6	6	100
809	21700.3	65.3333	7.39331	9.42756e-05	0.825542	1.72035	0.742656	13.8669	0.309289	3	3	100
810	18557.6	50.4	10.5954	0.00010477	0.851426	1.05973	0.928241	6.91643	0.906407	5	5	100
811	11763.8	50.8	12.1496	0.000165721	0.858507	0.86977	0.918473	9.4833	0.735542	5	5	100
812	6540	49.6667	6.37908	0.000301457	0.728009	1.87441	0.93554	9.01624	0.620393	6	6	100
813	17133.1	47	9.92911	0.000110936	0.831327	1.16449	0.915069	10.1237	0.68379	8	8	100
814	7120.71	39.1429	8.00501	0.00022684	0.887379	0.939306	0.935267	6.33746	0.898125	7	7	100
815	18002.2	61.1667	9.99114	0.000190381	0.756266	1.7188	0.933908	11.3677	0.580043	6	6	100
816	14121.9	52.1429	6.84721	0.000314922	0.802972	1.58625	0.929907	12.1533	0.515113	7	7	100
817	4745.33	43	8.12096	0.000219586	0.87724	0.981276	0.913037	9.28231	0.595852	6	6	100
818	13132.4	50.8571	14.0235	0.000202561	0.848297	1.02792	0.90649	22.7111	0.0452771	7	6	85.7143
819	8957.14	51.4286	11.8528	0.000230904	0.815534	1.15842	0.952195	9.57287	0.653377	7	7	100
820	13314.1	50	11.0469	0.000243201	0.867074	1.01671	0.935808	8.90336	0.780203	7	7	100
821	6583.83	43.1667	5.45095	0.000303071	0.780418	1.70086	0.828853	17.5766	0.129164	6	6	100
822	4590.6	47.8	7.29095	0.000398056	0.753314	1.6832	0.919865	7.77924	0.732932	5	5	100
823	18487.6	56.5714	13.1839	0.000152968	0.822307	1.20543	0.896428	14.7212	0.325082	7	6	85.7143
824	17476.8	54.1667	10.7875	0.000135743	0.804777	1.2549	0.957208	7.71414	0.903681	6	6	100
825	10121.7	40.3333	7.91116	0.000179398	0.804198	1.26724	0.93432	5.11435	0.95405	3	3	100
826	9535.25	42	5.11785	0.000379477	0.785017	1.82077	0.877933	8.58321	0.738057	4	4	100
827	10775.8	56.6667	10.7529	0.000147875	0.849321	1.17107	0.927362	6.06151	0.869229	6	6	100
828	13185.7	51.4286	12.6387	0.000232708	0.781873	1.26668	0.939037	10.5153	0.651347	7	7	100
829	4950.67	44.5556	10.6717	0.000285641	0.822313	1.1576	0.933813	11.2367	0.423651	9	9	100
830	7245	53.2	7.68936	0.000315232	0.781758	1.68068	0.92115	13.841	0.310974	5	5	100
831	8286	42.25	5.56606	0.000307262	0.741927	1.84086	0.97682	7.405	0.880093	8	8	100
832	5338.2	48.4	9.74325	0.000337402	0.792493	1.37654	0.922097	11.3547	0.414045	5	5	100
833	11060.4	41.7778	7.80435	0.000301966	0.786492	1.39172	0.919178	16.3262	0.231965	9	9	100
834	11702.3	40.8333	8.21778	0.000186984	0.807947	1.25458	0.929757	12.9184	0.454137	6	6	100
835	6640.75	46.25	10.8535	0.000350157	0.801738	1.19084	0.900326	6.51882	0.836606	4	4	100
836	9246.67	43.8333	8.39351	0.000256423	0.823194	1.28189	0.940086	9.50282	0.733997	6	6	100
837	10006.4	47.75	10.4809	0.000239699	0.773531	1.37162	0.954614	24.4415	0.0273037	8	8	100
838	16290.8	44.25	8.38515	0.000403958	0.761212	1.4981	0.877241	13.3941	0.495754	4	4	100
839	4614.2	45.4	10.1178	0.000394362	0.691299	1.7778	0.92765	9.1645	0.606711	5	4	80
840	16519.5	53.75	14.4554	0.00014097	0.865514	0.822621	0.865589	14.9092	0.313057	4	4	100
841	5755.43	38.2857	8.59393	0.000284275	0.761704	1.40762	0.98614	4.36632	0.975883	7	7	100
842	15573.3	57.1667	7.86697	0.000119478	0.818683	1.47042	0.93291	8.69474	0.795588	6	6	100
843	6638.2	45.2	8.31903	0.00029903	0.754742	1.57634	0.963626	10.1222	0.605243	5	5	100
844	14741.2	45.4	11.7908	0.000217566	0.855076	0.860614	0.980616	7.4627	0.915402	5	5	100
845	9678.9	43.9	7.48259	0.000374359	0.771478	1.57702	0.952098	193.807	0	10	9	90
846	6075.17	42.8333	8.07293	0.000420102	0.831197	1.2619	0.908264	10.4751	0.574352	6	6	100
847	5405.4	39.2	10.4911	0.000184235	0.868123	0.817114	0.966233	4.59728	0.970097	5	5	100
848	9647.25	52	8.49846	0.000221941	0.811607	1.544	0.830337	14.9618	0.243535	4	4	100
849	7659.38	48.75	11.0146	0.000206781	0.817057	1.15035	0.960754	8.97932	0.704696	8	8	100
850	8207	49.25	12.4957	0.000152751	0.854131	0.858598	0.887522	8.32665	0.683779	4	4	100
851	6396.83	41.6667	6.93235	0.000279562	0.785842	1.47952	0.869523	10.8907	0.452469	6	6	100
852	4358.6	47.6	17.1814	0.000308649	0.752641	0.972618	0.96495	12.0979	0.356326	5	4	80
853	7015.5	50.6667	6.22002	0.000282261	0.778062	1.68636	0.950157	5.74769	0.889658	6	6	100
854	11292.8	51.1111	9.2591	0.00022917	0.789472	1.38716	0.955368	11.596	0.561016	9	9	100
855	18772	52.75	8.54904	0.000224731	0.800158	1.4956	0.890717	12.1108	0.518576	4	3	75
856	5292	37	7.46413	0.000363366	0.8066	1.37361	0.911604	5.29355	0.916121	5	5	100
857	11364.8	53.6667	4.87049	0.000265216	0.755807	1.93568	0.959371	5.01113	0.957606	6	5	83.3333
858	13107.8	50.8	13.673	0.000151293	0.765878	1.16422	0.875812	46.2664	1.28428e-05	5	4	80
859	13097.2	54.1667	9.66056	0.00016911	0.774414	1.51095	0.857095	24.0135	0.0310059	6	6	100
860	10241.6	43.5714	6.25963	0.000330835	0.735264	1.79937	0.97451	9.47313	0.736345	7	7	100
861	14903.3	50	6.6537	0.000125056	0.779739	1.68531	0.912828	6.11756	0.941769	3	3	100
862	4335.5	40.75	7.18178	0.000327515	0.788045	1.46591	0.868502	9.68241	0.559161	4	4	100
863	10679.6	45.6	10.1924	0.000280099	0.830443	1.09069	0.894505	19.0645	0.121117	5	5	100
864	7915.17	49.5	8.40575	0.000227404	0.777068	1.5148	0.908334	9.99694	0.61623	6	6	100
865	8211.29	49.8571	7.58652	0.000280927	0.785321	1.61965	0.891762	14.9493	0.244221	7	7	100
866	11703.3	53.5714	11.1817	0.000289479	0.8177	1.39844	0.906853	15	0.30735	7	7	100
867	16184	42.2	9.19691	0.000152137	0.786836	1.33319	0.940053	8.19723	0.8788	5	5	100
868	9665.33	52	9.94651	0.000231936	0.814634	1.32789	0.883203	15.1479	0.298213	6	6	100
869	9398.2	54	7.28398	0.000210183	0.786999	1.58692	0.916895	8.7278	0.725987	5	5	100
870	9924.86	59.8571	11.8604	0.000170675	0.822582	1.17603	0.919518	17.4337	0.133998	7	7	100
871	6814.6	44	11.0571	0.000197628	0.804446	1.1273	0.948878	16.0087	0.140807	5	5	100
872	14071	45.8333	10.1588	0.00034957	0.817931	1.32416	0.917089	10.9056	0.693436	6	6	100
873	8799.83	43.6667	7.54111	0.00030025	0.798954	1.43788	0.895176	11.2259	0.509666	6	6	100
874	17741.6	56.7143	8.19738	0.000177947	0.798135	1.57074	0.902862	13.5395	0.407056	7	7	100
875	8087.75	53.75	8.83283	0.000278367	0.803618	1.44863	0.919397	16.2493	0.180081	8	6	75
876	7263	45.7143	10.3109	0.000174899	0.848587	1.00554	0.918539	12.2181	0.428328	7	7	100
877	6750.5	43.25	8.71173	0.000524065	0.815615	1.20079	0.929323	4.88414	0.961737	4	4	100
878	13150.3	54.5	12.1291	0.00019764	0.81479	1.29192	0.834273	22.9816	0.0278827	6	6	100
879	23829.6	54.4	12.0831	7.19832e-05	0.871723	0.988718	0.874063	10.7071	0.635337	5	4	80
880	11644.6	46.6667	7.3651	0.000533703	0.734172	1.7613	0.951294	13.1262	0.438115	9	8	88.8889
881	15184	54.4	8.72354	0.000319645	0.750715	1.70143	0.949859	7.65475	0.865343	5	4	80
882	6320.67	41.3333	5.7724	0.000464746	0.79219	1.60188	0.736774	13.3866	0.268809	3	3	100
883	13377.7	57.6667	9.28345	0.000280649	0.755783	1.67633	0.945956	9.58141	0.727753	6	6	100
884	6835.25	52.75	8.94752	0.000306869	0.79483	1.4957	0.930512	4.89886	0.935966	4	4	100
885	6769.83	52	13.0324	0.000289929	0.768059	1.2933	0.906138	24.7139	0.0162384	6	5	83.3333
886	6928.4	40.2	6.42442	0.000230665	0.840687	1.3158	0.83046	13.3455	0.271346	5	5	100
887	7825.67	49	7.09947	0.00025429	0.771394	1.53931	0.944238	9.56272	0.654262	9	9	100
888	6257.67	41	7.08795	0.0001696	0.872247	1.11954	0.9083	3.50431	0.982246	3	3	100
889	14554.1	45.2857	8.96682	0.000208501	0.79094	1.42246	0.936466	15.0494	0.304279	7	7	100
890	13688	47.6	14.0727	0.000280953	0.823427	1.09336	0.881607	14.9091	0.246442	5	5	100
891	16904	47.4	17.2569	0.000202158	0.738395	1.32043	0.931492	519.805	0	5	4	80
892	6958.62	45.625	7.03515	0.000339082	0.769897	1.66723	0.941254	9.70035	0.718235	8	8	100
893	12082.5	44.8333	16.3964	0.00021279	0.74129	1.1198	0.958947	7.9708	0.787408	6	5	83.3333
894	16242.4	50.7143	10.2907	0.000158073	0.787019	1.27453	0.941368	7.59534	0.868928	7	6	85.7143
895	13522	47.25	11.7078	0.000231215	0.758362	1.35802	0.955225	23.5219	0.0522892	8	7	87.5
896	8979.62	54	10.7904	0.000178765	0.811151	1.31291	0.977845	5.25237	0.949014	8	7	87.5
897	14750.8	45	7.18859	0.000468128	0.755696	1.75062	0.86044	12.2445	0.507702	6	5	83.3333
898	7867.14	37.8571	9.91198	0.000247319	0.819285	1.06543	0.972166	9.1928	0.758231	7	7	100
899	15618.5	55.5	16.0637	0.000169785	0.740609	1.21591	0.886441	14.1683	0.3621	4	3	75
900	9752.75	54	13.1805	0.000159728	0.890742	0.791833	0.785896	12.2454	0.345483	4	4	100
901	7281	41.7143	11.6459	0.000204282	0.833316	1.02779	0.949208	10.0844	0.608559	7	7	100
902	6281.67	48.8333	8.14798	0.000408073	0.716656	1.7214	0.949436	8.50809	0.744272	6	6	100
903	5080.43	42.8571	11.091	0.00036296	0.797232	1.2374	0.92157	11.4963	0.40267	7	7	100
904	5574.5	46.5	7.40375	0.000272803	0.813961	1.43735	0.879787	4.50318	0.952827	2	2	100
905	12921	41.7143	10.1611	0.000201346	0.791509	1.29309	0.940734	17.0869	0.195364	7	6	85.7143
906	12343.2	50.75	8.85536	0.000189466	0.780969	1.50442	0.935975	8.26794	0.763857	4	4	100
907	11812.7	52.3333	14.0546	0.000214491	0.775435	1.3166	0.925182	15.4213	0.281796	6	6	100
908	15437.8	44.8	8.99986	0.000165345	0.836587	1.11448	0.836778	15.3316	0.287111	5	4	80
909	5754.71	43.4286	9.46115	0.00034993	0.81231	1.19699	0.924834	10.6855	0.556044	7	7	100
910	3897.17	39.3333	5.713	0.000517995	0.753172	1.71687	0.857125	12.5443	0.324152	6	6	100
911	9209	45	4.87481	0.000367855	0.735115	1.93299	0.867051	16.035	0.139836	7	7	100
912	16153.8	50.6	5.36579	0.00033649	0.753696	1.89213	0.860456	16.5003	0.283783	5	5	100
913	11108.6	52.2222	11.0737	0.000212638	0.81805	1.27564	0.943644	14.9638	0.380637	9	8	88.8889
914	7721.83	39.8333	6.32285	0.0002504	0.767681	1.49377	0.946434	8.0284	0.710757	6	5	83.3333
915	15061.9	50	12.2274	0.000124875	0.802238	1.1686	0.916372	16.5542	0.280715	7	7	100
916	14416	54.8	11.0505	0.000150314	0.778777	1.35983	0.930573	12.0577	0.52292	5	4	80
917	5569.56	45.4444	10.9748	0.000341271	0.778952	1.36153	0.951486	11.5963	0.478619	9	9	100
918	5377.75	40.625	7.64282	0.000363765	0.778125	1.58656	0.918858	11.6448	0.47461	8	8	100
919	8617.25	47.75	7.46603	0.000299972	0.778784	1.6563	0.974621	4.34993	0.986868	8	8	100
920	11137.4	45	10.1349	0.000321326	0.837524	1.07474	0.913098	13.1313	0.359568	5	5	100
921	6614.29	46.5714	7.80535	0.000315677	0.804368	1.60001	0.952067	5.63684	0.933272	7	7	100
922	11291.7	48.1429	9.49614	0.00025597	0.796846	1.37922	0.875586	17.5907	0.128694	7	7	100
923	22021	60.3333	18.9296	5.22421e-05	0.842319	0.836727	0.881191	13.2985	0.503165	3	3	100
924	18379.2	46.3333	8.76669	0.000123372	0.845193	1.21494	0.876664	14.3914	0.34687	6	6	100
925	9632.71	49.7143	8.54989	0.000220763	0.796745	1.39052	0.926016	18.2034	0.109653	7	7	100
926	6615.6	50.8	8.73099	0.000293605	0.758538	1.61212	0.882163	14.6411	0.261651	5	5	100
927	6088.5	46.25	8.83589	0.000326511	0.797244	1.30914	0.979978	5.40331	0.910074	8	8	100
928	4703.2	42.4	7.13684	0.000354311	0.821955	1.38938	0.961523	2.3278	0.996973	5	5	100
929	16906.9	51.8571	9.9306	0.000144382	0.756313	1.44998	0.972737	192.414	0	7	6	85.7143
930	4820	41.125	8.52467	0.000434369	0.794065	1.3602	0.956827	6.80725	0.814471	8	8	100
931	7072.8	47.2	8.05933	0.000202242	0.797752	1.39676	0.834296	13.8289	0.242608	5	5	100
932	10008	47.8333	5.94977	0.000255631	0.824668	1.53385	0.836314	14.9422	0.244612	6	6	100
933	12885.2	49.625	9.54867	0.000202898	0.769624	1.47426	0.945906	26.0057	0.025844	8	7	87.5
934	12176	49.8571	13.1186	0.000125616	0.862933	0.834572	0.989137	5.96053	0.967477	7	7	100
935	10585.7	51.8571	8.60921	0.000199557	0.811199	1.3913	0.913564	17.7034	0.169109	7	7	100
936	6176.67	40	4.85551	0.000298955	0.777772	1.76442	0.765947	7.78116	0.732763	3	3	100
937	15006.1	57.5	16.054	0.00015054	0.793395	1.20086	0.960945	23.2406	0.0388776	8	7	87.5
938	9911.6	42.2	8.46961	0.000553609	0.785525	1.64495	0.935725	4.39773	0.975144	5	5	100
939	7389.75	41.125	8.97849	0.00028761	0.806215	1.35883	0.957842	6.68717	0.917545	8	8	100
940	8411	42.25	6.06482	0.00028834	0.804374	1.52519	0.913402	8.54267	0.741416	8	8	100
941	5732.2	38.4	12.9842	0.000366229	0.730858	1.17973	0.867778	18.0427	0.0805959	5	4	80
942	16720	52	13.2598	0.000102602	0.843847	1.07191	0.937047	14.076	0.444064	5	5	100
943	13312.2	68	13.4583	0.000157538	0.750155	1.45701	0.953502	7.38084	0.831455	4	4	100
944	6727.5	52.5	11.1172	0.000315696	0.758482	1.54964	0.896413	10.7129	0.467618	4	4	100
945	6098	43.1667	8.51847	0.000233126	0.817965	1.27878	0.947067	5.80328	0.886162	6	5	83.3333
946	13708.7	48.3333	8.4732	0.000187424	0.821657	1.34929	0.912096	14.6685	0.3285	9	9	100
947	8039.57	48	8.24835	0.000234666	0.812233	1.35669	0.898896	17.6286	0.127443	7	7	100
948	12986.8	56.6667	12.2285	0.000158163	0.76749	1.33779	0.927952	14.6077	0.33248	6	5	83.3333
949	12590.4	54.8	12.7235	0.000285989	0.794758	1.32576	0.946966	7.08906	0.897504	5	5	100
950	5865.6	50.6	12.4929	0.000266021	0.808733	1.12424	0.97388	3.6491	0.988969	5	5	100
951	5825.33	42.5	7.74947	0.000427421	0.735143	1.7904	0.88481	12.8512	0.303159	6	6	100
952	9138.6	59.8	15.4558	0.000212814	0.788562	1.15139	0.970961	11.7642	0.54707	5	5	100
953	4847.25	46.5	16.8668	0.000418589	0.680623	1.3657	0.968565	10.2093	0.511661	4	3	75
954	10265.5	42.5	6.7161	0.000155161	0.819262	1.54723	0.75895	7.71741	0.806806	2	2	100
955	17319	57.5714	10.319	0.000178765	0.816669	1.39711	0.892159	15.254	0.291768	7	7	100
956	9782.8	49.6	11.5318	0.000175536	0.839514	1.03499	0.928832	6.52937	0.887086	5	5	100
957	11214.8	51.4	9.36917	0.00030311	0.815736	1.35784	0.923989	11.2136	0.59293	5	5	100
958	10264.2	47.2222	8.59191	0.000264331	0.754317	1.72299	0.954492	7.31567	0.885159	9	9	100
959	15790.2	50	12.5266	0.000258078	0.73792	1.67054	0.87164	28.049	0.0140162	5	3	60
960	9893.83	43.5	15.2799	0.000157765	0.772444	0.936269	0.945376	60.8403	3.71501e-08	6	4	66.6667
961	7582.33	45	8.43443	0.000242153	0.828941	1.18904	0.958432	6.81966	0.869297	6	6	100
962	4697.4	46.2	13.0834	0.000236794	0.789914	1.1219	0.951741	14.8959	0.187314	5	5	100
963	7300	49.2	10.4149	0.000170409	0.832184	1.07118	0.946125	8.74629	0.724434	5	5	100
964	4997	48	13.9677	0.000243876	0.756654	1.21152	0.967948	9.3642	0.671549	8	6	75
965	11645.3	50.6667	9.15491	0.000188654	0.779234	1.51706	0.96025	4.96469	0.959148	6	5	83.3333
966	7454.29	38.1429	9.05613	0.000196055	0.848542	1.00511	0.964101	6.08585	0.911693	7	7	100
967	5628.4	46.6	9.77504	0.000339025	0.777199	1.40435	0.969765	11.5419	0.483134	5	5	100
968	10024.8	50.5	3.02242	0.000361485	0.744641	2.23981	0.954798	3.37083	0.992311	4	4	100
969	5089.86	43.2857	8.30424	0.000360843	0.807046	1.40493	0.952154	5.85851	0.882636	7	7	100
970	16005.6	58.8	15.2775	0.000110848	0.856079	0.858222	0.937035	12.403	0.494905	5	5	100
971	7653.33	50.6667	12.0941	0.000215852	0.744203	1.28099	0.873987	10.8628	0.45483	3	3	100
972	9031.67	42.8889	9.50316	0.000227147	0.797453	1.27843	0.980226	5.18461	0.951527	9	9	100
973	7799.6	58.6	17.4019	0.000173124	0.736621	1.20247	0.949511	51.9273	1.38744e-06	5	4	80
974	10057.2	41.75	7.98428	0.00033179	0.79734	1.35292	0.961522	7.05853	0.89911	8	8	100
975	8495.86	48.1429	8.50347	0.000219914	0.783482	1.36187	0.95058	11.1838	0.513236	7	7	100
976	17904.6	52.125	9.86503	0.000261345	0.780273	1.53847	0.883242	17.5034	0.177303	8	7	87.5
977	11170	48.1429	9.14465	0.000111992	0.898409	0.942893	0.943612	10.1381	0.682608	7	7	100
978	13354	45	10.3424	0.000466304	0.80923	1.306	0.860534	12.9036	0.455288	4	3	75
979	8817.57	44.1429	9.22003	0.000213013	0.775606	1.39547	0.928604	10.333	0.586774	7	7	100
980	11097.5	47.125	12.1796	0.000278981	0.822705	0.998063	0.931648	19.4267	0.110457	8	8	100
981	12142.6	52.4	9.47461	0.00026728	0.794713	1.36594	0.929072	8.4712	0.811607	5	5	100
982	4370	45.3333	9.10817	0.000332577	0.828029	1.31437	0.896208	5.62415	0.897229	3	3	100
983	11536.2	53.6667	6.9138	0.000167006	0.788239	1.67342	0.937524	8.3414	0.82067	6	6	100
984	7497.6	42.2	5.97148	0.000247136	0.78042	1.63955	0.911647	8.59663	0.736943	5	5	100
985	9181.6	51.2	9.93679	0.000228339	0.784051	1.36894	0.898265	16.5757	0.166265	5	5	100
986	12145.3	36.1667	8.20094	0.000176076	0.779077	1.29219	0.891108	17.5311	0.176147	6	5	83.3333
987	9123.8	53.2	8.35779	0.000198807	0.75474	1.58623	0.934261	10.053	0.611314	5	5	100
988	11644.6	53.1429	6.23377	0.000272635	0.76705	1.71889	0.969325	5.33917	0.966948	7	7	100
989	10460.7	44	7.77356	0.000201911	0.863498	1.19989	0.907503	11.8129	0.543045	7	7	100
990	17359.8	62	17.1476	0.000112189	0.814634	1.05725	0.961623	9.00849	0.772302	6	6	100
991	13947	52.7778	11.925	0.000132666	0.79449	1.22972	0.961165	17.1524	0.248146	9	9	100
992	11822.2	51.3333	12.0171	0.000317317	0.79148	1.28677	0.987706	3.04819	0.997755	6	6	100
993	9226	44.5	9.10076	0.000212063	0.839719	1.14177	0.963284	3.66209	0.988791	4	4	100
994	8109.25	50	11.4864	0.000237157	0.788617	1.34575	0.944961	17.7843	0.165881	8	8	100
995	5732.2	44.2	8.91356	0.000250444	0.803212	1.35009	0.97904	2.37346	0.996694	5	5	100
996	17163.7	48.6667	14.9697	0.000103656	0.829221	0.884547	0.824795	16.8413	0.155664	3	3	100
997	7101	43	8.66323	0.000420726	0.842106	1.10945	0.957032	7.4291	0.828005	4	4	100
998	5720.71	43.7143	5.42555	0.000393574	0.778788	1.83438	0.948941	5.37008	0.911928	7	7	100
999	11101.4	53.1429	9.70243	0.000298689	0.806057	1.38152	0.957079	8.76814	0.790221	7	7	100
1000	8209.6	40.6	5.5493	0.00051071	0.735031	2.00601	0.895325	9.64117	0.562923	5	5	100
Passing Rate									921(92.1%)
Mean	10306.4	47.4283	9.36552	0.000261403	0.796118	1.37695	0.915225	24.8497	0.547087	5.921	5.676	95.8619
Std. Err.	153.33	0.184177	0.0865718	3.24887e-06	0.00124339	0.00877875	0.00167829	3.76341	0.00970052	0.050451	0.0506516	0.267994
